# Supplementary material
Source: PubMed Central journal article supplement (PMC4655415)
Supplement: cb5b00539_si_001.pdf [file cb5b00539_si_001.pdf]

## SUPPORTING INFORMATION

# Mechanism-based post-translational modification and inactivation in terpene synthases

Roland D. Kersten<sup>1</sup>, Jolene K. Diedrich<sup>2,3</sup>, John R. Yates III<sup>2,3</sup>, Joseph P. Noel<sup>1,4</sup>

Addresses and affiliations.

<sup>1</sup> Howard Hughes Medical Institute, The Salk Institute for Biological Studies, Jack H. Skirball Center for Chemical Biology & Proteomics, La Jolla, CA, 92037, USA,

<sup>2</sup> Department of Chemical Physiology, The Scripps Research Institute, La Jolla, CA 92037, USA,

<sup>3</sup> Vincent J. Coates Mass Spectrometry Center, The Salk Institute of Biological Studies, La Jolla, CA, 92037, USA,

<sup>4</sup> corresponding author: [noel@salk.edu](mailto:noel@salk.edu)

## Supporting information - Text

### Protein expression and purification

A 10 mL Luria broth starter culture (25 g LB (Novagen), ad 1 L milli-Q water) with 50 µg/mL kanamycin was inoculated from a glycerol stock of *Escherichia coli* BL21(DE3) (Novagen) with a TPS gene-pET28a construct and incubated at 37 °C and 250 rpm for 8 h. A 1 L terrific broth culture (47.6 g terrific broth (Novagen), 4 mL glycerol, ad 1 L milli-Q water) with 50 µg/mL kanamycin was inoculated with the starter culture and incubated at 37 °C and 250 rpm. At an OD<sub>600</sub> of ~1.0, IPTG was added to the culture to a final concentration of 0.5 mg/L and the culture was incubated for 16-20 h at 18 °C and 250 rpm. Cells were collected by centrifugation and resuspended in lysis buffer (50 mM Tris-HCl, 500 mM sodium chloride, 20 mM imidazole, 1 % Tween 20, 10 % glycerol, 10 mM β-mercaptoethanol, pH 8). After adding 0.5 mg/mL lysozyme, resuspended cells were stirred at 4 °C for 30 min. Subsequently, the suspension was sonicated (8-12x 30s with 1s on/1s off intervals at 80% amplitude) and centrifugated (38465 g, 45 min, 4 °C). The supernatant was loaded once on a His Pur™ Ni-NTA resin column (Thermo Fisher Scientific) by gravity flow. The protein-loaded Ni-NTA column was washed with 20 column volumes of wash buffer (lysis buffer without Tween 20). His-tag protein was eluted with 5 column volumes of elution buffer (wash buffer with 250 mM imidazole, pH 8). Thrombin was added to the eluted protein (1 µg thrombin/mg eluted protein) and the eluted protein was dialyzed for 16 h at 4 °C with a 12-14 kD Spectra/Por 2 Dialysis membrane (Spectrumlabs) in dialysis buffer (50 mM Tris-HCl, 100 mM sodium chloride, 10 mM β-mercaptoethanol, pH 8). The dialyzed protein fraction was separated from cleaved His-tags by Ni-NTA-liquid chromatography and from thrombin by Benzamidine Sepharose™ 4 Fast Flow (high sub) (GE Healthcare) filtration and purified by fast protein liquid chromatography (Äkta FPLC system, Amersham Biosciences) with a Hi Load™ 16/60 Superdex™ 200 prep grad column (GE Healthcare) as a solid phase and the following mobile phase (50 mM Tris-HCl, 100 mM sodium chloride, 2 mM DTT, pH 8). Target protein fractions were combined, concentrated by 30 kD protein concentrators (Millipore), used for protein assays or crystallization or stored at -80 °C.

**Table S1. Crystallographic data collection and refinement statistics<sup>a</sup>**

| <b>Crystal</b>               | <b>TEAS W273E alkylated</b>         | <b>TEAS W273E nonalkylated</b>      |
|------------------------------|-------------------------------------|-------------------------------------|
| pdb code                     | 5DHK                                | 5DHI                                |
| <b>Data collection</b>       |                                     |                                     |
| Wavelength (Å)               | 1.12949                             | 1.00004                             |
| Resolution range (Å)         | 50.42 - 2.43 (2.52 - 2.43)          | 56.48 - 2.25 (2.33 - 2.25)          |
| Space group                  | <i>P4<sub>1</sub>2<sub>1</sub>2</i> | <i>P4<sub>1</sub>2<sub>1</sub>2</i> |
| Unit-cell parameters:        |                                     |                                     |
| a (Å)                        | 126.7                               | 126.3                               |
| b (Å)                        | 126.7                               | 126.3                               |
| c (Å)                        | 122                                 | 123.4                               |
| Unique reflections           | 36829 (3142)                        | 46034 (3914)                        |
| Multiplicity                 | 8.5 (3.2)                           | 8.7 (4.4)                           |
| Completeness (%)             | 96.88 (84.19)                       | 96.10 (83.06)                       |
| $\langle I/\sigma I \rangle$ | 32.44 (1.26)                        | 12.84 (1.78)                        |
| $R_{merge}$                  | 0.1367 (1.018)                      | 0.1282 (0.7686)                     |
| <b>Refinement</b>            |                                     |                                     |
| $R_{work}$                   | 0.1942 (0.3157)                     | 0.1907 (0.2981)                     |
| $R_{free}$                   | 0.2327 (0.3402)                     | 0.2271 (0.3659)                     |
| Resolution range (Å)         | 50.42 - 2.43 (2.52 - 2.43)          | 56.48 - 2.25 (2.33 - 2.25)          |
| Number of non-hydrogen atoms | 4479                                | 4621                                |
| proteins                     | 4344                                | 4344                                |
| ligands                      | FAR: 15, MG: 2                      | MG: 3                               |
| water                        | 118                                 | 274                                 |
| Protein residues             | 536                                 | 536                                 |
| RMS (bonds) (Å)              | 0.007                               | 0.007                               |
| RMS (angles) (°)             | 0.84                                | 0.81                                |
| Ramachandran favored (%)     | 95                                  | 98                                  |
| Ramachandran outliers (%)    | 0.56                                | 0.19                                |
| Average B-factor             | 53.6                                | 45.6                                |
| protein                      | 53.7                                | 45.6                                |
| ligands                      | 62.1                                | 62.5                                |
| solvent                      | 47.6                                | 45.6                                |

<sup>a</sup>Values in parentheses represent highest resolution shell.

**Table S2. Primer sequences for site-specific mutagenesis**

| Protein     | Mutant | Primer                                  | Primer sequence                              |
|-------------|--------|-----------------------------------------|----------------------------------------------|
| TEAS        | W273C  | fwd                                     | GTTGAATGCTACTTTTTCGGCATTAGGAGTTTATTTTGAGCCTC |
|             |        | rev                                     | GAGGCTCAAAATAAACTCCTAATGCCGAAAAGTAGCATTCAAC  |
|             | W273E  | fwd                                     | GTTGAATGCTACTTTGAGGCATTAGGAGTTTATTTTGAGCCTC  |
|             |        | rev                                     | GAGGCTCAAAATAAACTCCTAATGCCTCAAAGTAGCATTCAAC  |
|             | W273F  | fwd                                     | GTTGAATGCTACTTTTTCGCATTAGGAGTTTATTTTGAGCCTC  |
|             |        | rev                                     | GAGGCTCAAAATAAACTCCTAATGCGAAAAAGTAGCATTCAAC  |
|             | V277L  | fwd                                     | CTTTTGGGCATTAGGACTTTATTTTGAGCCTCAATAC        |
|             |        | rev                                     | GTATTGAGGCTCAAAATAAAGTCCTAATGCCCAAAG         |
|             | I294L  | fwd                                     | CATGCTCGTTAAGACCCTATCAATGATTTTCGATTG         |
|             |        | rev                                     | CAATCGAAATCATTGATAGGGTCTTAACGAGCATG          |
|             | Y404C  | fwd                                     | CTAGCAACTACCACATGTTACTACCTCGCGACAAC          |
|             |        | rev                                     | GTTGTCGCGAGGTAGTAACATGTGGTAGTTGCTAG          |
|             | Y404F  | fwd                                     | CACTAGCAACTACCACATTTTACTACCTCGCGACAAC        |
|             |        | rev                                     | GTTGTCGCGAGGTAGTAAATGTGGTAGTTGCTAGTG         |
|             | L407I  | fwd                                     | CTACCACATATTACTACATCGCGACAACATCGTATTTGG      |
|             |        | rev                                     | CCAAATACGATGTTGTGCGGATGTAGTAATATGTGGTAG      |
| L407P       | fwd    | CTACCACATATTACTACCCCGCGACAACATCGTATTTGG |                                              |
|             | rev    | CCAAATACGATGTTGTGCGGGGTAGTAATATGTGGTAG  |                                              |
| L512I       | fwd    | CTCCTATTCTCAATATTGCTCGTATTGTTGAGGTTAC   |                                              |
|             | rev    | GTAACCTCAACAATACGAGCAATATTGAGAATAGGAG   |                                              |
| HPS         | W280E  | fwd                                     | GCAGTTGAGTGCTACTTTGAGACGATGGGGGTGTATGC       |
|             |        | rev                                     | GCATACACCCCATCGTCTCAAAGTAGCACTCAACTGC        |
| CVS         | W273E  | fwd                                     | GTGGAGTTATATTTTGAGGATTTAGGGACATACTTCG        |
|             |        | rev                                     | CGAAGTATGTCCCTAAATCCTCAAATATAACTCCAC         |
| ATAS        | Y61C   | fwd                                     | GGTAACGTGCCTGTGCTTTCCGAAGGCGCTGG             |
|             |        | rev                                     | CCAGCGCCTTCGGAAAGCACAGGCACGTTACC             |
| PAS         | W276E  | fwd                                     | GTGGAAAGCTATTTTGAGGCGAGCGGCAGC               |
|             |        | rev                                     | GCTGCCGCTCGCCTCAAATAGCTTTCCAC                |
| Sspissy     | W293E  | fwd                                     | GCTGCAGAGTTACATGGAGTCTGCGCCATCGCAAGC         |
|             |        | rev                                     | GCTTGCATGGCGCAGGACTCCATGTAACTCTGCAGC         |
| $\gamma$ HS | W315P  | fwd                                     | CGTGGAATTTTACTTCccGATGGCGGCGGCAATTAGC        |
|             |        | rev                                     | GCTAATTGCCCGCCCATCggGAAGTAAATTCACG           |

Abbreviations: TEAS – tobacco 5-*epi*-aristolochene synthase, HPS – *Hyoscyamus muticus* premnaspirodiene synthase, ATAS – *Aspergillus terreus* aristolochene synthase, CVS – citrus valencene synthase, SspiSSy – *Santalum spicatum* santalene synthase,  $\gamma$ HS –  $\gamma$ -humulene synthase, PAS – patchoulol synthase, fwd – forward, rev – reverse.

**Table S3. Estimation of alkylation rates of TEAS mutants W273E and Y404F based on kinetic parameters and alkylation level estimation from proteomic analysis.**

| Mutant     | $k_{\text{cat}}$ [ $\text{s}^{-1}$ ] | $K_m$ [ $\mu\text{M}$ ] | Alkylation level estimate (12h)* | Alkylation rate estimate (per substrate turnover) |
|------------|--------------------------------------|-------------------------|----------------------------------|---------------------------------------------------|
| TEAS W273E | $0.00039 \pm 0.00001$                | $4.3 \pm 0.4$           | 50%                              | 3%                                                |
| TEAS Y404F | $1.16 \pm 0.04$                      | $10.6 \pm 1.1$          | 5%                               | 0.04%                                             |

\* - based on proteomic analysis

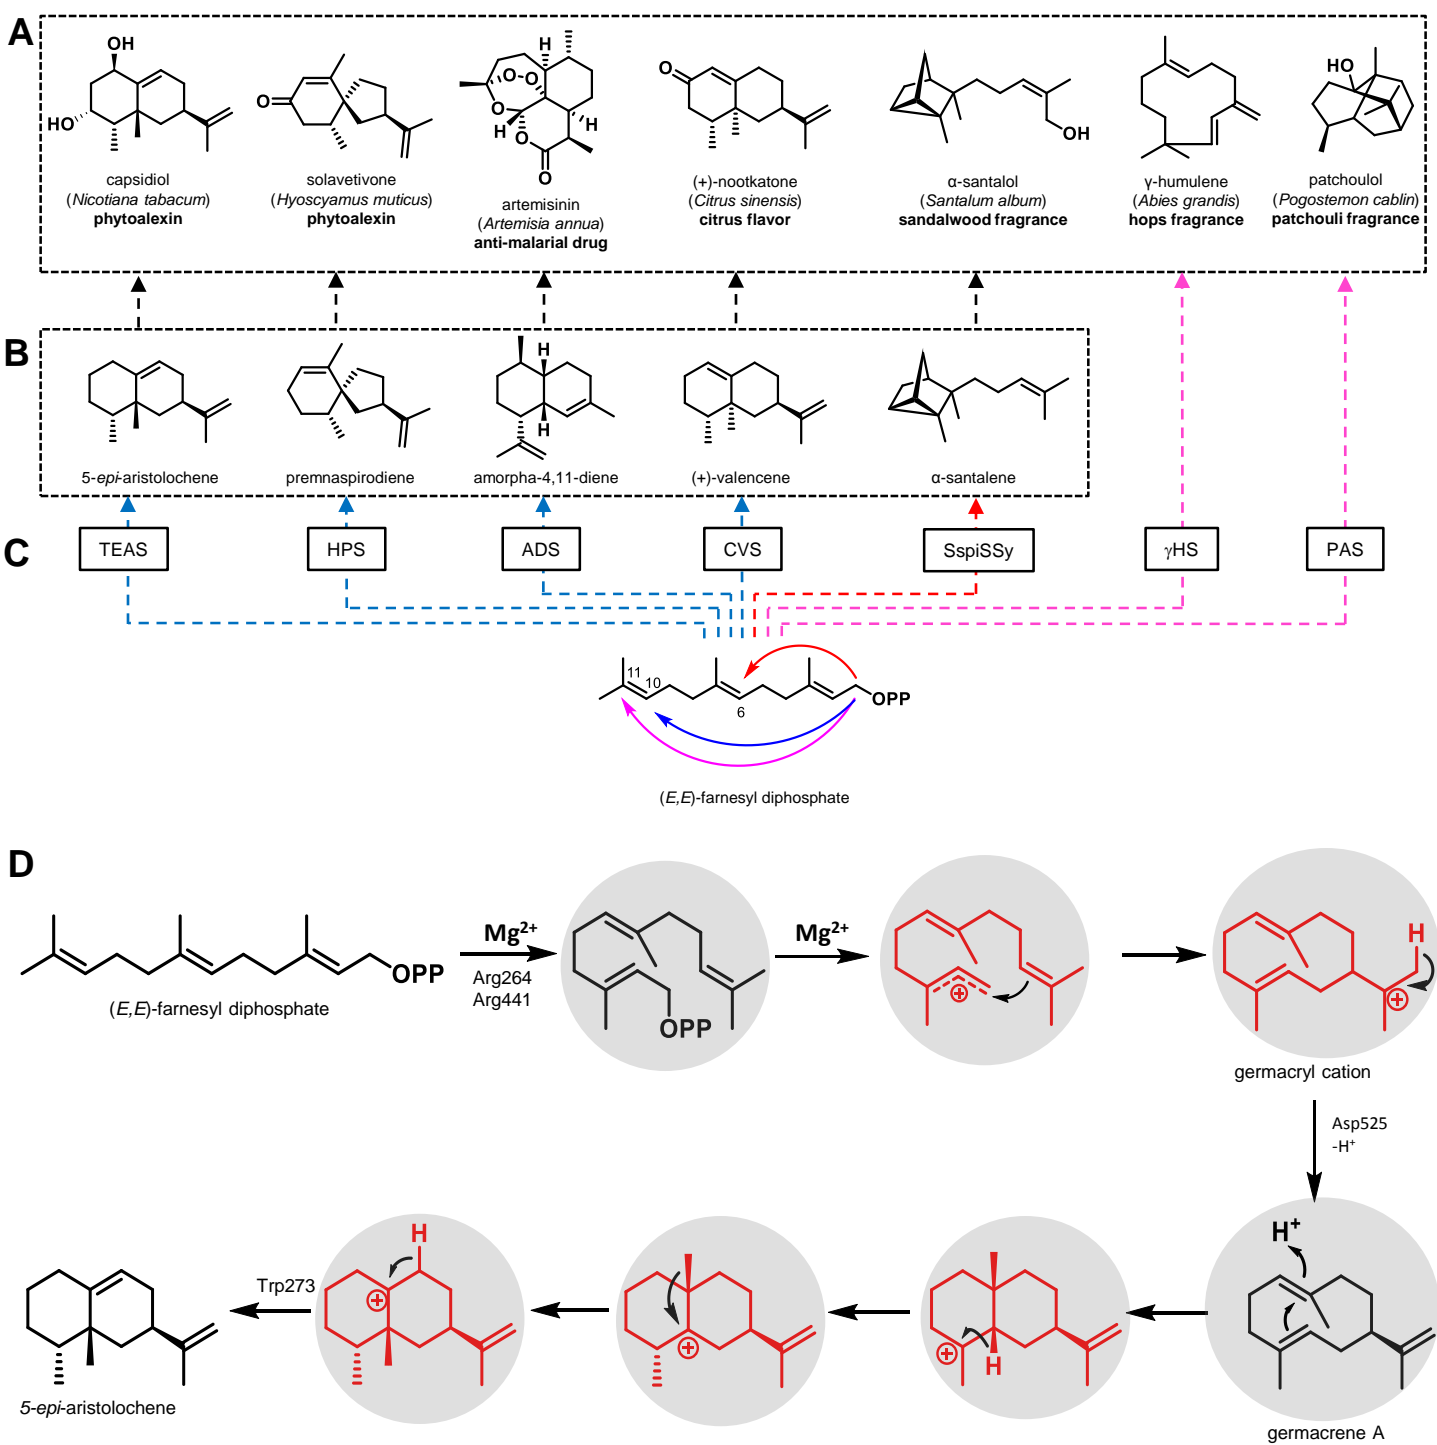

**Figure S1. Structures, functions and biosynthesis of sesquiterpene natural products.** (A) Structures of plant sesquiterpene natural products and corresponding cyclic sesquiterpene scaffolds (B). (C) Biosynthesis of cyclic sesquiterpene structures by plant sesquiterpene synthases via three different cyclization pathways from conventional sesquiterpene substrate (*E,E*)-farnesyl diphosphate. Abbreviations: TEAS – tobacco 5-*epi*-aristolochene synthase, HPS – *Hyoscyamus muticus* premnaspirodiene synthase, ADS – amorpho-4,11-diene synthase, CVS – citrus valencene synthase, SspiSSy – *Santalum spicatum* santalene synthase,  $\gamma$ HS –  $\gamma$ -humulene synthase, PAS – patchoulol synthase. (D) Proposed biosynthetic mechanism of TEAS with cationic intermediates highlighted in red and active site intermediates highlighted in grey.

**A**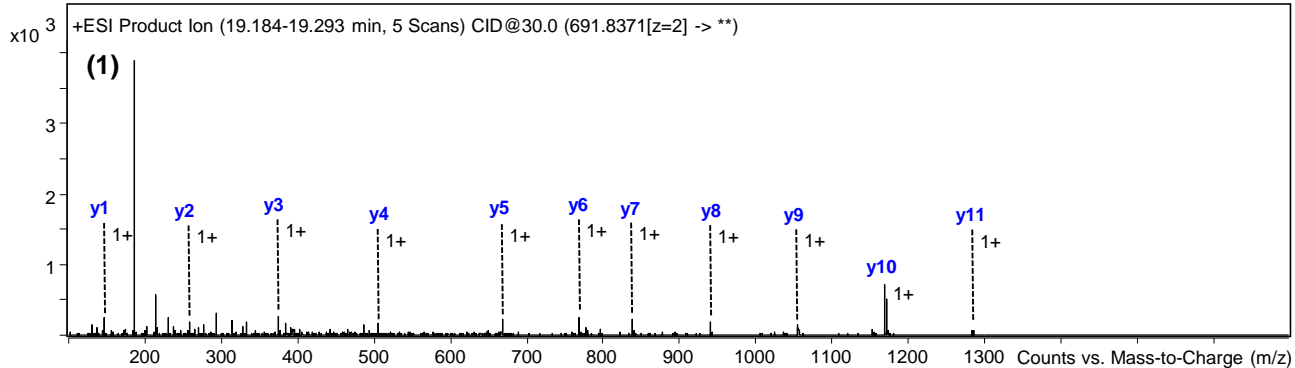

| Fragment | m(obs) [Da] | m(calc) [Da] | $\Delta$ m [Da] | $\Delta$ m [ppm] | Fragment | m(obs) [Da] | m(calc) [Da] | $\Delta$ m [Da] | $\Delta$ m [ppm] |
|----------|-------------|--------------|-----------------|------------------|----------|-------------|--------------|-----------------|------------------|
| y1       | 147.111     | 147.113      | -0.002          | 14.0             | y7       | 839.411     | 839.415      | -0.004          | 4.8              |
| y2       | 276.153     | 276.156      | -0.003          | 11.0             | y8       | 940.459     | 940.463      | -0.004          | 4.3              |
| y3       | 375.220     | 375.224      | -0.004          | 11.0             | y9       | 1055.496    | 1055.490     | 0.006           | 5.7              |
| y4       | 504.266     | 504.267      | -0.001          | 2.0              | y10      | 1170.515    | 1170.517     | -0.002          | 1.7              |
| y5       | 667.331     | 667.330      | 0.001           | 1.5              | y11      | 1283.606    | 1283.601     | 0.005           | 3.9              |
| y6       | 768.375     | 768.378      | -0.003          | 3.9              |          |             |              |                 |                  |

**B**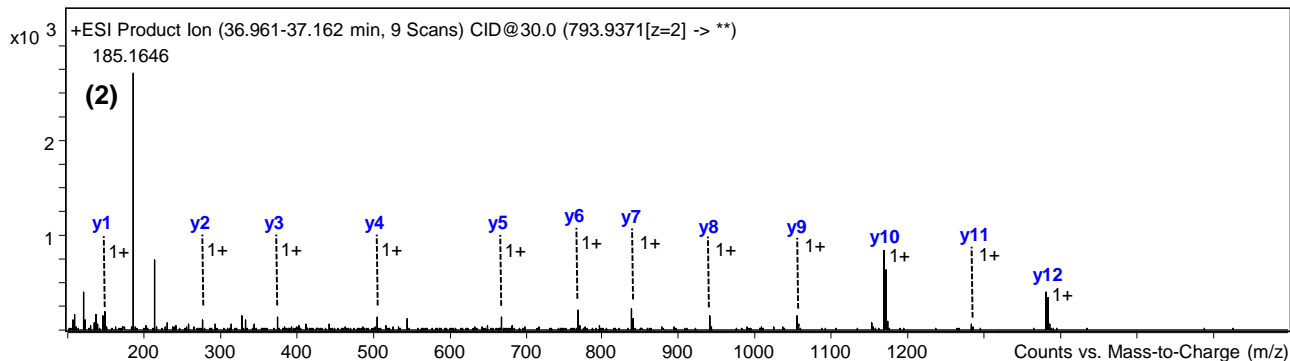

| Fragment | m(obs) [Da] | m(calc) [Da] | $\Delta$ m [Da] | $\Delta$ m [ppm] | Fragment | m(obs) [Da] | m(calc) [Da] | $\Delta$ m [Da] | $\Delta$ m [ppm] |
|----------|-------------|--------------|-----------------|------------------|----------|-------------|--------------|-----------------|------------------|
| y1       | 147.111     | 147.113      | -0.002          | 13.6             | y7       | 839.415     | 839.415      | 0.000           | 0.0              |
| y2       | 276.156     | 276.156      | 0.000           | 0.0              | y8       | 940.467     | 940.463      | 0.004           | 4.3              |
| y3       | 375.222     | 375.224      | -0.002          | 5.3              | y9       | 1055.487    | 1055.490     | -0.003          | 2.8              |
| y4       | 504.268     | 504.267      | 0.001           | 2.0              | y10      | 1170.519    | 1170.517     | 0.002           | 1.7              |
| y5       | 667.334     | 667.330      | 0.004           | 6.0              | y11      | 1283.598    | 1283.601     | -0.003          | 2.3              |
| y6       | 768.380     | 768.378      | 0.002           | 2.6              | y12      | 1382.671    | 1382.669     | 0.002           | 1.5              |

**Figure S2. Alkylation analysis of TEAS active site mutant W273E by bottom-up proteomic LC-MS. (A)** MS/MS analysis of nonalkylated tryptic peptide V[442-453]K of TEAS W273E after reaction with (*E,E*)-FPP (1, Figure 2B). **(B)** MS/MS analysis of alkylated tryptic peptide I[515-532]K of TEAS W273E after reaction with (*E,E*)-FPP (2, Figure 2B).

**C**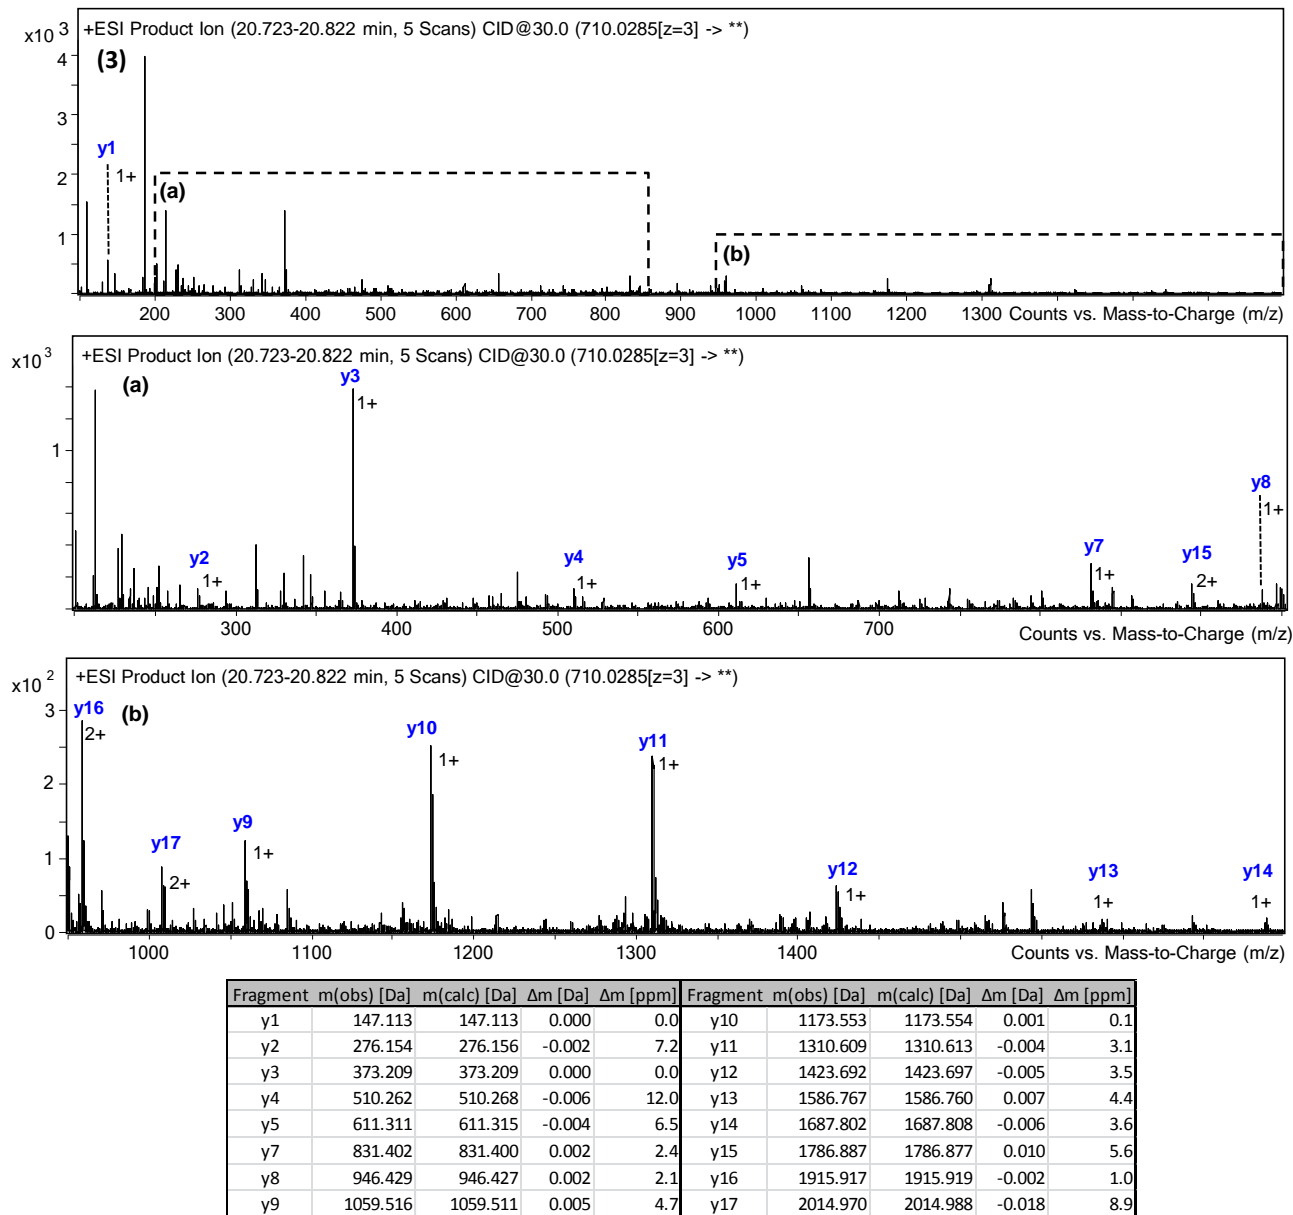

**Figure S2. Alkylation analysis of TEAS active site mutants by bottom-up proteomic LC-MS. (C)** MS/MS analysis of non-alkylated tryptic peptide I[515-532]K of TEAS W273E after reaction with (*E,E*)-FPP (3, Figure 2B).



**D**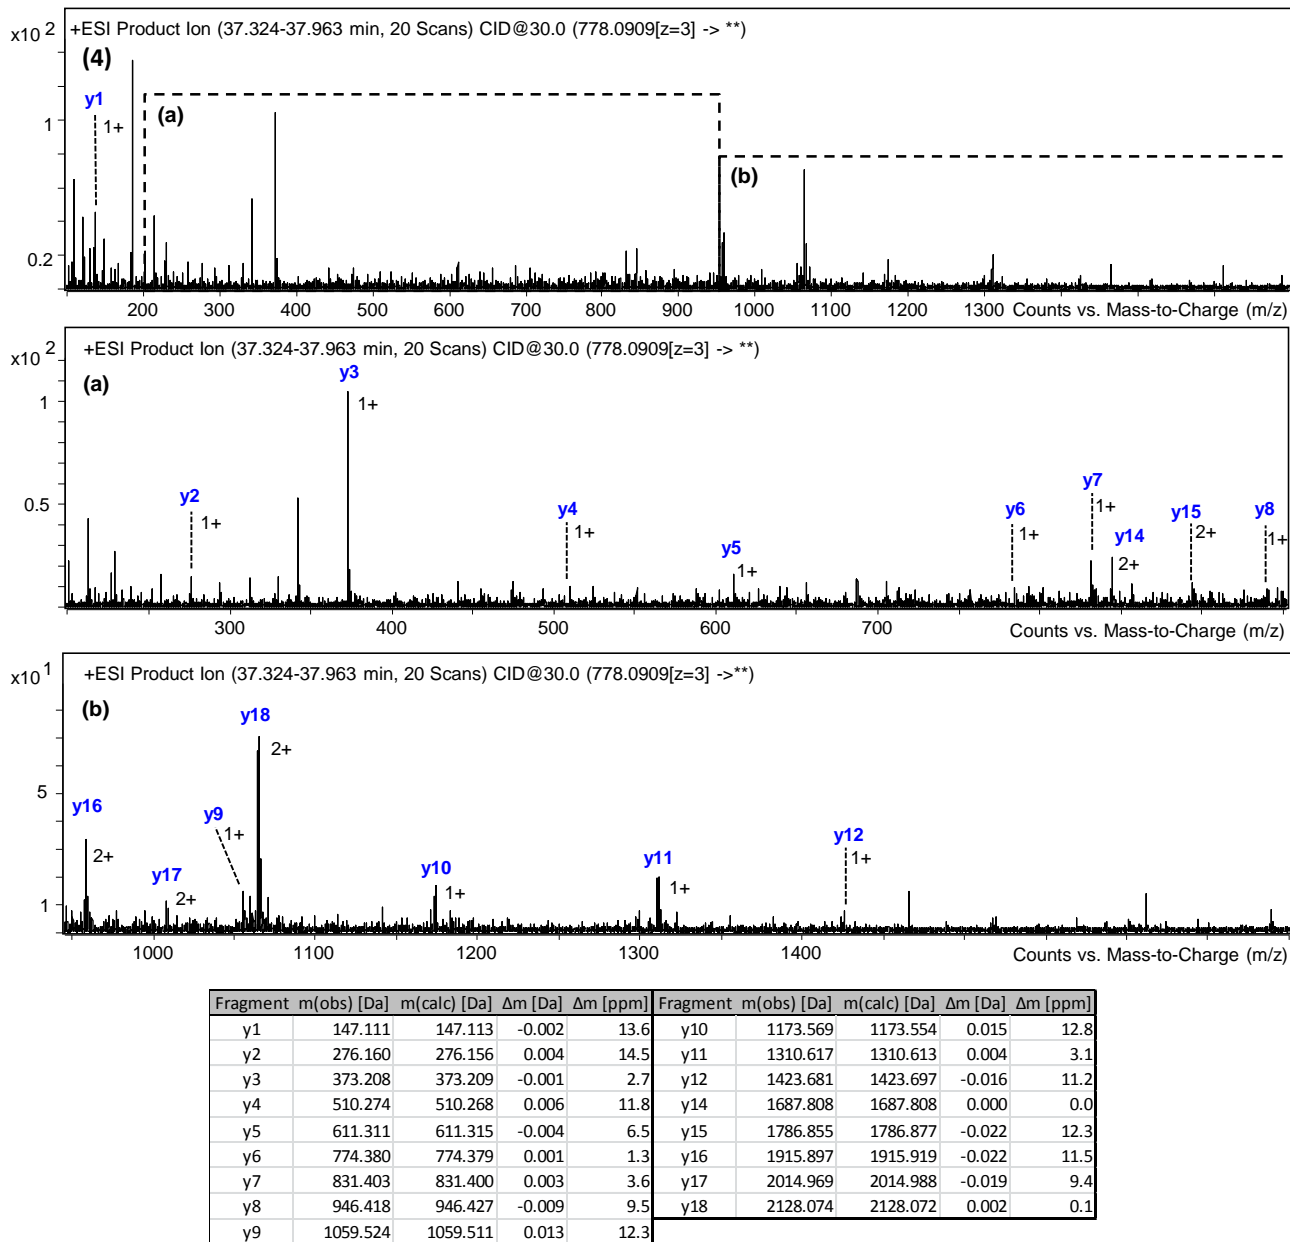

**Figure S2. Alkylation analysis of TEAS active site mutants by bottom-up proteomic LCMS. (D)** MS/MS analysis of alkylated tryptic peptide [515-532]K of TEAS W273E after reaction with (*E,E*)-FPP (4, Figure 2B).

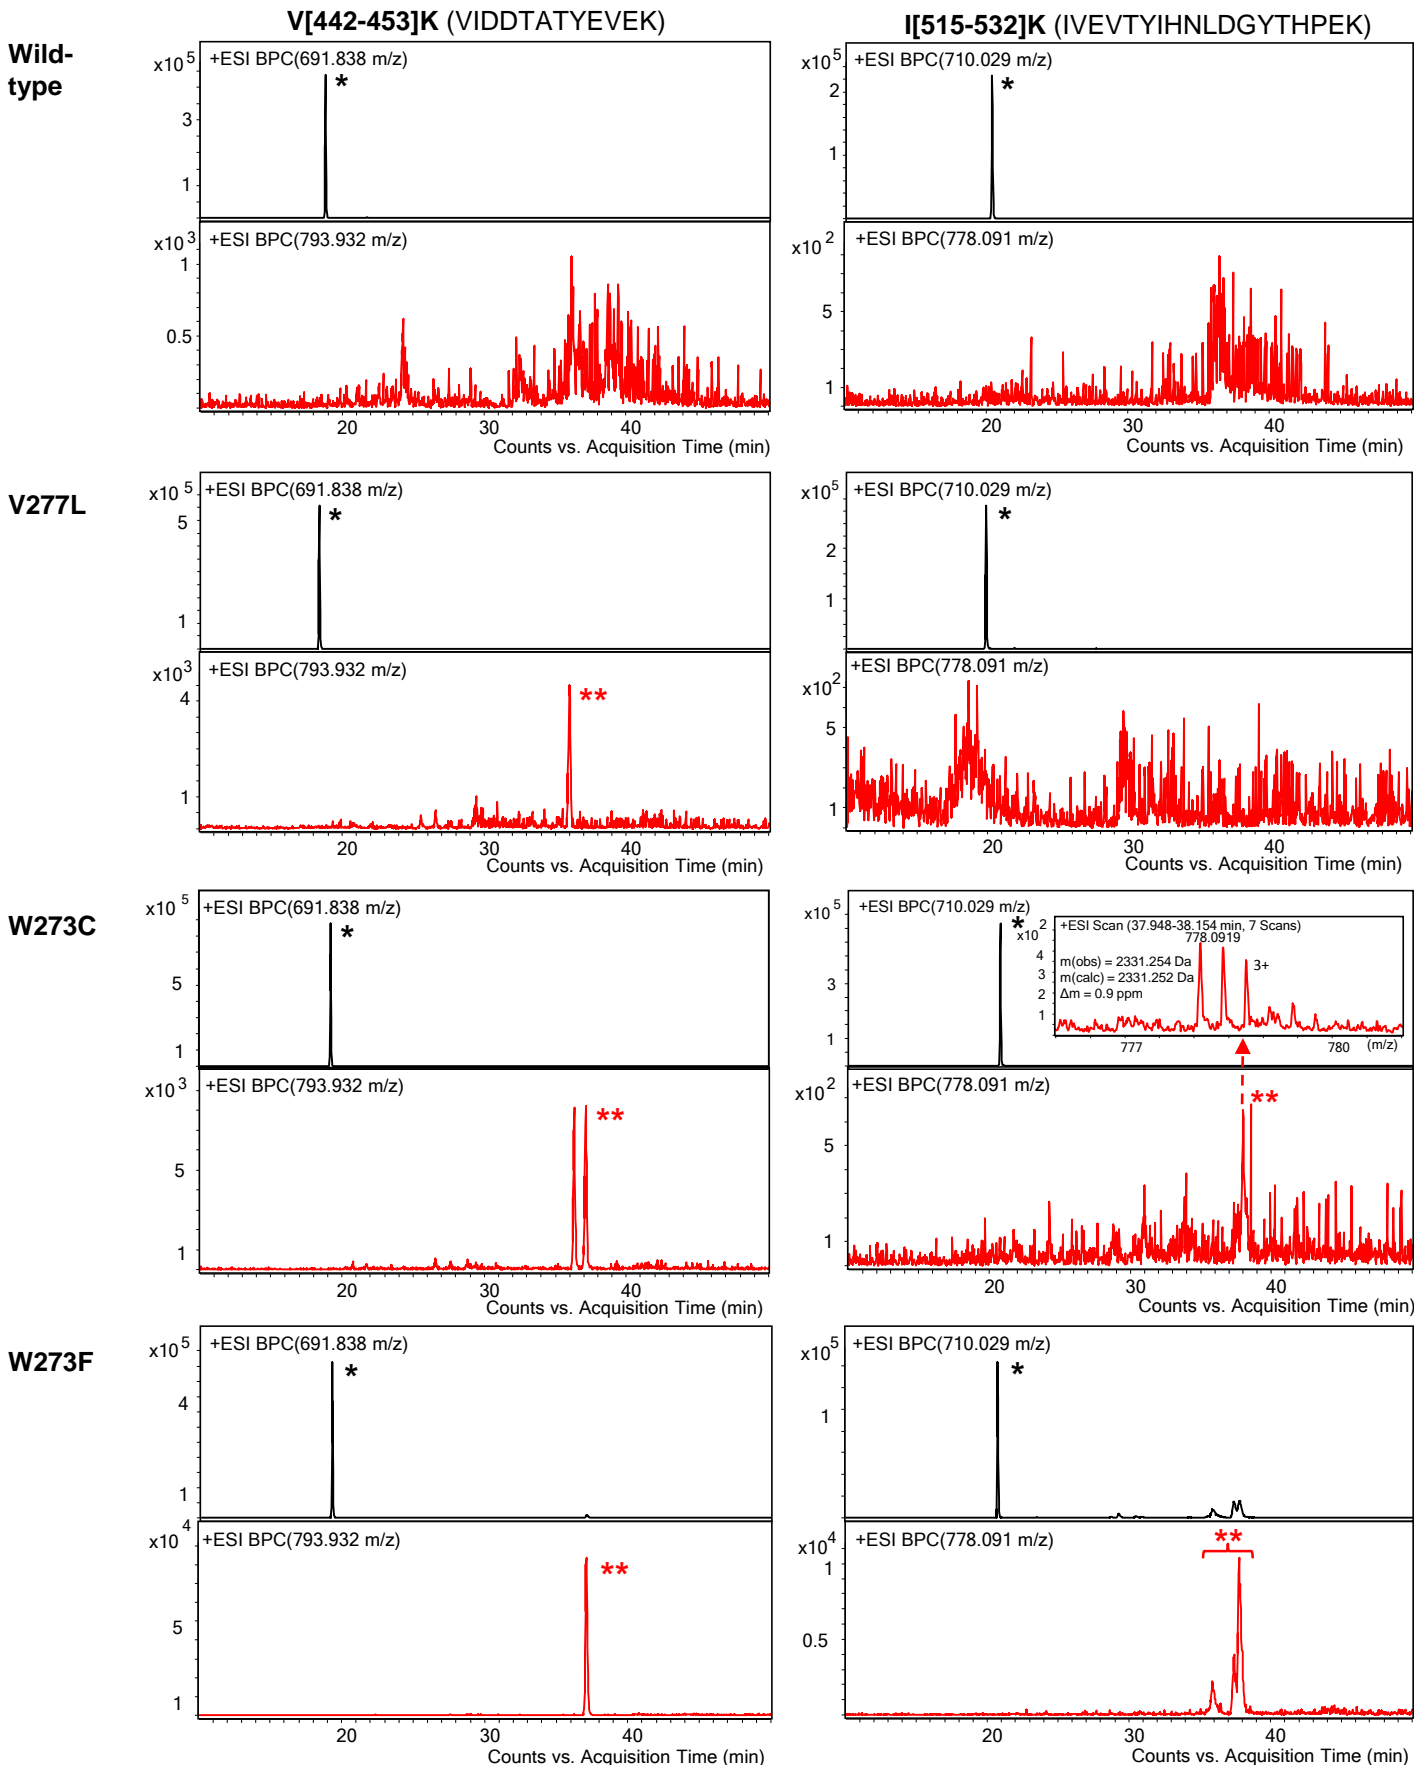

**Figure S3. Alkylation analysis of TEAS active site mutants by bottom-up proteomic LC-MS.** LC-MS analysis of nonalkylated and alkylated tryptic peptides V[442-453]K and I[515-532]K of TEAS active site mutants after reaction with (*E,E*)-FPP. Nonalkylated peptide BPCs are highlighted in black, monoalkylated peptide BPCs are highlighted in red. Single asterisks mark BPC peaks of non-alkylated peptides, double asterisks mark BPC peaks of alkylated peptides.

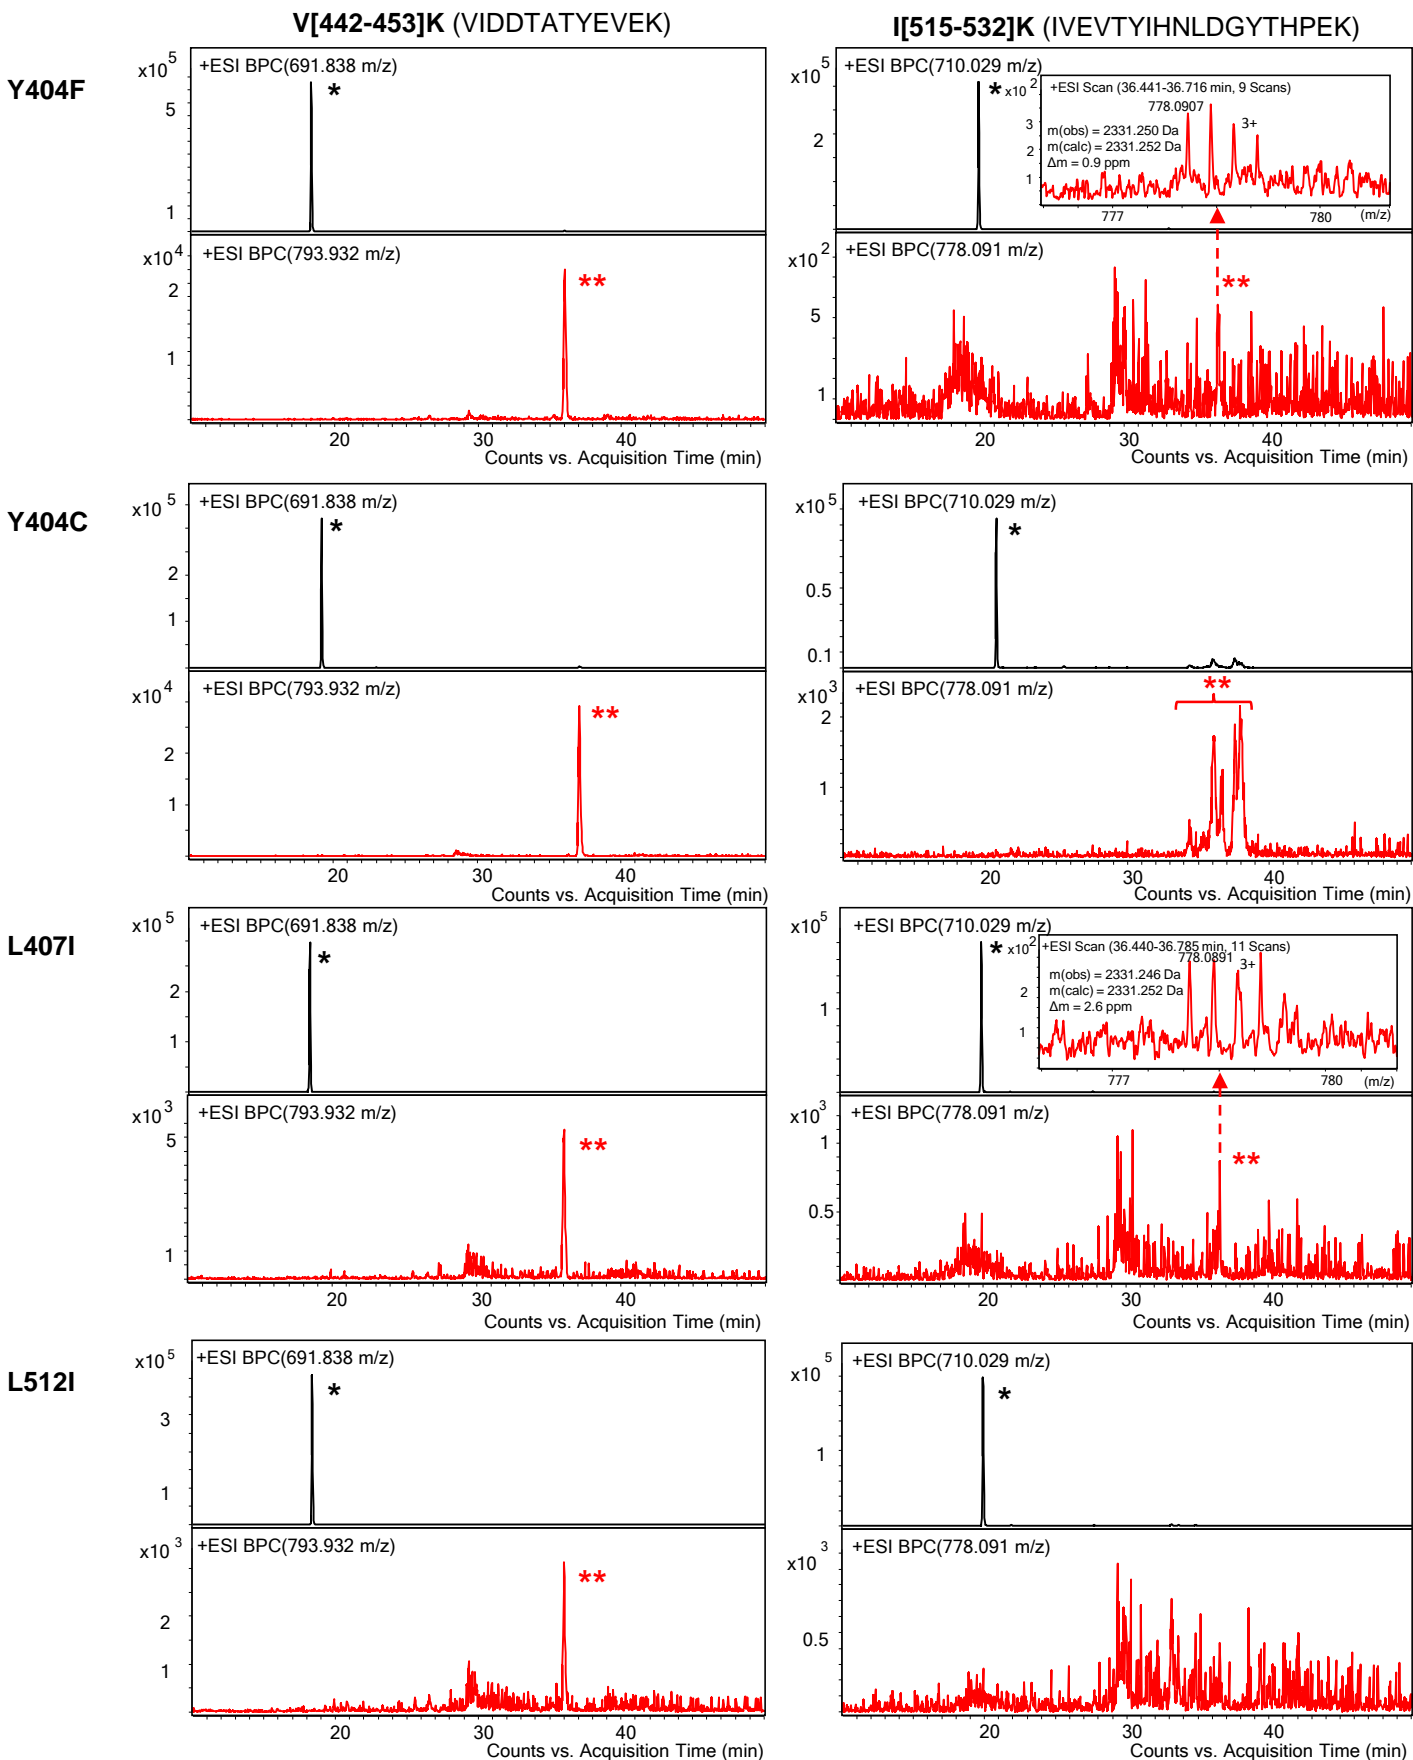

**Figure S3. Alkylation analysis of TEAS active site mutants by bottom-up proteomic LC-MS.** LC-MS analysis of nonalkylated and alkylated tryptic peptides V[442-453]K and I[515-532]K of TEAS active site mutants after reaction with (*E,E*)-FPP. Nonalkylated peptide BPCs are highlighted in black, monoalkylated peptide BPCs are highlighted in red. Single asterisks mark BPC peaks of non-alkylated peptides, double asterisks mark BPC peaks of alkylated peptides.

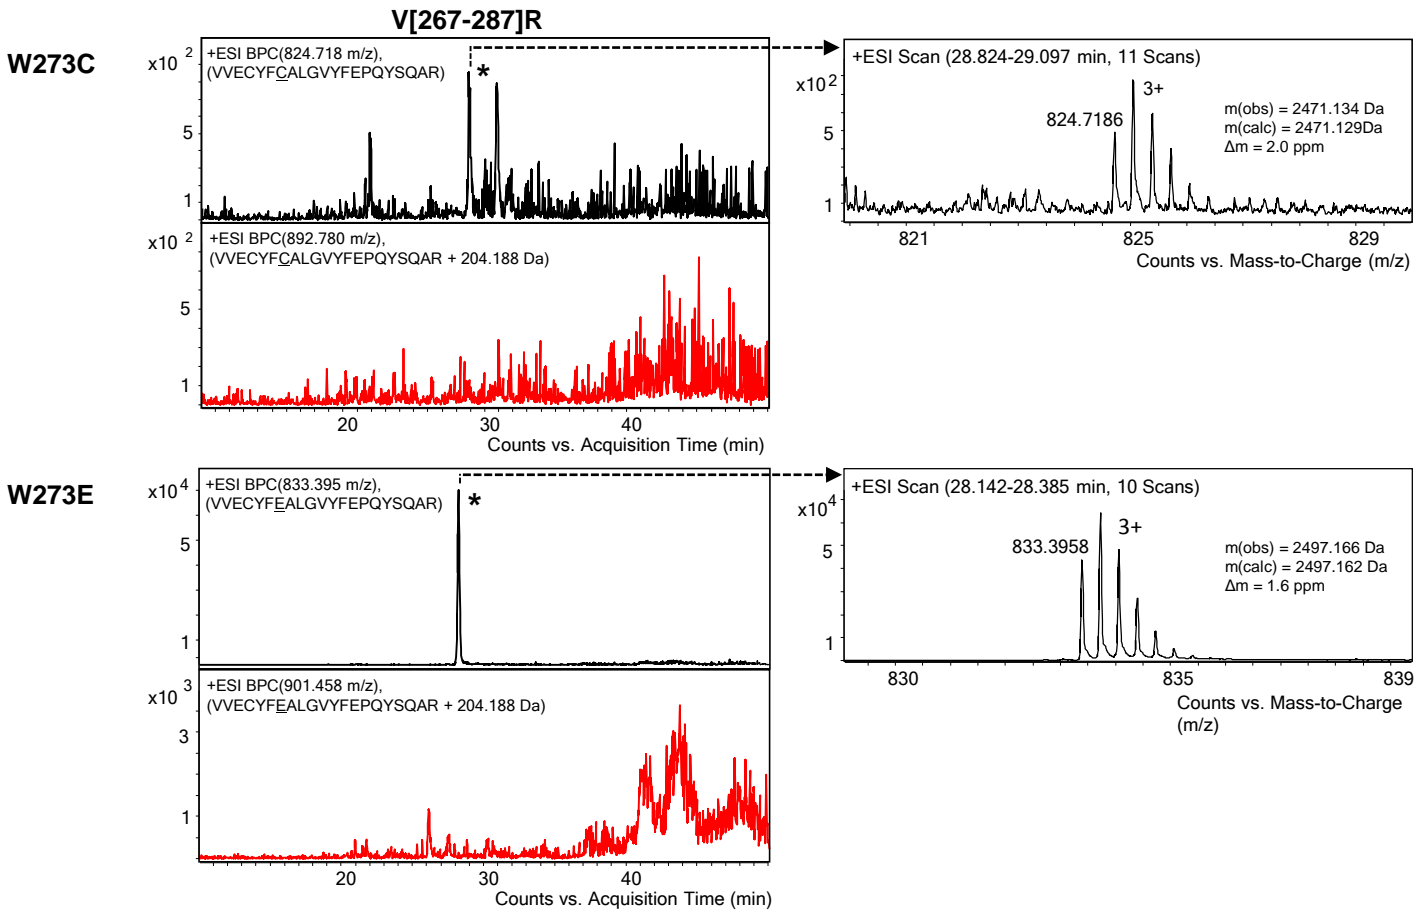

**Figure S3. Alkylation analysis of TEAS active site mutants by bottom-up proteomic LC-MS.** LC-MS and MS analysis of non-alkylated and alkylated tryptic peptide V[267-287]R of TEAS active site mutants W273C and W273E after reaction with (*E,E*)-FPP. Nonalkylated peptide BPCs are highlighted in black, monoalkylated peptide BPCs are highlighted in red. Single asterisks mark BPC peaks of nonalkylated peptides, double asterisks mark BPC peaks of alkylated peptides. No mass signals of nonalkylated or alkylated tryptic peptide N[375-416]K of TEAS Y404C were detected by LC-MS (data not shown).

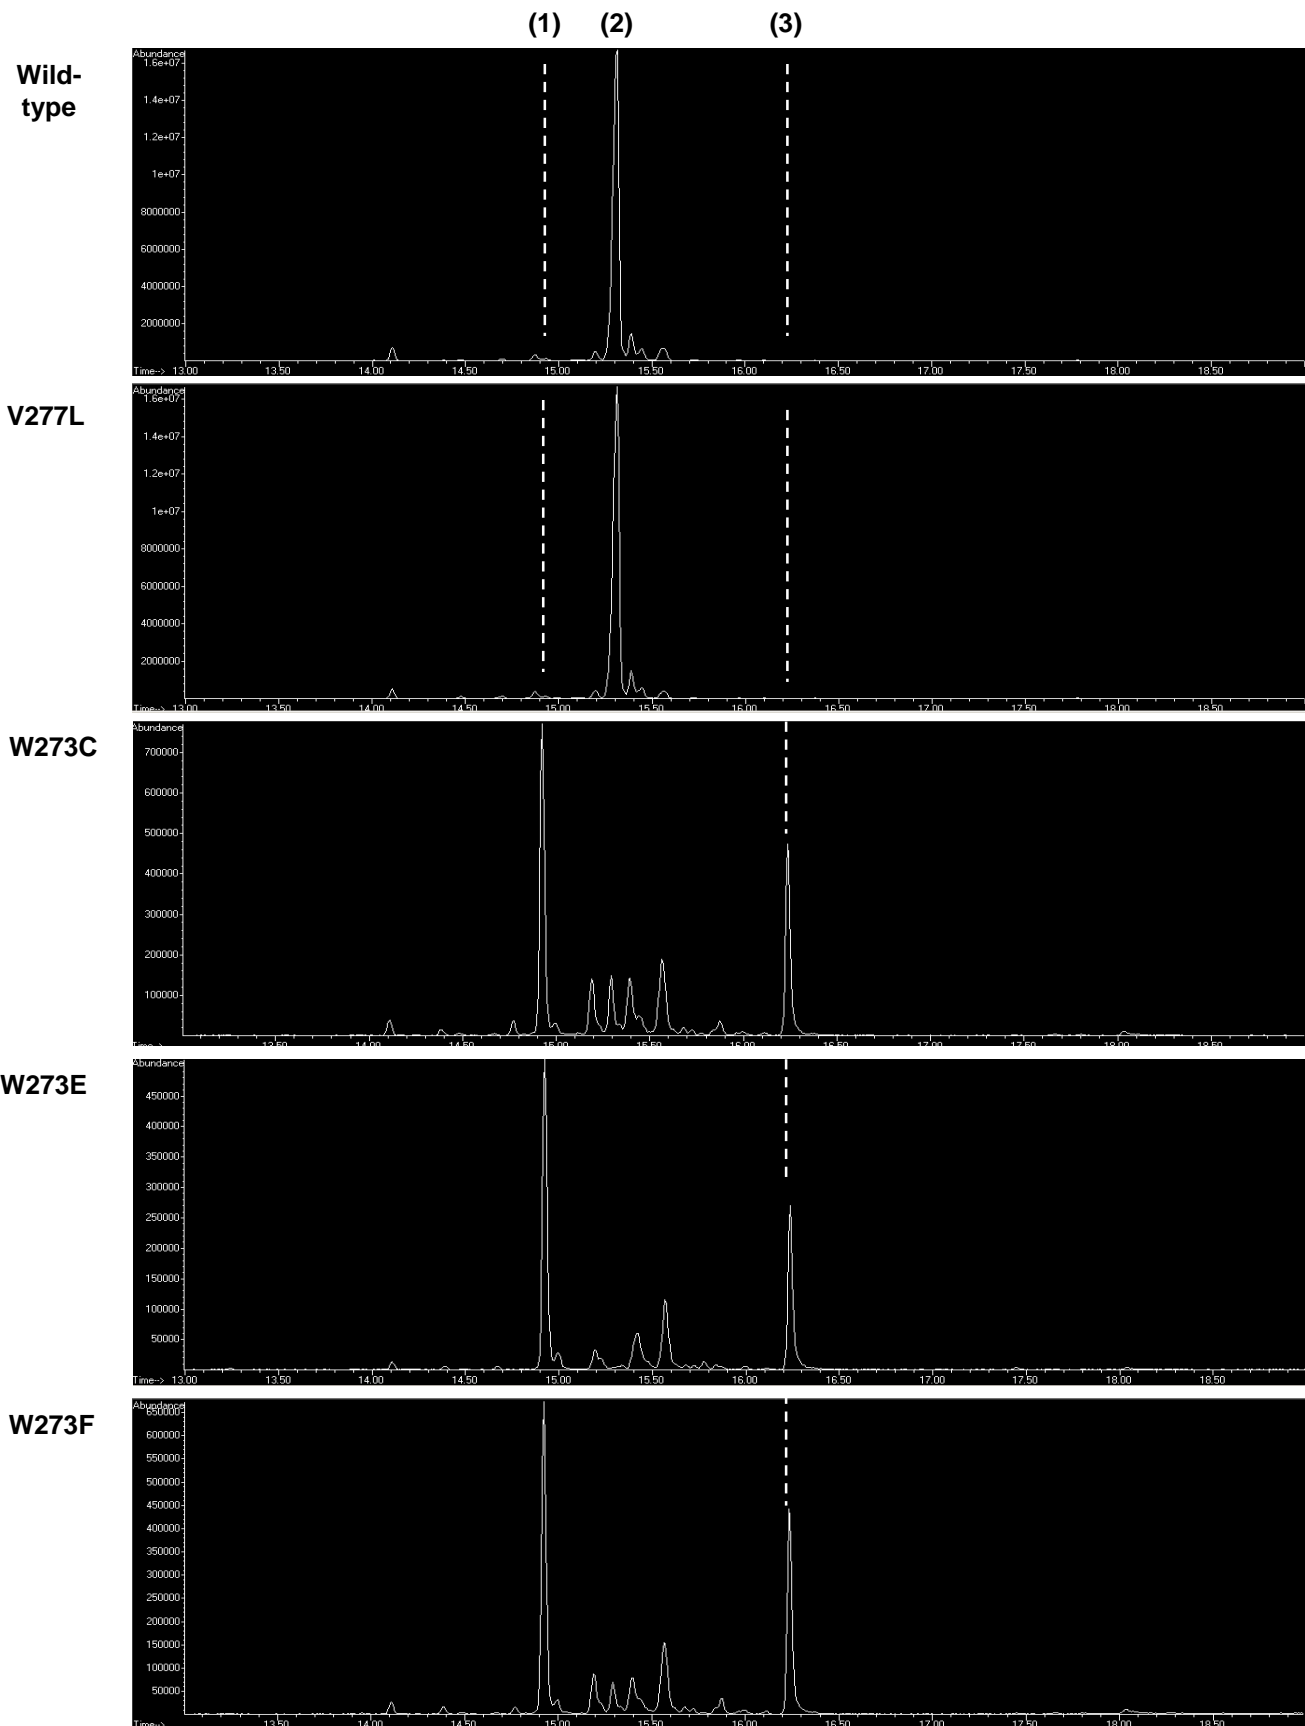

**Figure S4. GCMS analysis of product profiles of TEAS active site mutants after reaction with (*E,E*)-FPP.** Total ion chromatograms of hexane extracts of corresponding enzyme reactions are shown. Highlighted sesquiterpene products are  $\beta$ -farnesene (1), 5-*epi*-aristolochene (2) and farnesol (3).

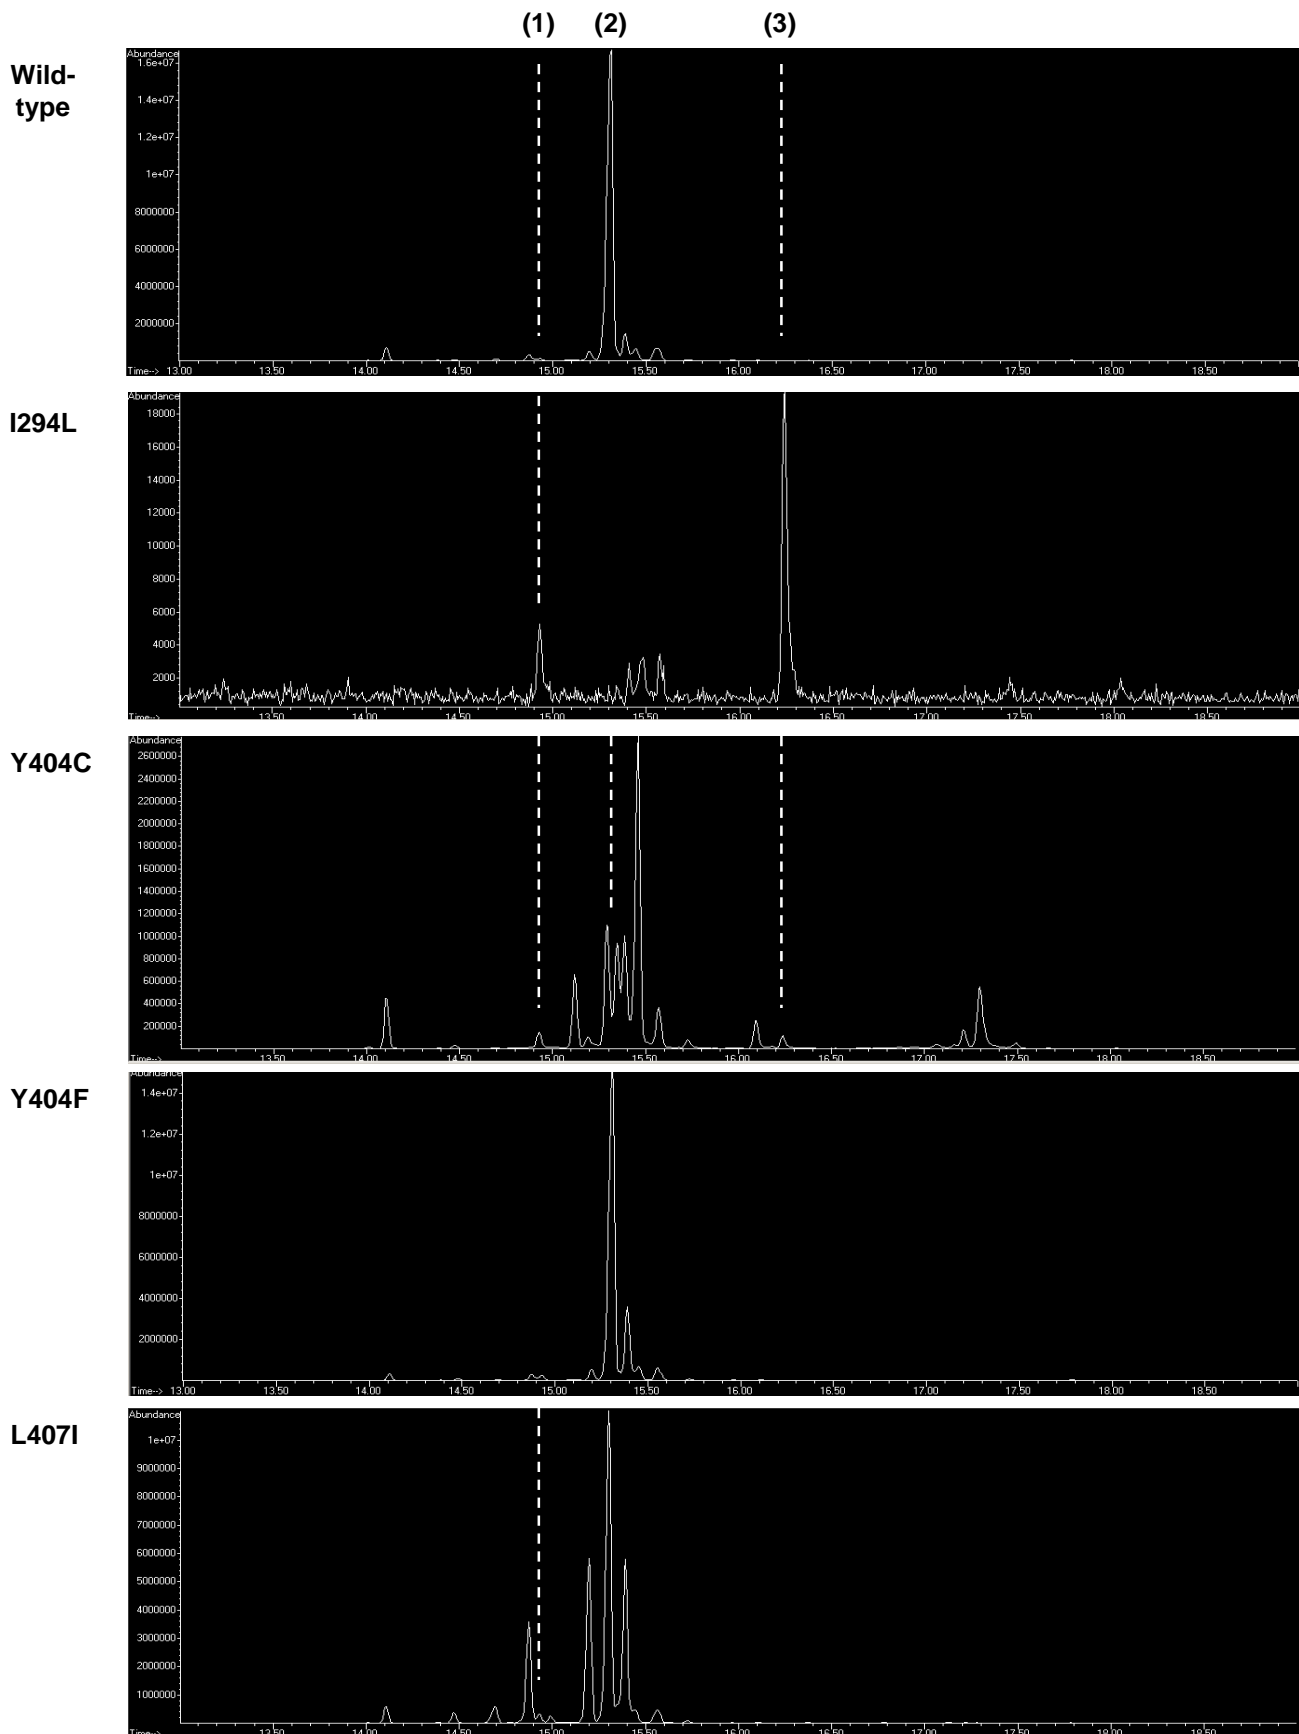

**Figure S4. GCMS analysis of product profiles of TEAS active site mutants after reaction with (*E,E*)-FPP.** Total ion chromatograms of hexane extracts of corresponding enzyme reactions are shown. Highlighted sesquiterpene products are  $\beta$ -farnesene (1), 5-*epi*-aristolochene (2) and farnesol (3).

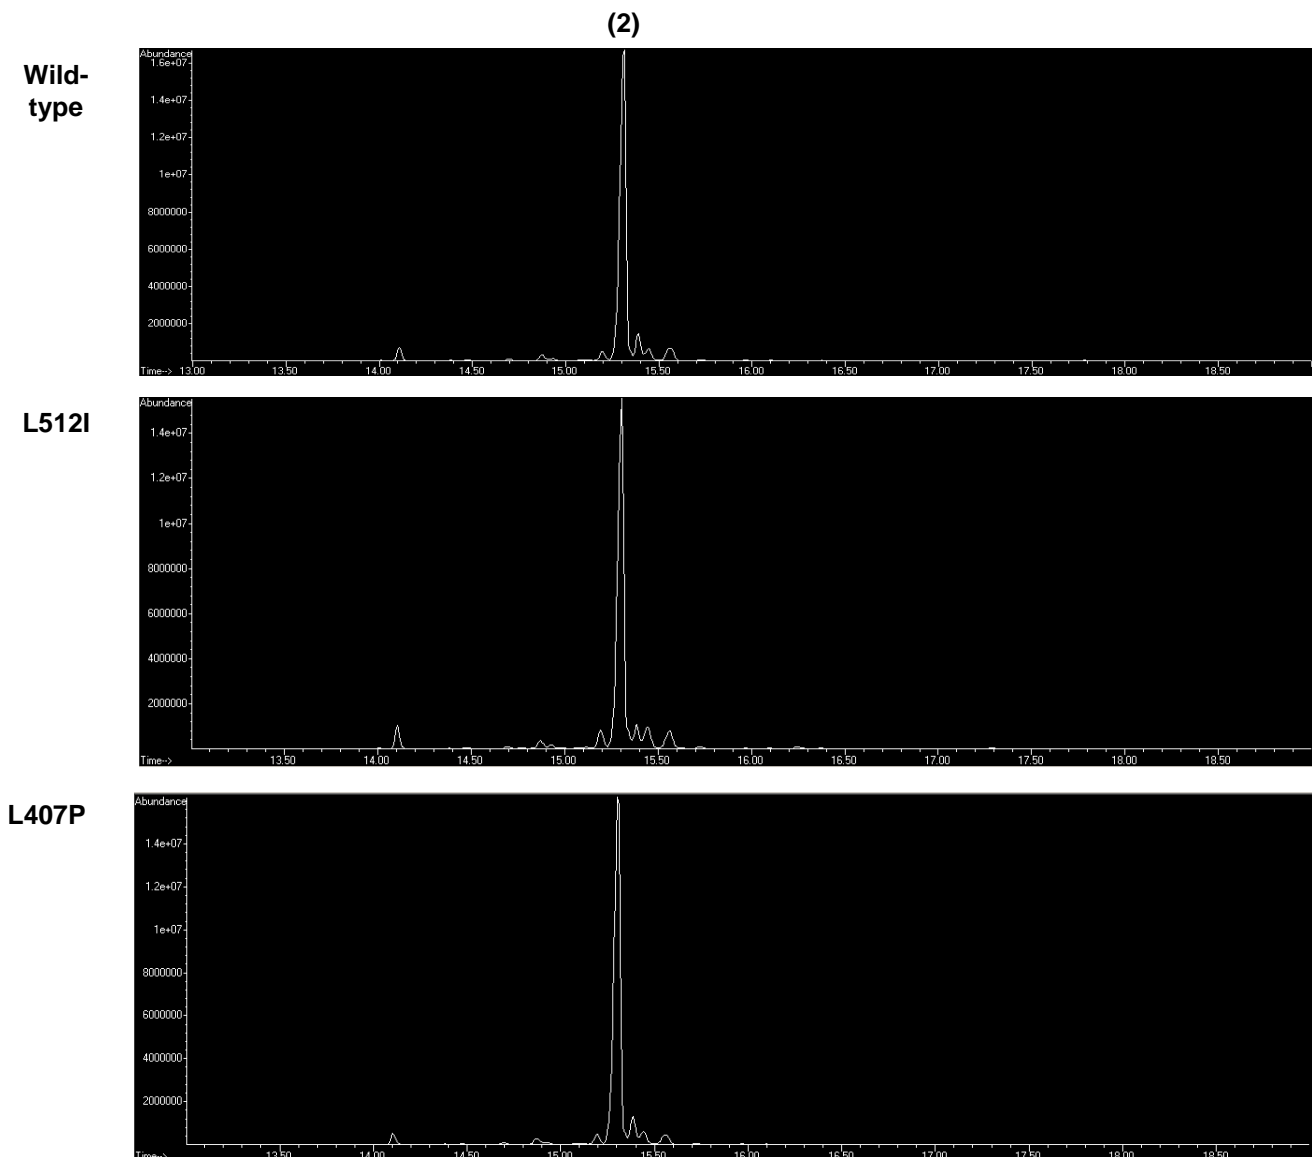

**Figure S4. GCMS analysis of product profiles of TEAS active site mutants after reaction with (*E,E*)-FPP.** Total ion chromatograms of hexane extracts of corresponding enzyme reactions are shown. Highlighted sesquiterpene products are  $\beta$ -farnesene (1), 5-*epi*-aristolochene (2) and farnesol (3).

**A**

BPC 691.83-691.85 m/z

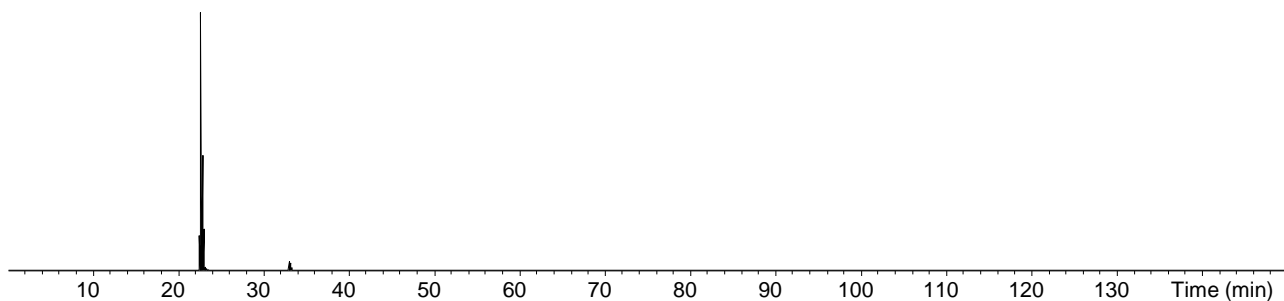**B**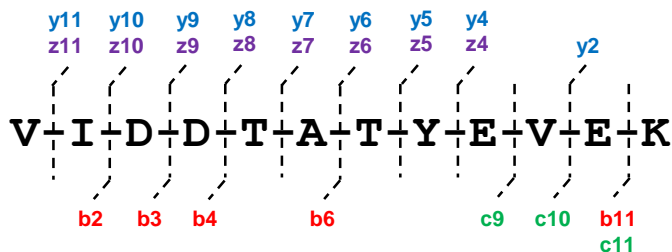

FTMS + c NSI d sa Full ms2 691.84@etd127.49 [120.00-1394.00] #1 RT: 22.96 AV: 1 NL: 5.85E5

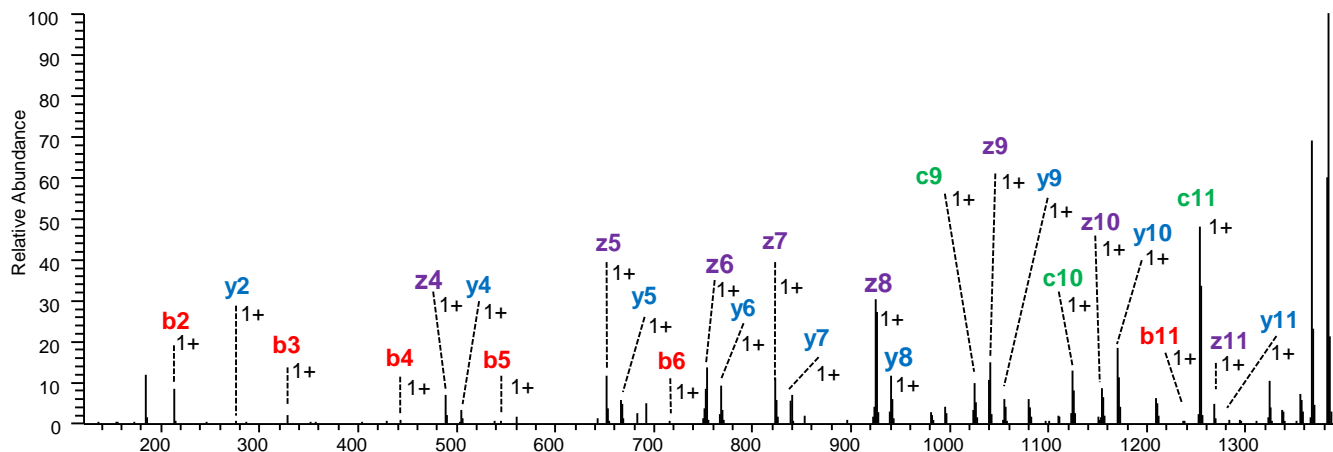

| Fragment | m(obs) [Da] | m(calc) [Da] | $\Delta$ m [Da] | $\Delta$ m [ppm] | Fragment | m(obs) [Da] | m(calc) [Da] | $\Delta$ m [Da] | $\Delta$ m [ppm] |
|----------|-------------|--------------|-----------------|------------------|----------|-------------|--------------|-----------------|------------------|
| b2       | 213.1580    | 213.1598     | 0.0018          | 8.4              | y7       | 839.405     | 839.4145     | 0.0095          | 11.3             |
| y2       | 276.1519    | 276.1554     | 0.0035          | 12.7             | z8       | 924.437     | 924.4435     | 0.0065          | 7.0              |
| b3       | 328.1833    | 328.1867     | 0.0034          | 10.4             | y8       | 940.4545    | 940.4622     | 0.0077          | 8.2              |
| b4       | 443.2116    | 443.2136     | 0.002           | 4.5              | c9       | 1025.4695   | 1025.4786    | 0.0091          | 8.9              |
| z4       | 488.2449    | 488.2477     | 0.0028          | 5.7              | z9       | 1039.463    | 1039.4704    | 0.0074          | 7.1              |
| y4       | 504.2642    | 504.2664     | 0.0022          | 4.4              | y9       | 1055.4797   | 1055.4891    | 0.0094          | 8.9              |
| b5       | 544.2599    | 544.2613     | 0.0014          | 2.6              | c10      | 1124.5396   | 1124.547     | 0.0074          | 6.6              |
| z5       | 651.3063    | 651.3110     | 0.0047          | 7.2              | z10      | 1154.4873   | 1154.4974    | 0.0101          | 8.8              |
| y5       | 667.3229    | 667.3297     | 0.0068          | 10.2             | y10      | 1170.5063   | 1170.5161    | 0.0098          | 8.4              |
| b6       | 716.3478    | 716.3461     | -0.0017         | 2.4              | b11      | 1236.5577   | 1236.563     | 0.0053          | 4.3              |
| z6       | 752.3532    | 752.3587     | 0.0055          | 7.3              | c11      | 1253.5815   | 1253.5896    | 0.0081          | 6.5              |
| y6       | 768.3741    | 768.3668     | -0.0073         | 9.5              | z11      | 1267.5804   | 1267.5814    | 0.001           | 7.9              |
| z7       | 823.3879    | 823.3958     | 0.0079          | 9.6              | y11      | 1283.6198   | 1283.6002    | -0.0196         | 15.0             |

**Figure S5. Characterization of alkylation site in TEAS W273E by EThcD-MS/MS. (A)** LC-MS analysis of nonalkylated tryptic peptide V[442-453]K of TEAS W273E after reaction with (*E,E*)-FPP. **(B)** EThcD-MS/MS analysis of nonalkylated tryptic peptide V[442-453]K of TEAS W273E after reaction with (*E,E*)-FPP.



C

BPC 793.93-793.94 m/z

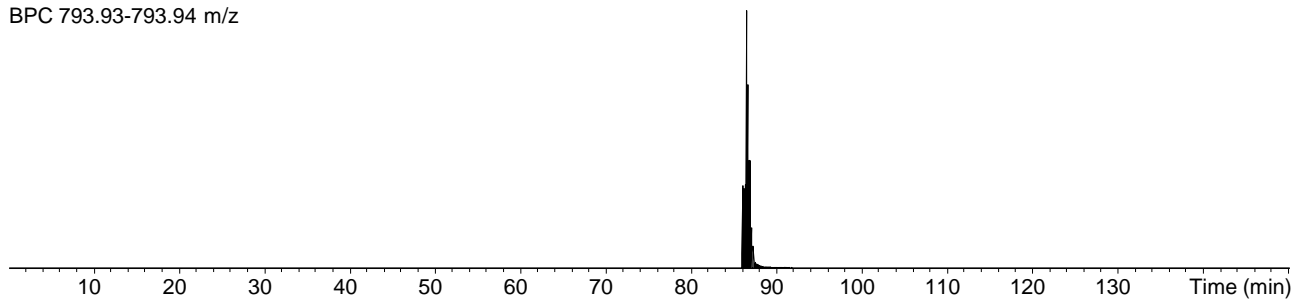

D

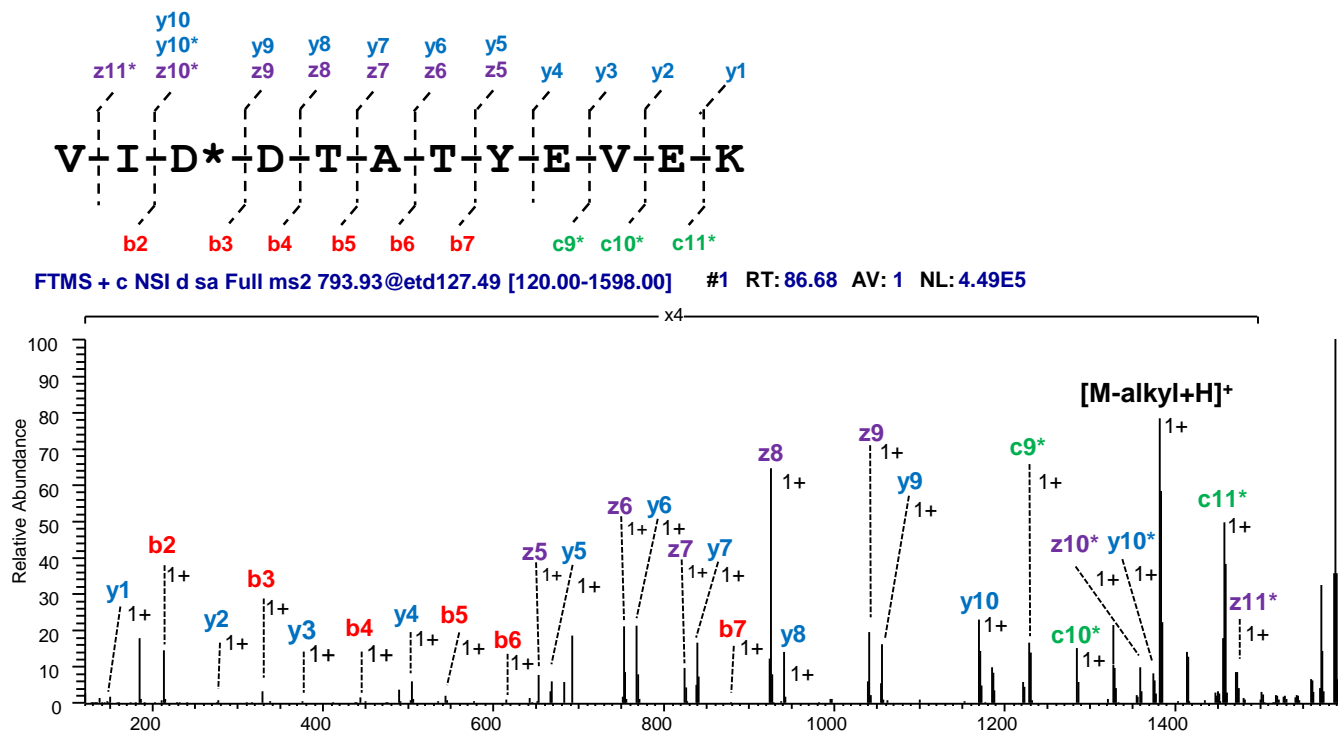

\* = +204.188Da

**Figure S5. Characterization of alkylation site in TEAS W273E by ETcD-MS/MS.** (C) LC-MS analysis of alkylated tryptic peptide V[442-453]K of TEAS W273E after reaction with (*E,E*)-FPP. (D) ETcD-MS/MS analysis of alkylated tryptic peptide V[442-453]K of TEAS W273E after reaction with (*E,E*)-FPP.

**E**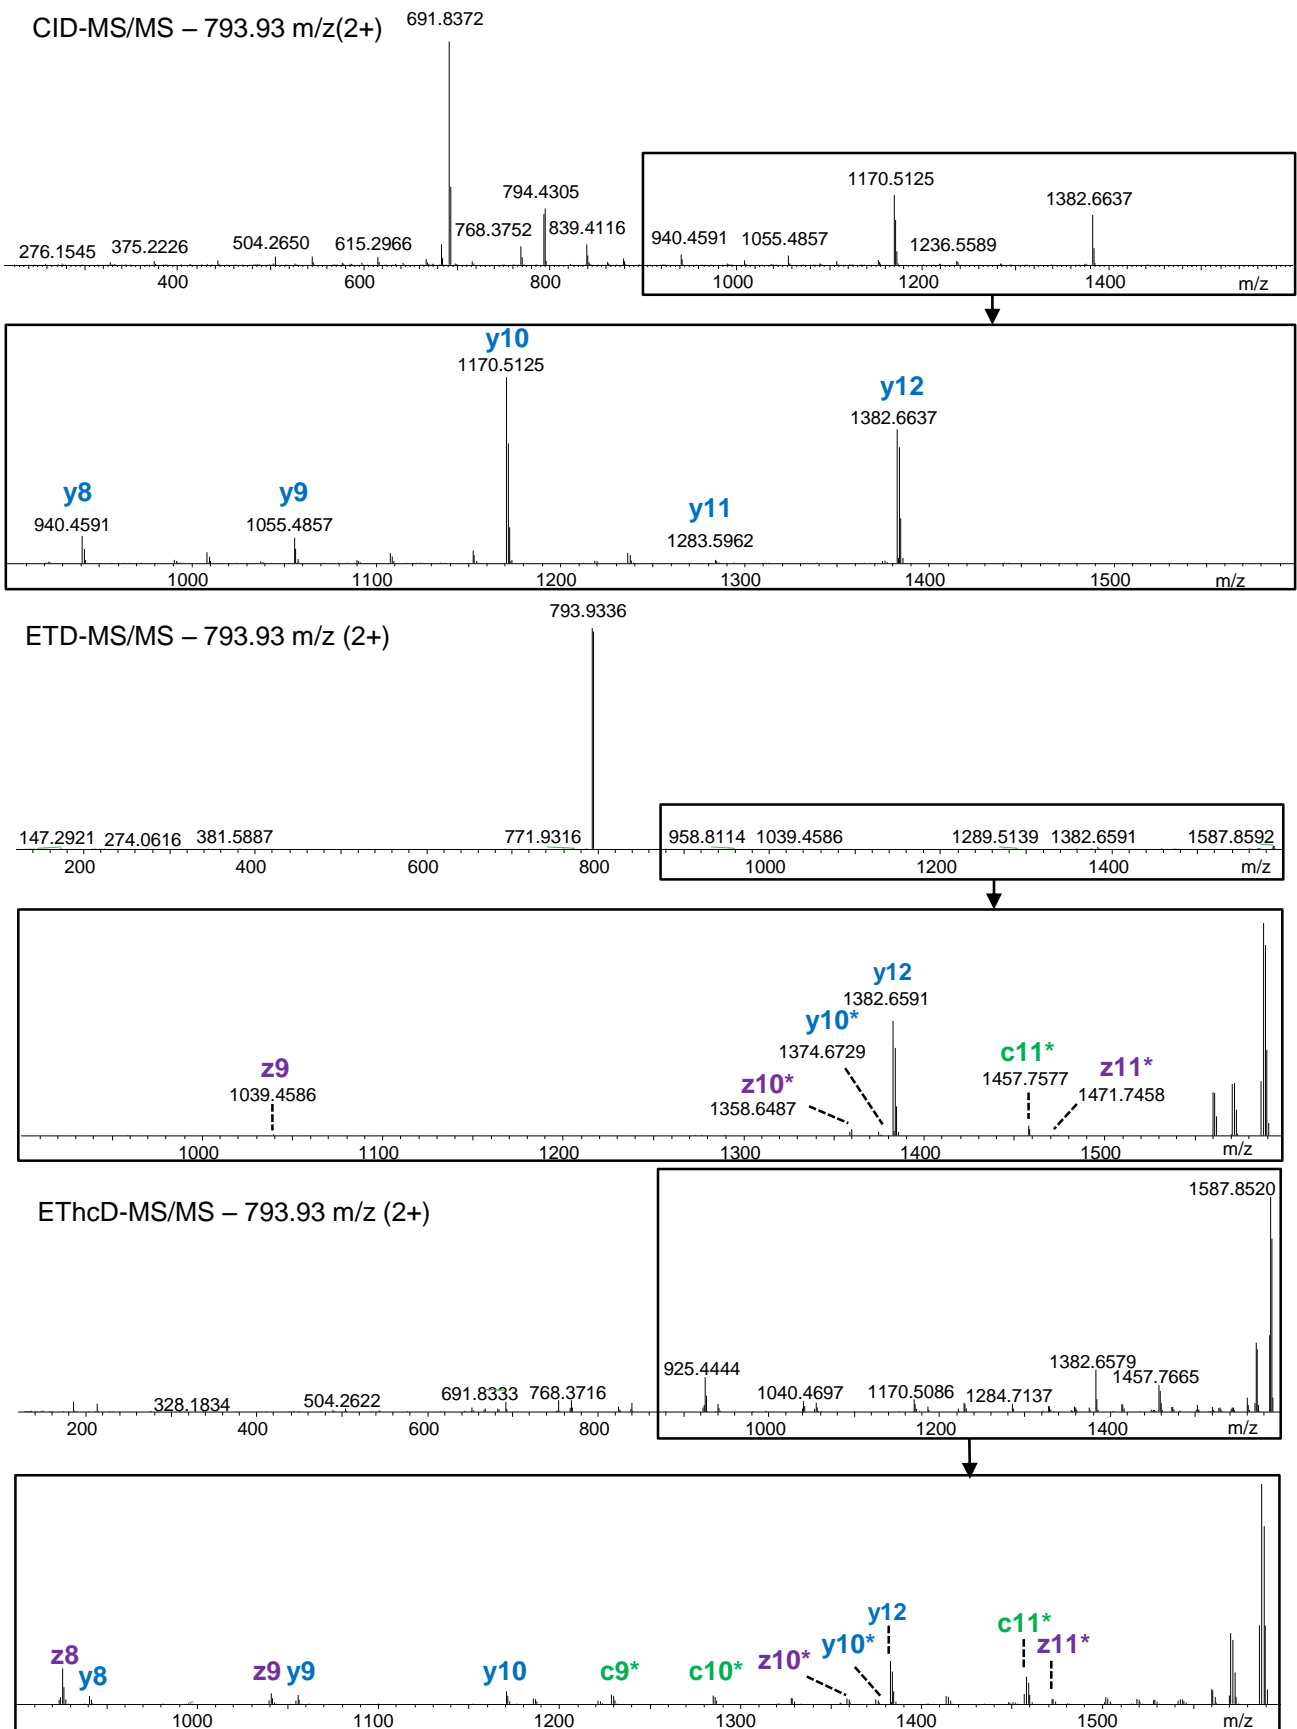

**Figure S5. Characterization of alkylation site in TEAS W273E by EThcD-MS/MS. (E)** Comparison of tandem mass spectrometry methods for characterization of alkylation modification on tryptic peptide V[442-453]K of TEAS W273E after reaction with (*E,E*)-FPP. Abbreviations: CID – collision induced dissociation, ETD – electron transfer dissociation, EThcD – electron-transfer and higher-energy collision dissociation, \* - peptide fragment with alkyl mass shift (204.188 Da).

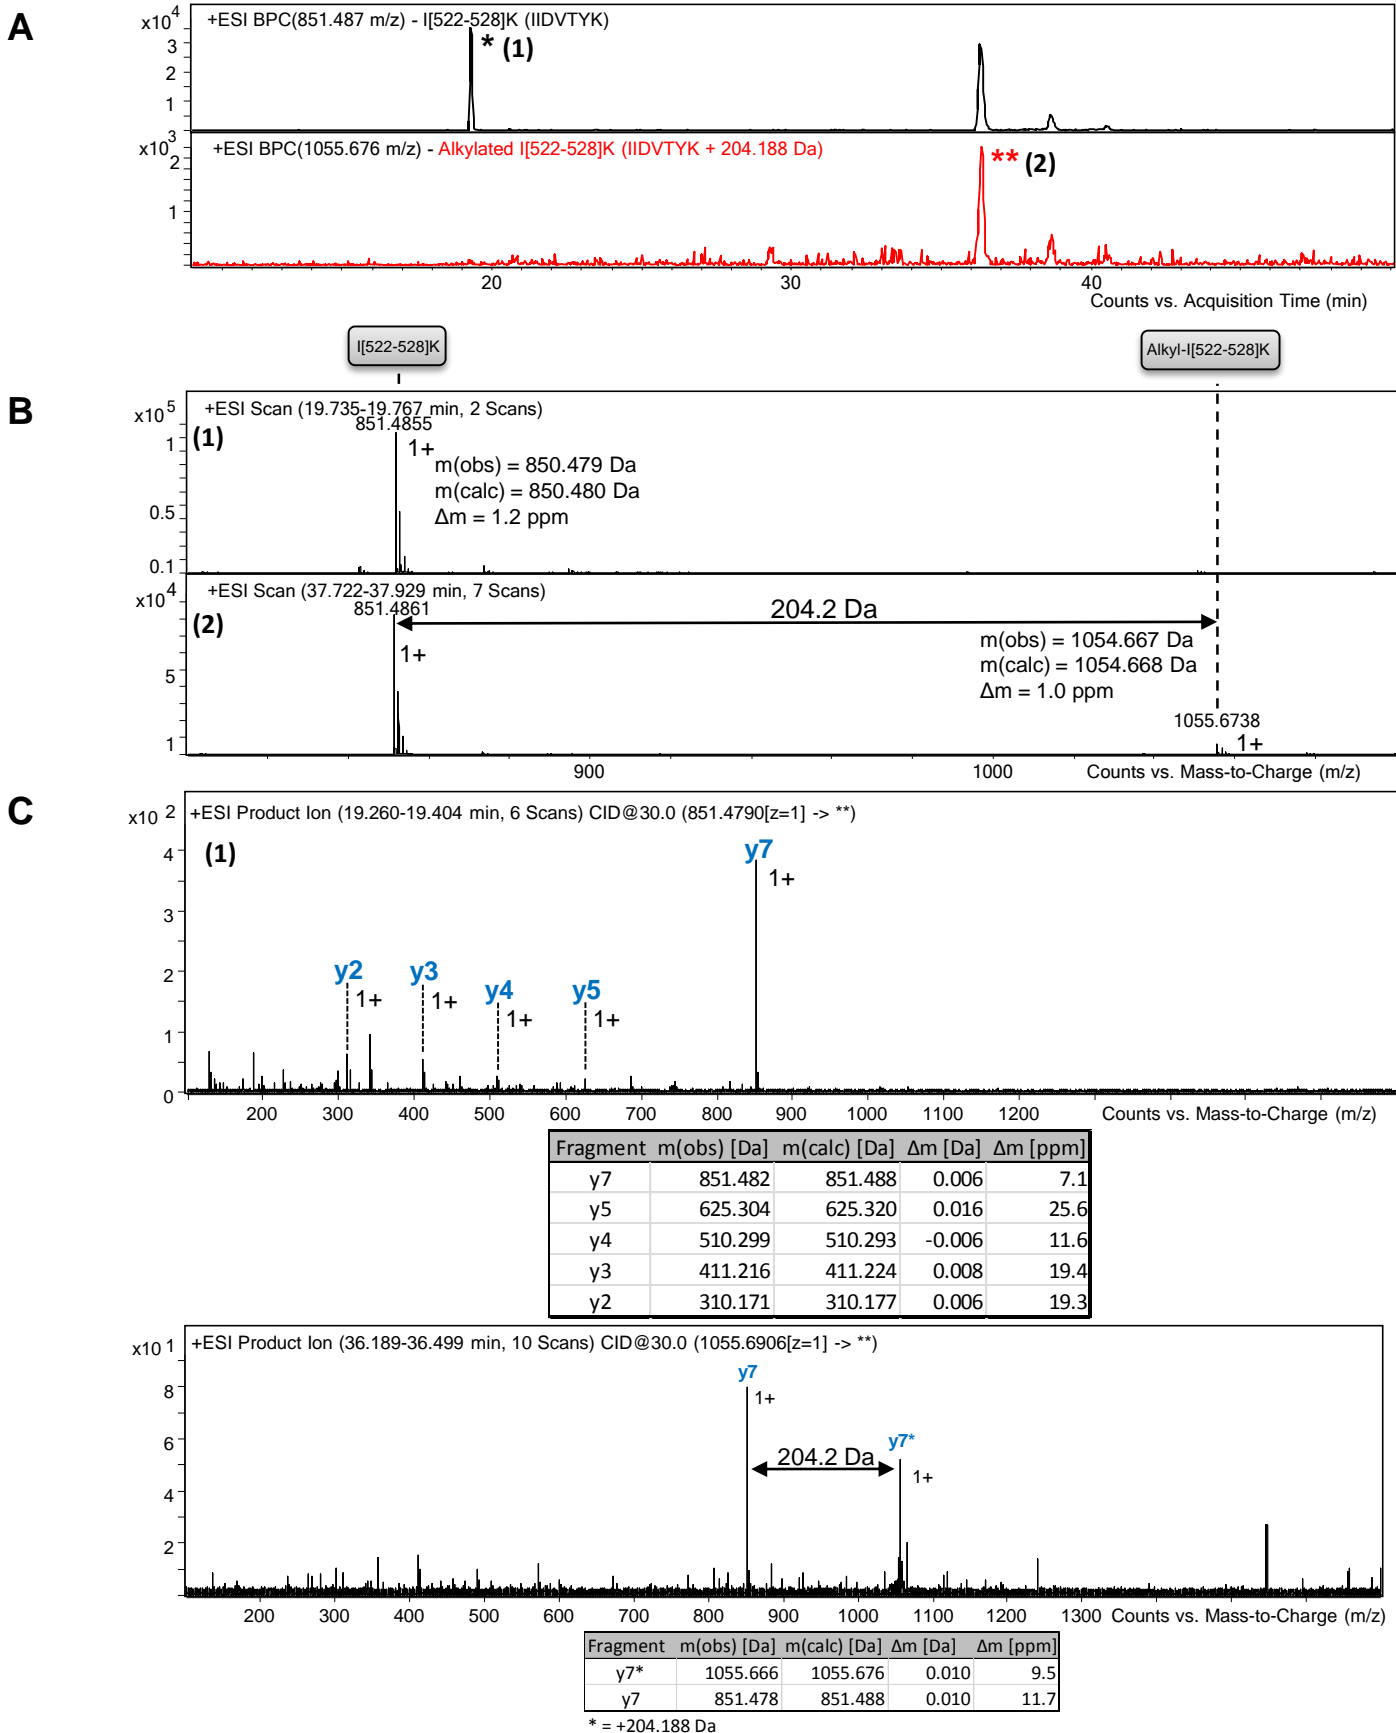

**Figure S6. Characterization of second alkylation site in tobacco 5-*epi*-aristolochene synthase (TEAS) through alkylation analysis of TEAS homologue *Hyoscyamus muticus* prenaspirodiene synthase (HPS). (A) LC-MS analysis of alkylated [522-528]K of HPS W280E after reaction with (*E,E*)-FPP. Single asteriks mark BPC peaks of nonalkylated peptides, double asteriks mark BPC peaks of alkylated peptides. (B) MS analysis of nonalkylated (1) and alkylated (2) [522-528]K of HPS W280E after reaction with FPP. (C) MS/MS analysis of nonalkylated (1) and alkylated (2) [522-528]K of HPS W280E after reaction with FPP.**

**D**

```

TEAS      MASAAVAN--YEEIIVRPVADFSPSLWGDQFLSFSIKNQVAEKYAKEIEALKEQTRNML- 57
HPS      MAPAIVMSNYEEEEIIVRPVADFSPSLWGDRFHSHFSVDNQVAEKYAEIETLKEQTSTMLS 60
          **.* * . *****:* **:.*****:***:***** .*

TEAS      LATGMKLADTLNLIIDTIERLGLISYHFEKEIDDILDQIYNQN-----SNCNDLCTSAIQFR 112
HPS      AACGTTLTKLNLIDIIERLGIAYHFEKQIEDMLDHIYRADPYFEAHEYNDLNTSSVQFR 120
          * * .*:.* ***** *****:*:*:*:*:*:* * : : *** *:*:***

TEAS      LLRQHGFNISPEIFSKFQDENGKFKESLASDVLGLLNLYEASHVRTHADDILEDALAFST 172
HPS      LLRQHGYNVSPNIFSRFQDANGKFKESLRSDIRGLLNLYEASHVRTHKEDILEEALVFSV 180
          *****:*:*:*:*:*:* ***** ** : ***** :*****:*:*:*.*

TEAS      IHLESAAPHLKSPLRQVTHALEQCLHKGVPVETRFVFISSIIDYKEQSKNNVLLRFAKLD 232
HPS      GHLESAAPHLKSPLSKQVTHALEQSLHKSIPRVEIRYFIS-IYEEEFKNDLLRFAKLD 239
          ***** :*****.***.:*** *:*** *:*:* :*:*****

TEAS      FNLLQMLHKQELAQVSRWKKDLDFVTTLPYARDRVVECYFALGVYFEPQYSQARVMLVK 292
HPS      YNLLQMLHKHELSEVSRWKKDLDFVTTLPYARDRAVECYFTMGVYAEPQYSQARVMLAK 299
          :*****:*:*:*:*:******.******:.* ** *****.*

TEAS      TISMISIVDDTFDAYGTVKELEAYTDAIQRWDINEIDRLPDYMKISYKAILDLYKDYEKE 352
HPS      TIAMISIVDDTFDAYGIVKELEVYTDIAIQRWDISQIDRLPEYMKISYKALLDLYDDYEKE 359
          **:****** *****.******.:*****:*****:*****.*****

TEAS      LSSAGRSHIVCHAIERMKEVVRNYNVESTWFIEGYTPPVSEYLSNALATTTYYLATTSY 412
HPS      LSKDGRSDVHVYAKERMKEIVRNYFIEAKWFIEGYMPSVSEYLSNALATSTYLLTTTSY 419
          **.* **.*:* * *****:***** :*:****** *.*****:*** *:*:*

TEAS      LGMKSATEQDFEWLSKNPKILEASVIICRVIDDTATYEVEKSRGQIATGIECCMRDYGIS 472
HPS      LGMKSATKEHFEWLATNPKILEANATLCRVVDDIATYEVEKGRGQIATGIECYMRDYGVS 479
          *****:*.***.* *****.* :***:* *****.****** *****:*

TEAS      TKEAMAKFQNMAETAWKDINEGLLRPTVPSTEFLLTPILNLRIVEVTYIHNLDGYTHPEK 532
HPS      TEVAMEKFQEMADIWAKDVNEEILRPTVPSSEILTRILNLRIDVTKHNDQGYTHPEK 539
          *:* ** ***:*:* *****:* :*****:*:* *****:*:* ** *****

TEAS      VLKPHIINLLVDSIKI 548
HPS      VLKPHIIALVVDSDI 555
          ***** *:*:*.*

```

**Figure S6. Characterization of second alkylation site in tobacco 5-*epi*-aristolochene synthase (TEAS) through alkylation analysis of TEAS homologue *Hyoscyamus muticus* prenaspirodiene synthase (HPS). (D) Sequence alignment of TEAS and HPS with highlighted W→E mutation site (green) and the tryptic peptide (blue) with the putative second alkylation site (red).**

**A**

| # | Contig<br>(GenBank) | Length<br>[aa] | Protein sequence<br>similarity/identity<br>with TEAS [%/%) | Active site residues (wild-type TEAS positions) |     |     |     |     |     |     |     |     |     |     |     |     |     |     |     | M9 residues (wild-type TEAS positions) |     |     |     |     |     | Note |     |                                                                               |
|---|---------------------|----------------|------------------------------------------------------------|-------------------------------------------------|-----|-----|-----|-----|-----|-----|-----|-----|-----|-----|-----|-----|-----|-----|-----|----------------------------------------|-----|-----|-----|-----|-----|------|-----|-------------------------------------------------------------------------------|
|   |                     |                |                                                            | 273                                             | 277 | 301 | 305 | 401 | 404 | 407 | 441 | 444 | 448 | 452 | 512 | 520 | 525 | 527 | 274 | 291                                    | 372 | 402 | 406 | 436 | 438 |      | 439 | 516                                                                           |
| 1 | AWOK01001025        | 550            | 99/99                                                      | W                                               | V   | D   | D   | T   | Y   | L   | R   | D   | T   | E   | L   | Y   | D   | Y   | A   | V                                      | V   | T   | Y   | S   | I   | I    | V   | wild-type TEAS                                                                |
| 2 | AWOK01127688        | 548            | 97/95                                                      | W                                               | V   | D   | D   | T   | Y   | L   | R   | D   | T   | E   | L   | Y   | D   | Y   | A   | V                                      | V   | T   | Y   | S   | I   | I    | V   |                                                                               |
| 3 | AWOK01250557        | 548            | 97/95                                                      | W                                               | V   | D   | D   | T   | Y   | L   | R   | D   | T   | E   | L   | Y   | D   | Y   | A   | V                                      | V   | T   | Y   | S   | I   | I    | V   |                                                                               |
| 4 | AWOK01009162        | 555            | 91/82                                                      | W                                               | V   | D   | D   | T   | Y   | L   | R   | D   | T   | E   | L   | Y   | D   | Y   | T   | A                                      | I   | S   | L   | N   | T   | L    | I   | TEAS M9 mutant                                                                |
| 5 | AWOK01139108        | 548            | 90/82                                                      | W                                               | V   | D   | D   | T   | Y   | C   | R   | D   | T   | E   | F   | Y   | D   | Y   | A   | T                                      | L   | S   | S   | S   | I   | L    | V   | 3 internal stop codons (R208*, R266*, W323*)                                  |
| 6 | AWOK01416821        | 349*           | 96/95                                                      | W                                               | V   | D   | D   | T   | Y   | P   | R   | D   | T   | E   | L   | Y   | D   | Y   | A   | V                                      | V   | T   | Y   | S   | I   | I    | V   | N-terminal domain truncated (1-199),<br>2 internal stop codons (Y376*, Y520*) |

**B**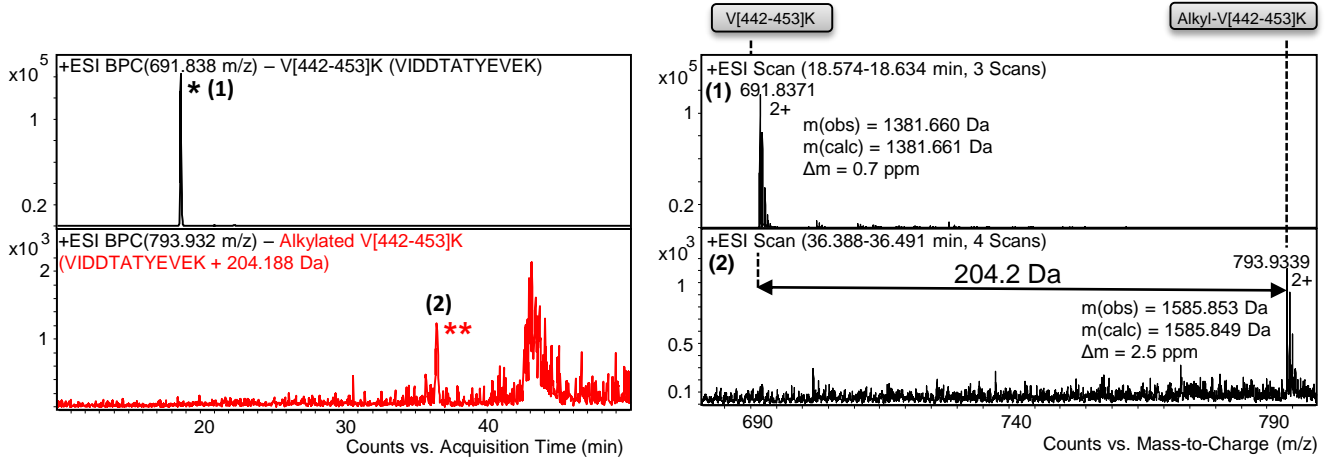

**Figure S7. Genome mining of *Nicotiana tabacum* Basma Xanthi for self-alkylating TEAS gene homologues. (A)** The genome search revealed a gene of a N-terminally truncated, inactivated TEAS homologue with an active site mutation that caused self-alkylation in the corresponding TEAS mutant **(B)**. Single asteriks mark BPC peaks of nonalkylated peptides, double asteriks mark BPC peaks of alkylated peptides.

**A**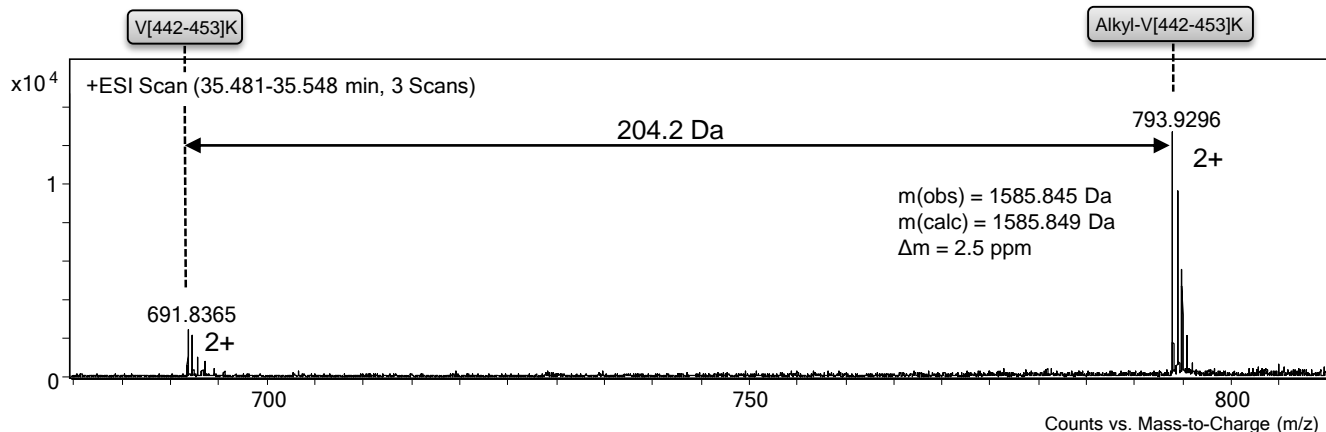**B**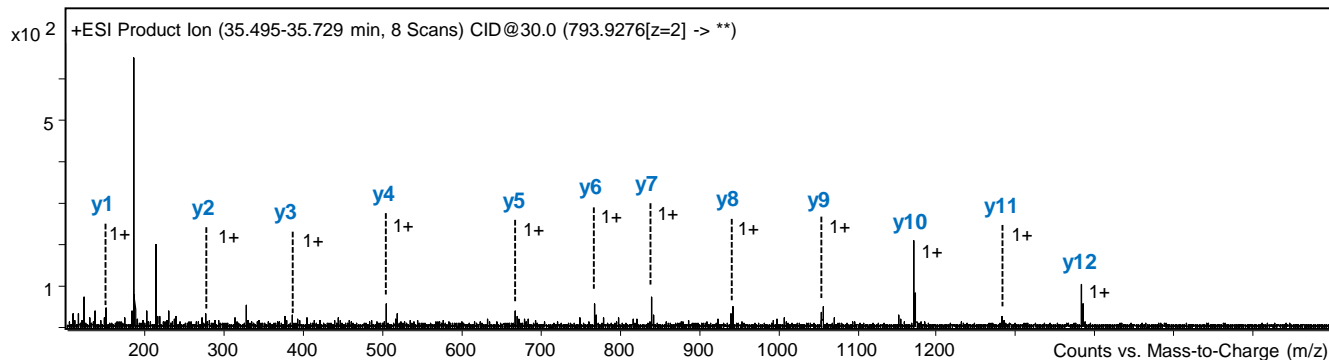

| Fragment | m(obs) [Da] | m(calc) [Da] | Δm [Da] | Δm [ppm] | Fragment | m(obs) [Da] | m(calc) [Da] | Δm [Da] | Δm [ppm] |
|----------|-------------|--------------|---------|----------|----------|-------------|--------------|---------|----------|
| y1       | 147.11      | 147.113      | -0.003  | 20.4     | y7       | 839.411     | 839.415      | -0.004  | 4.8      |
| y2       | 276.151     | 276.156      | -0.005  | 18.1     | y8       | 940.452     | 940.463      | -0.011  | 11.7     |
| y3       | 375.218     | 375.224      | -0.006  | 16.0     | y9       | 1055.468    | 1055.490     | -0.022  | 20.8     |
| y4       | 504.264     | 504.267      | -0.003  | 6.0      | y10      | 1170.515    | 1170.517     | -0.002  | 1.7      |
| y5       | 667.329     | 667.330      | -0.001  | 1.5      | y11      | 1283.575    | 1283.601     | -0.026  | 20.3     |
| y6       | 768.379     | 768.378      | 0.001   | 1.3      | y12      | 1382.654    | 1382.669     | -0.015  | 10.8     |

**C**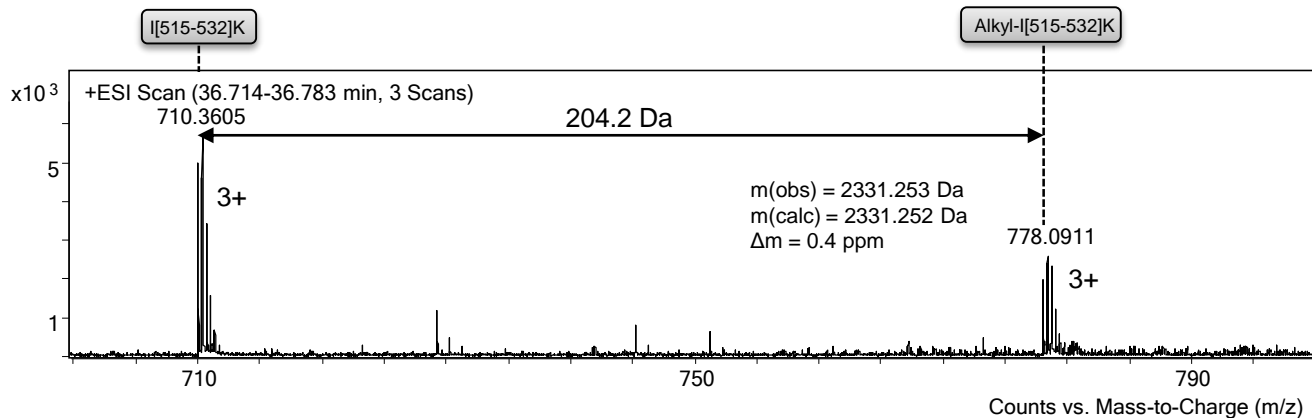

**Figure S8. Alkylation analysis of wild-type TEAS with substrate analogues and with (*E,E*)-FPP at increased reaction temperatures. (A) MS spectrum of alkylated tryptic peptide V[442-453]K of wild-type TEAS after reaction with SPP. (B) MS/MS analysis of alkylated V[442-453]K of wild-type TEAS after reaction with sesquialvandulyl diphosphate (SPP). (C) MS spectrum of alkylated tryptic peptide I[515-532]K of wild-type TEAS after reaction with SPP.**

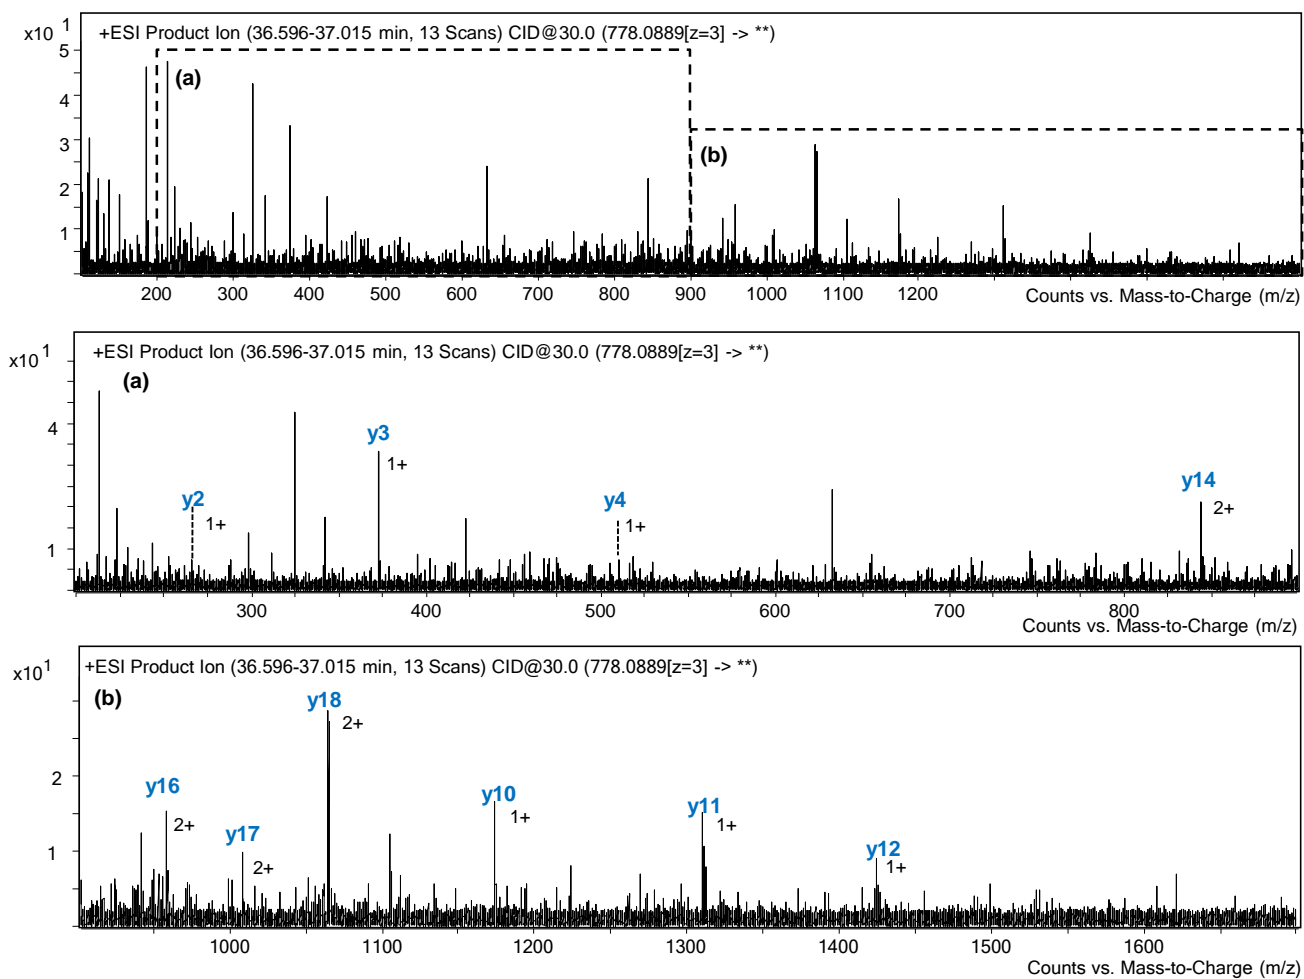

| Fragment | m(obs) [Da] | m(calc) [Da] | $\Delta$ m [Da] | $\Delta$ m [ppm] | Fragment | m(obs) [Da] | m(calc) [Da] | $\Delta$ m [Da] | $\Delta$ m [ppm] |
|----------|-------------|--------------|-----------------|------------------|----------|-------------|--------------|-----------------|------------------|
| y2       | 276.149     | 276.156      | -0.007          | 26.8             | y12      | 1423.686    | 1423.697     | -0.011          | 8.1              |
| y3       | 373.206     | 373.209      | -0.003          | 7.8              | y14      | 1687.812    | 1687.808     | 0.004           | 2.4              |
| y4       | 510.262     | 510.268      | -0.006          | 11.6             | y16      | 1915.913    | 1915.919     | -0.006          | 3.1              |
| y10      | 1173.557    | 1173.554     | 0.003           | 2.6              | y17      | 2015.029    | 2014.988     | 0.041           | 20.3             |
| y11      | 1310.612    | 1310.613     | -0.001          | 1.1              | y18      | 2128.065    | 2128.072     | -0.007          | 3.3              |

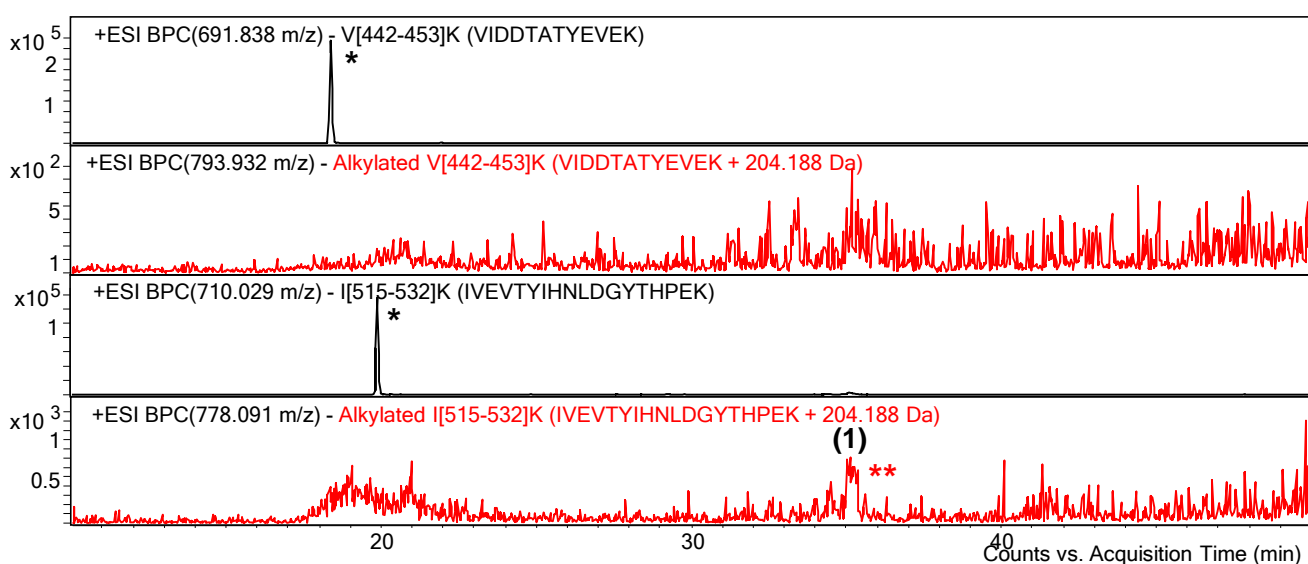

**Figure S8. Alkylation analysis of wild-type TEAS with substrate analogues and with (*E,E*)-FPP at increased reaction temperatures. (D) MS/MS analysis of alkylated I[515-532]K of wild-type TEAS after reaction with SPP. (E) LC-MS analysis of non-alkylated and alkylated tryptic peptides V[442-453]K and I[515-532]K of wild-type TEAS after reaction with (*Z,E*)-FPP. Single asterisks mark BPC peaks of nonalkylated peptides, double asterisks mark BPC peaks of alkylated peptides.**

**F**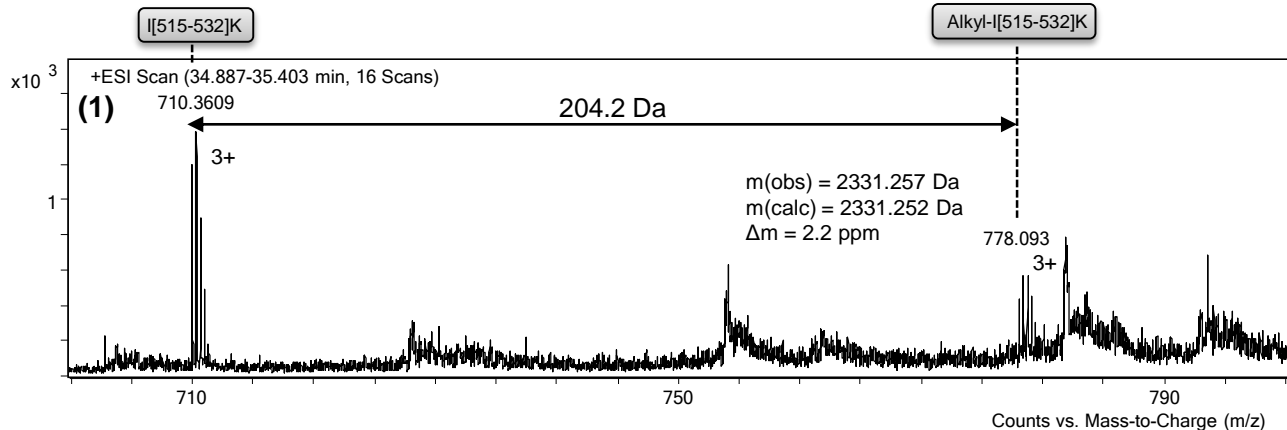**G****25°C**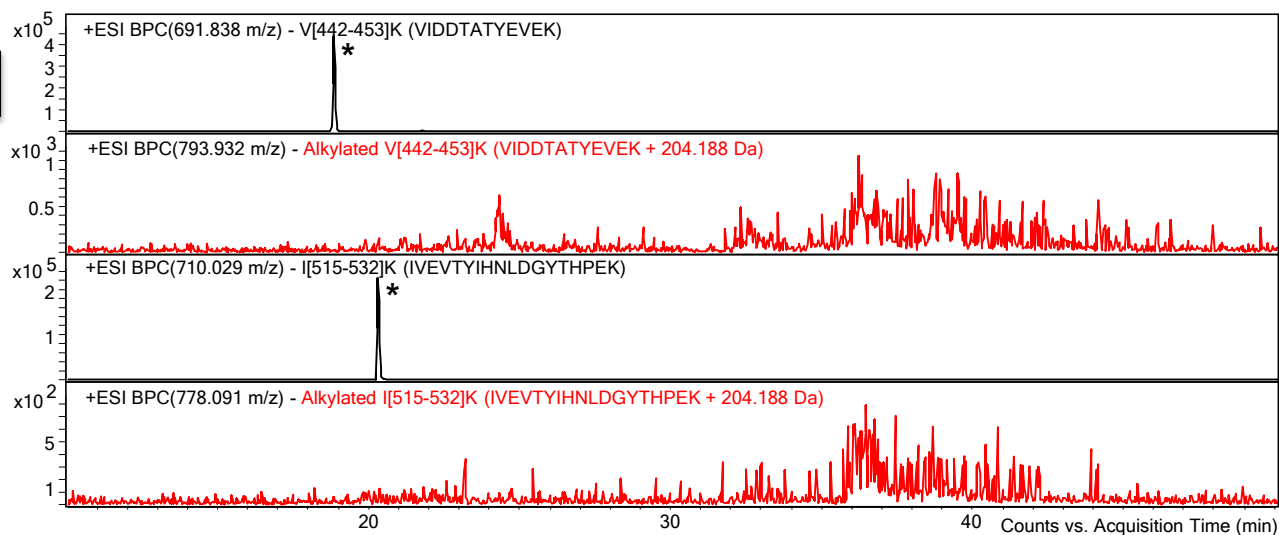**37°C**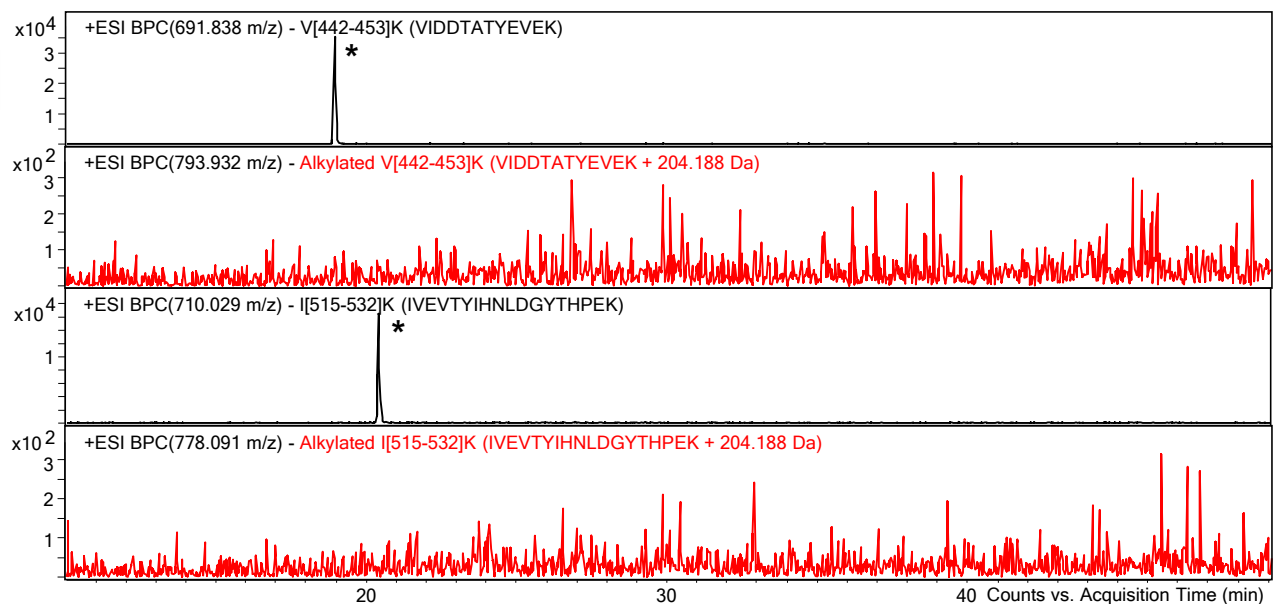

**Figure S8. Alkylation analysis of wild-type TEAS with substrate analogues and with (E,E)-FPP at increased reaction temperatures. (F)** MS spectrum of alkylated I[515-532]K of wild-type TEAS (1) after reaction with (Z,E)-FPP. **(G)** LC-MS analysis of nonalkylated and alkylated V[442-453]K and I[515-532]K of wild-type TEAS after reaction with (E,E)-FPP at 25°C, at 37°C and at 42°C. Single asterisks mark BPC peaks of nonalkylated peptides, double asterisks mark BPC peaks of alkylated peptides.



**G,**  
continued

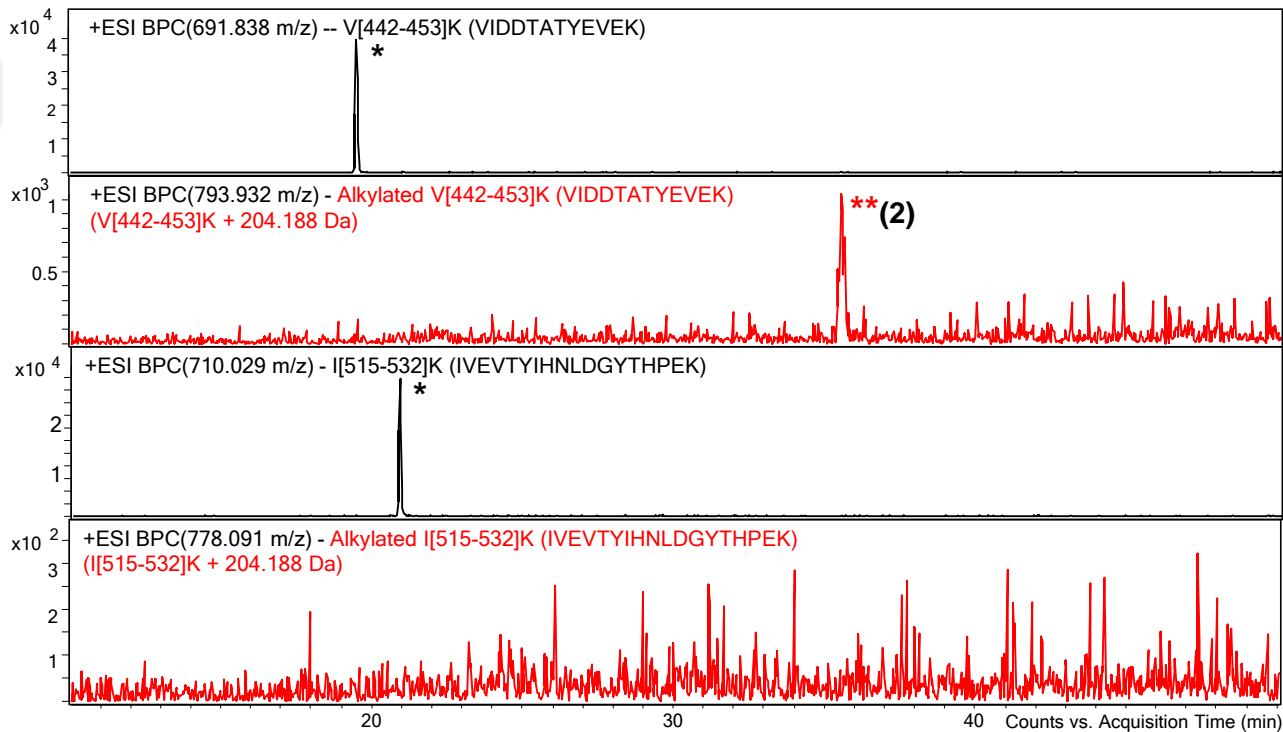

**H**

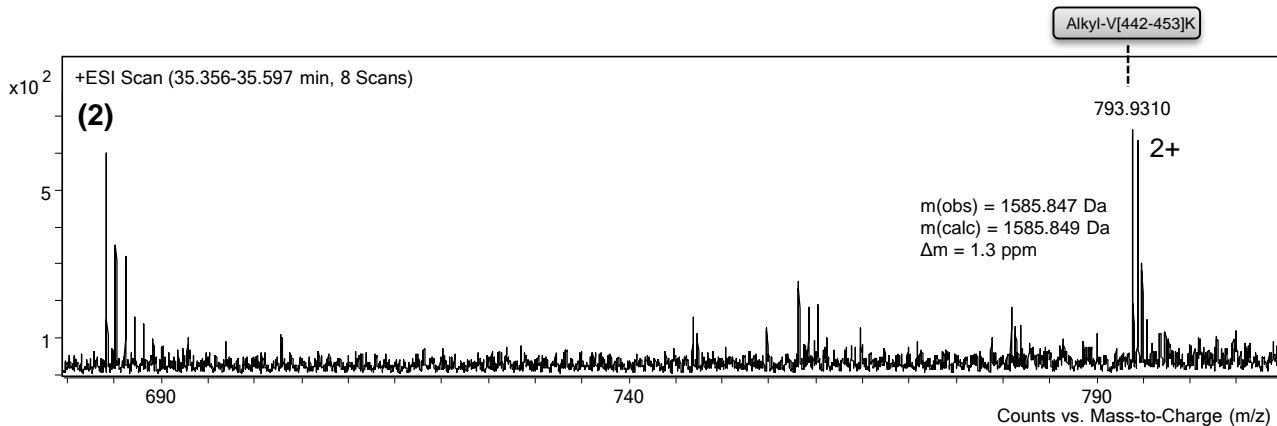

**Figure S8. Alkylation analysis of wild-type TEAS with substrate analogues and with (*E,E*)-FPP at increased reaction temperatures. (G, continued)** LC-MS analysis of nonalkylated and alkylated V[442-453]K and I[515-532]K of wild-type TEAS after reaction with (*E,E*)-FPP at 25°C, at 37°C and at 42°C. (H) MS spectrum of alkylated V[442-453]K of wild-type TEAS (2) after reaction with (*E,E*)-FPP at 42°C reaction temperature. Single asteriks mark BPC peaks of nonalkylated peptides, double asteriks mark BPC peaks of alkylated peptides.

**A**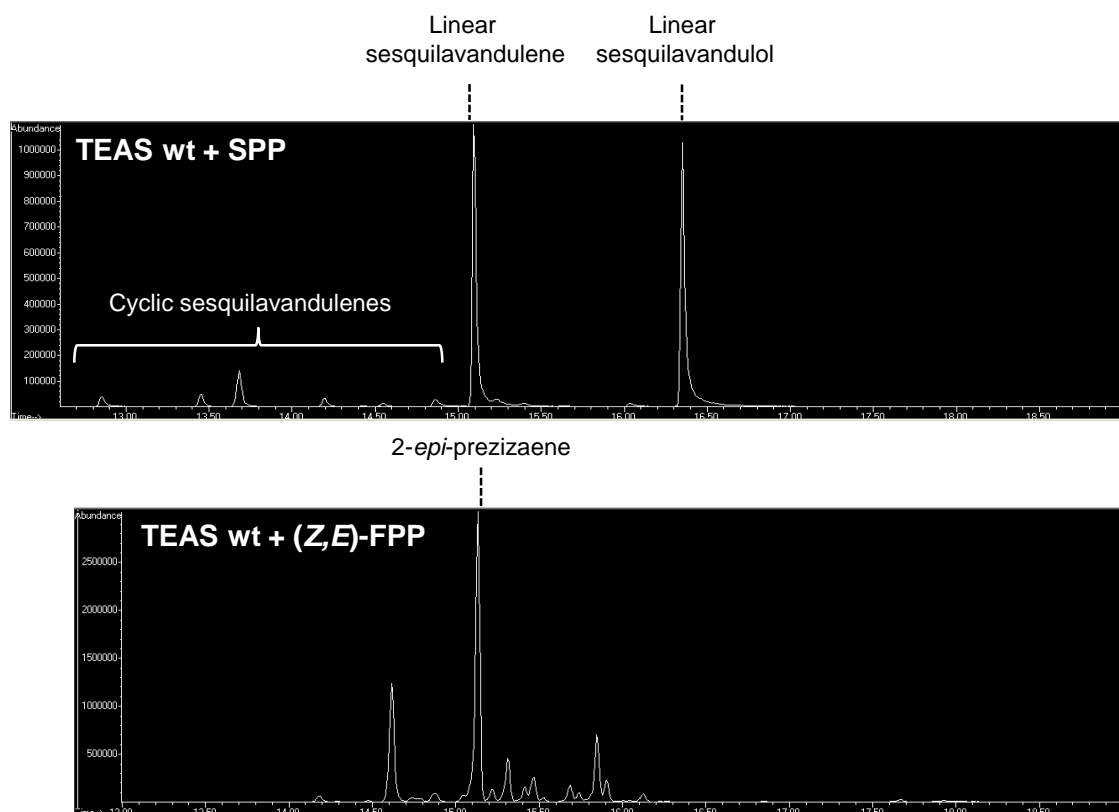**B**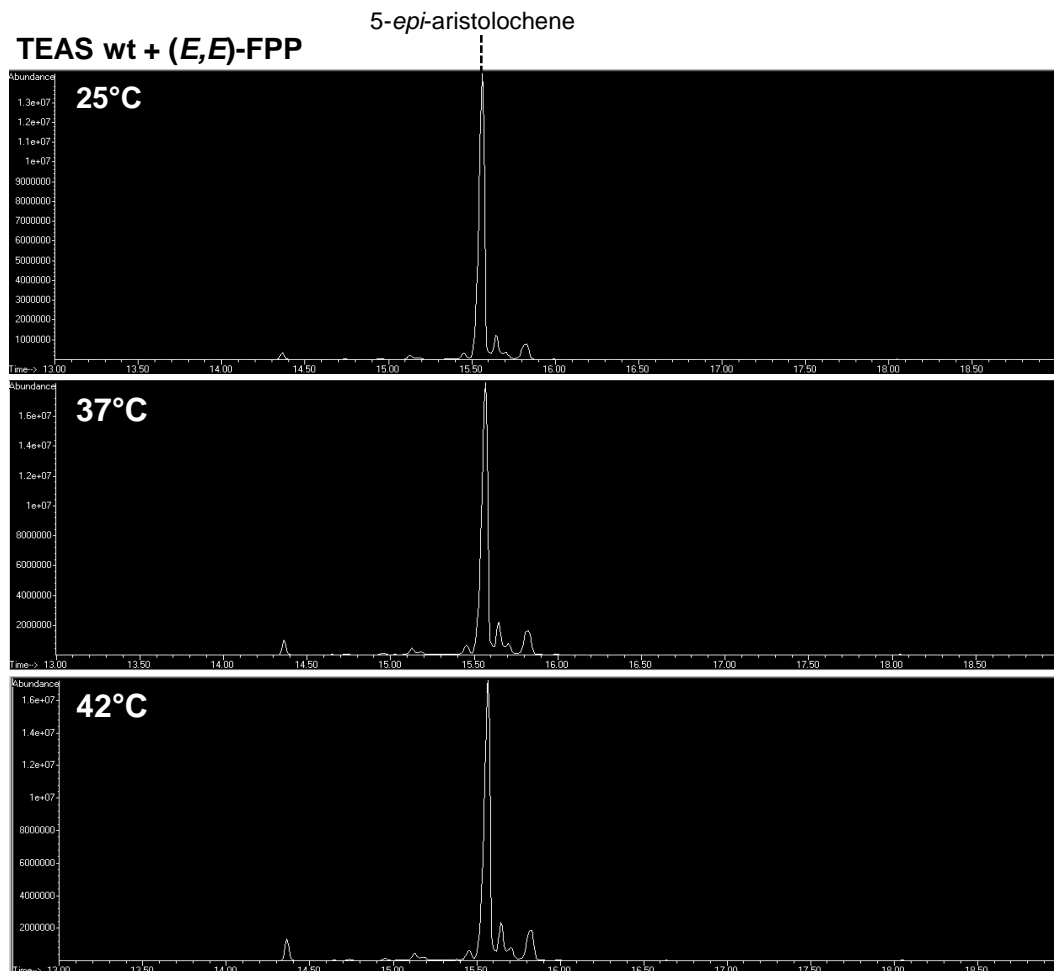

**Figure S9. GC-MS analysis of wild-type TEAS activity depending on substrate or reaction temperature. (A)** Wild-type TEAS product profile after reaction with substrate analogues sesquilavandulyl diphosphate (SPP) and  $(Z,E)$ -FPP for 12 h at 25°C. **(B)** Wild-type TEAS product profile after reaction with  $(E,E)$ -FPP for 12 h at 25°C, 37°C and 42°C.



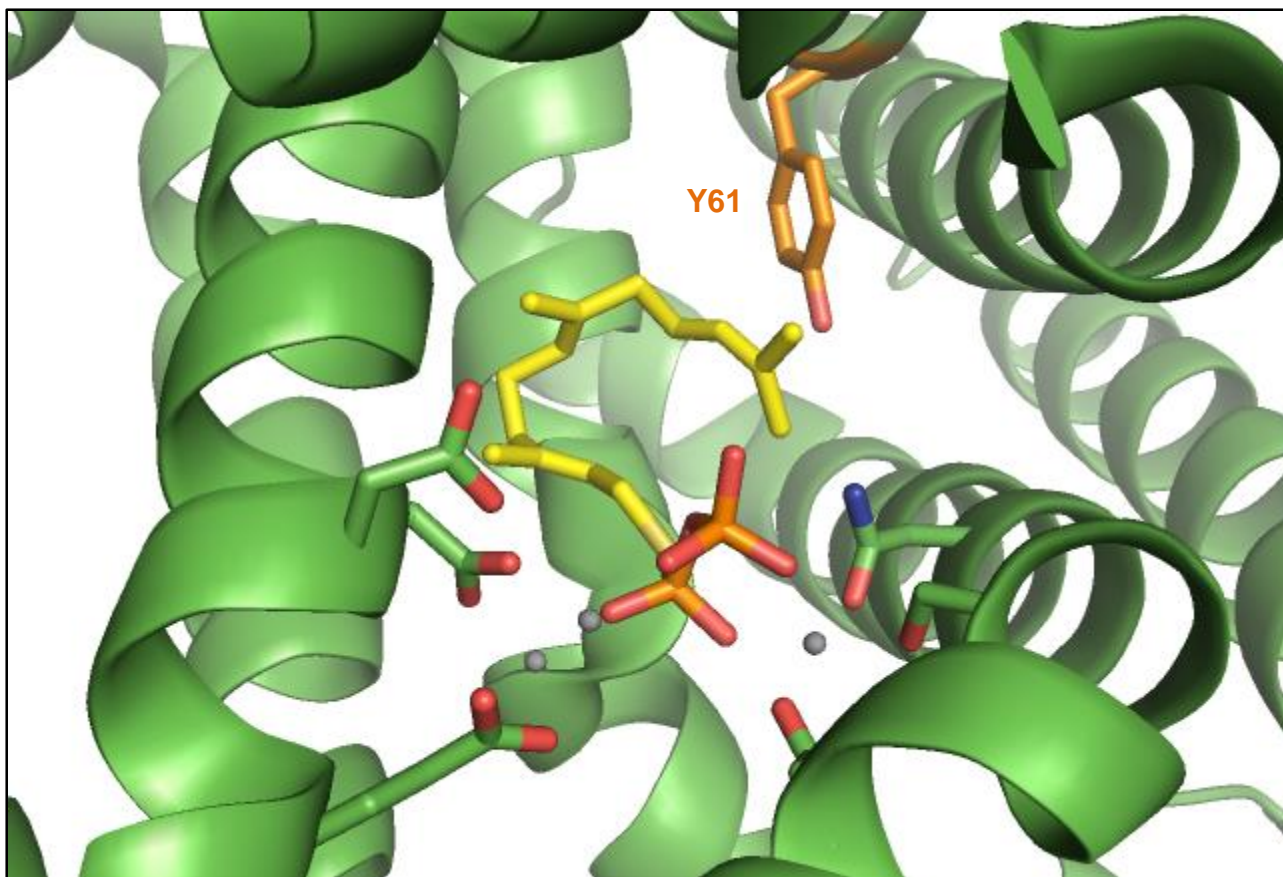

**Figure S11.** Active site model of *Aspergillus terreus* aristolochene synthase (ATAS, PDB: 4KUX) with substrate mimic farnesyl thiolodiphosphate (yellow). The residue Y61 (orange) was mutated for alkylation analysis due to its similar active site position as tryptophan 273 in tobacco 5-*epi*-aristolochene synthase (Figure 1A).  $Mg^{2+}$  cofactors are shown as grey spheres.

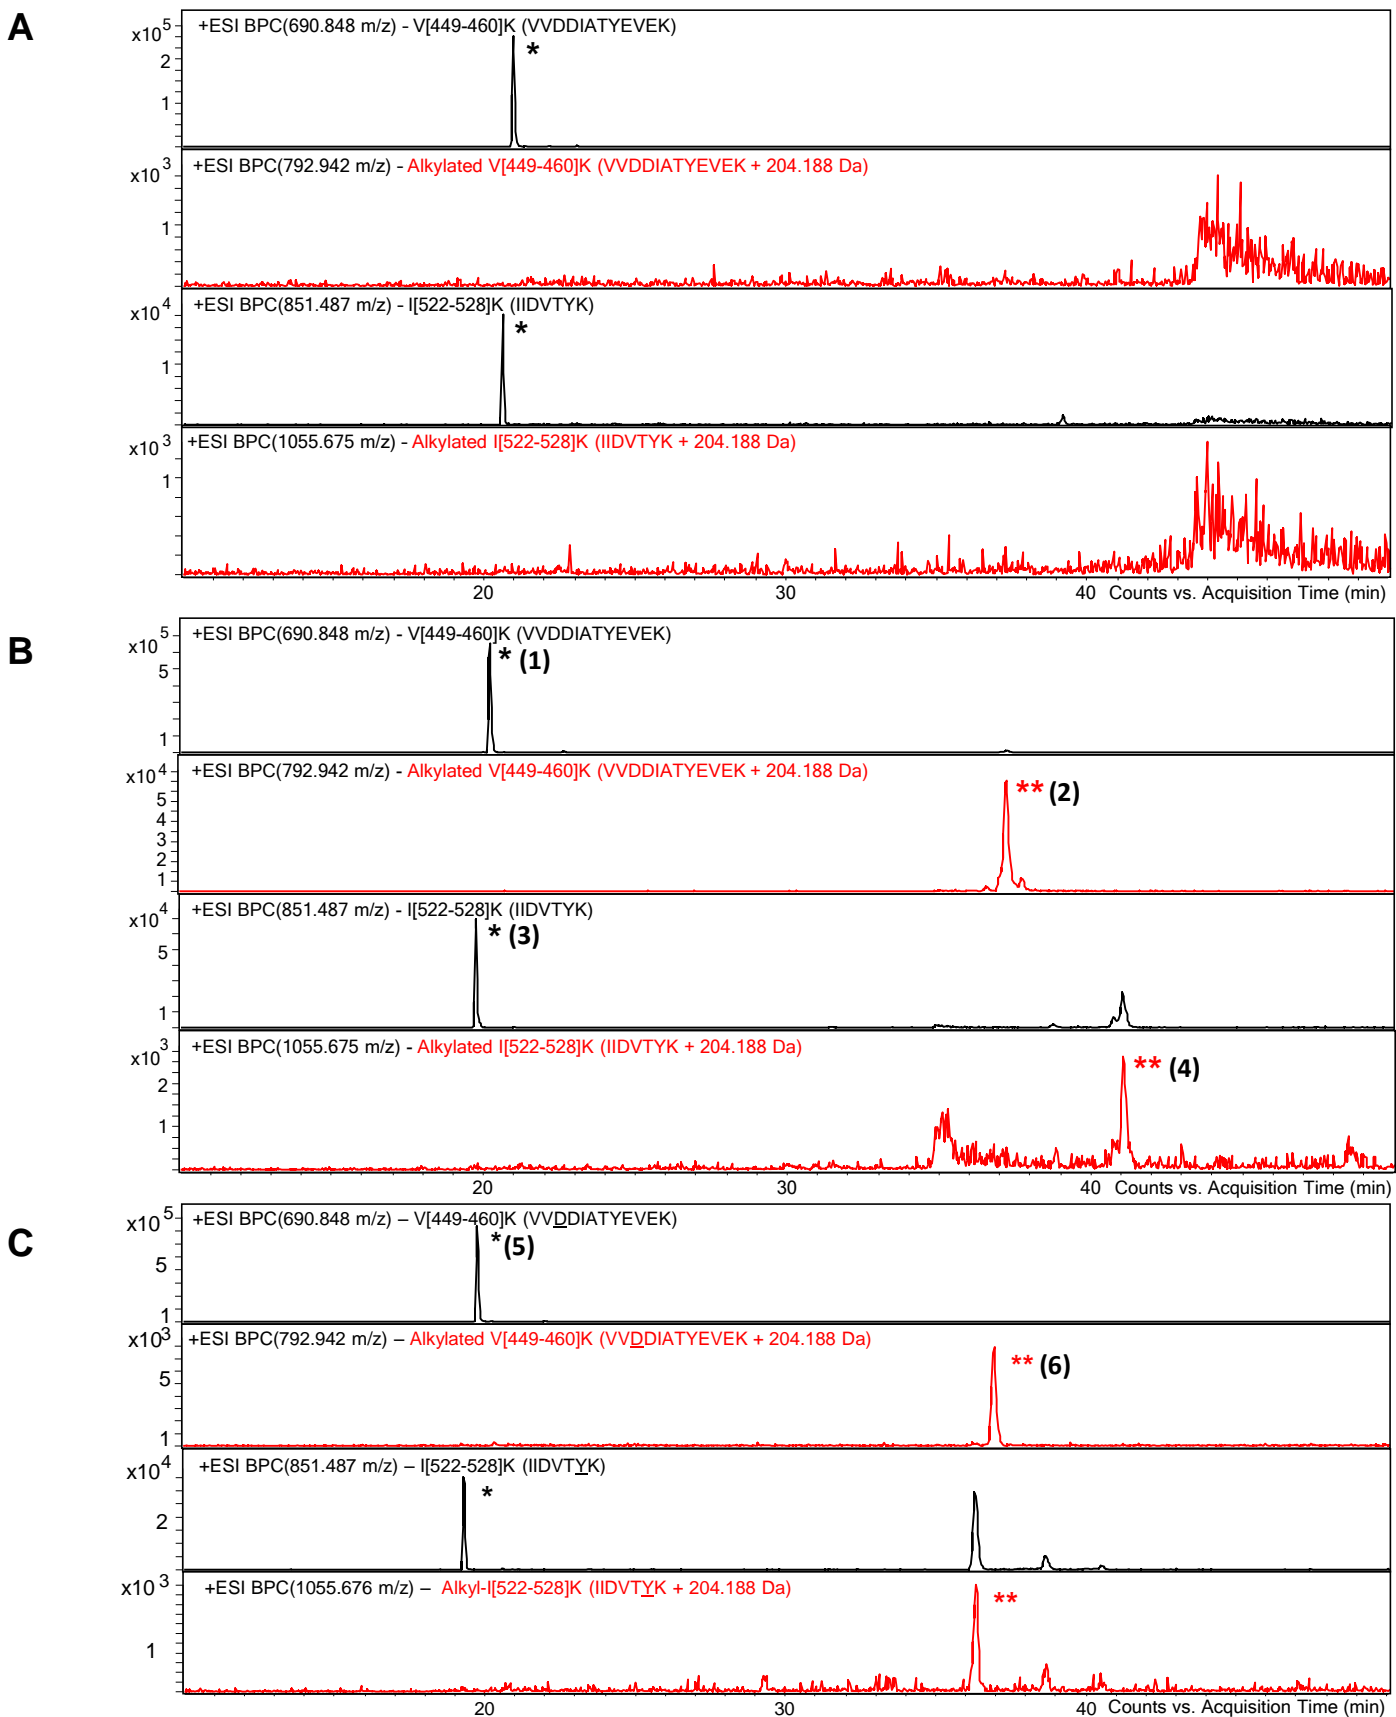

**Figure S12.** Alkylation analysis of dominant-product sesquiterpene synthases *Hyoscyamus muticus* prenaspirodiene synthase (HPS), citrus valencene synthase (CVS) and *Aspergillus terreus* aristolochene synthase (ATAS). (A) LC-MS analysis of nonalkylated and alkylated V[449-460]K and I[522-528]K of wild-type HPS after reaction with (*E,E*)-FPP. (B) LC-MS analysis of nonalkylated and alkylated V[449-460]K and I[522-528]K of wild-type HPS after reaction with SPP. Single asteriks mark BPC peaks of nonalkylated peptides, double asteriks mark BPC peaks of alkylated peptides. (C) LC-MS analysis of nonalkylated and alkylated V[449-460]K and I[522-528]K of HPS W280E after reaction with (*E,E*)-FPP.

D

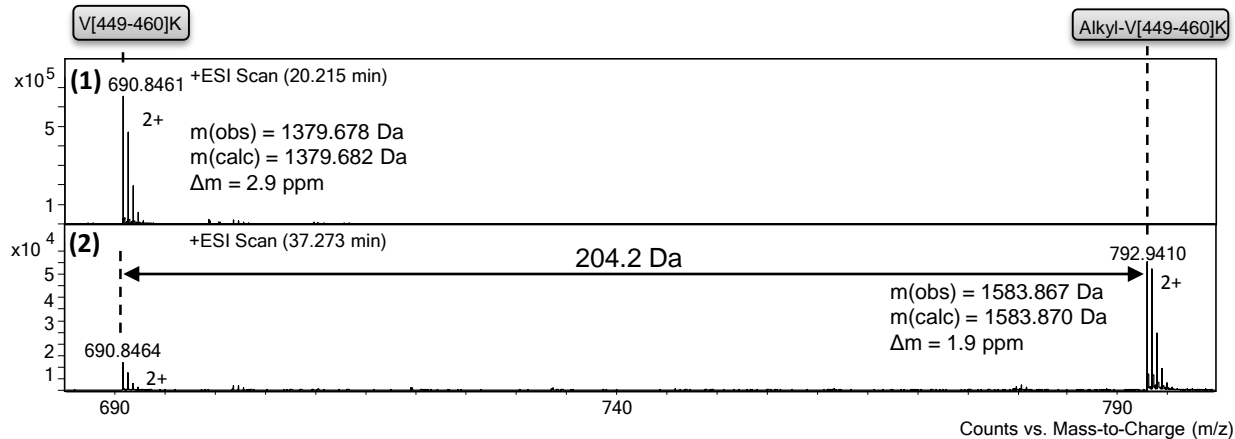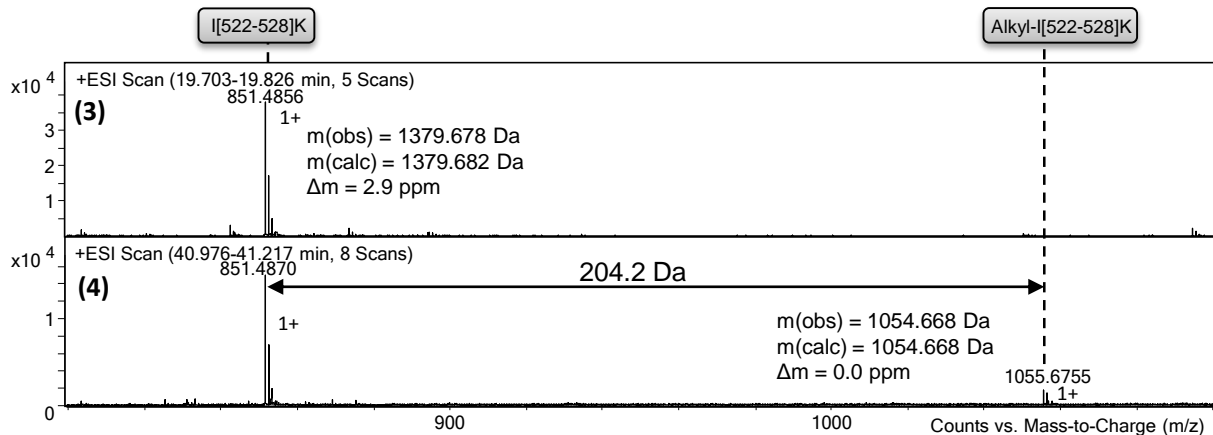

E

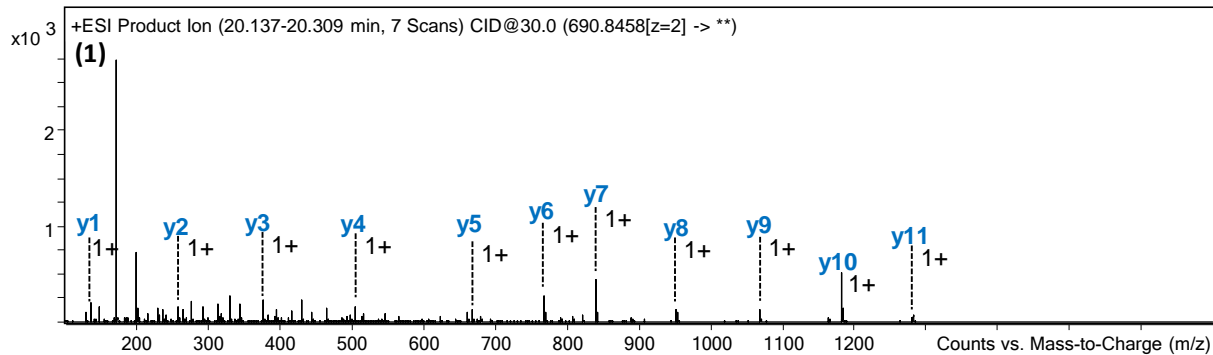

| Fragment | m(obs) [Da] | m(calc) [Da] | $\Delta m$ [Da] | $\Delta m$ [ppm] | Fragment | m(obs) [Da] | m(calc) [Da] | $\Delta m$ [Da] | $\Delta m$ [ppm] |
|----------|-------------|--------------|-----------------|------------------|----------|-------------|--------------|-----------------|------------------|
| y11      | 1281.618    | 1281.622     | -0.004          | 3.1              | y5       | 667.327     | 667.330      | -0.003          | 4.5              |
| y10      | 1182.547    | 1182.533     | 0.014           | 11.8             | y4       | 504.263     | 504.267      | -0.004          | 7.9              |
| y9       | 1067.515    | 1067.526     | -0.011          | 10.3             | y3       | 375.222     | 375.224      | -0.002          | 5.3              |
| y8       | 952.493     | 952.499      | -0.006          | 6.3              | y2       | 276.155     | 276.156      | -0.001          | 3.6              |
| y7       | 839.412     | 839.415      | -0.003          | 3.6              | y1       | 147.111     | 147.113      | -0.002          | 13.6             |
| y6       | 768.371     | 768.378      | -0.007          | 9.1              |          |             |              |                 |                  |

**Figure S12.** Alkylation analysis of dominant-product sesquiterpene synthases *Hyoscyamus muticus* premnaspirodiene synthase (HPS), citrus valencene synthase (CVS) and *Aspergillus terreus* aristolochene synthase (ATAS). (D) MS analysis of nonalkylated (1) and alkylated (2) V[449-460]K and nonalkylated (3) and alkylated (4) I[522-528]K of wild-type HPS after reaction with SPP. (E) MS/MS analysis of nonalkylated V[449-460]K (1) of wild-type HPS after reaction with SPP.

F

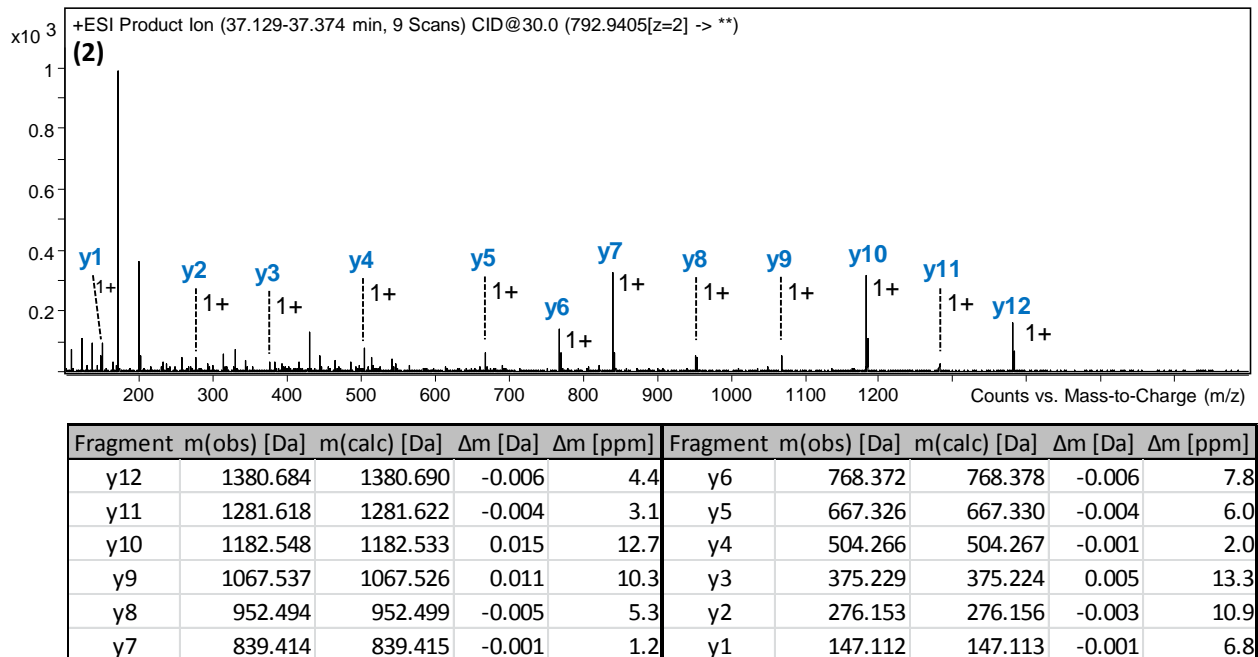

G

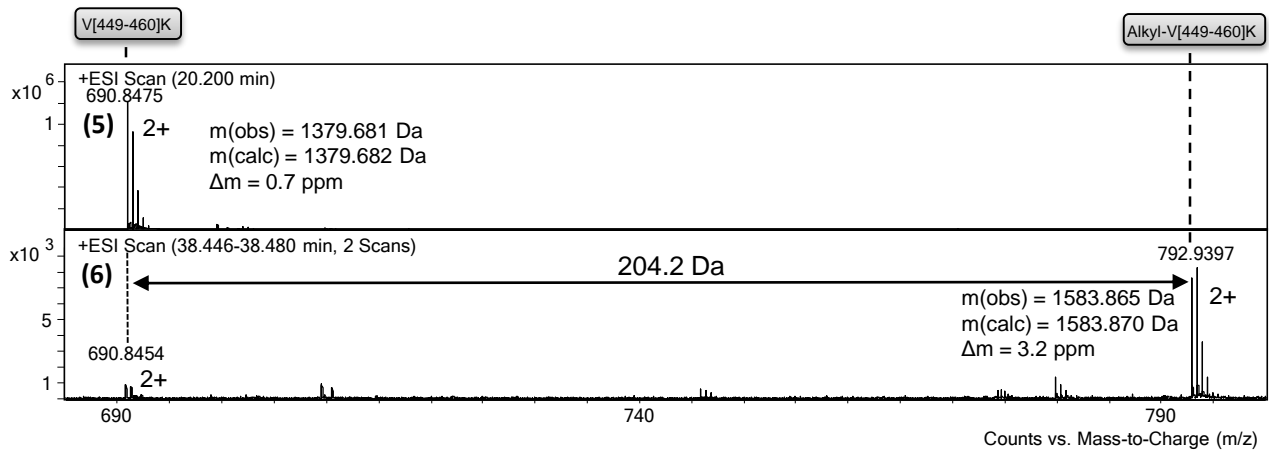

**Figure S12. Alkylation analysis of dominant-product sesquiterpene synthases *Hyoscyamus muticus* premnaspirodiene synthase (HPS), citrus valencene synthase (CVS) and *Aspergillus terreus* aristolochene synthase (ATAS).** (F) MS/MS analysis of alkylated V[449-460]K (2) of wild-type HPS after reaction with SPP. (G) MS analysis of nonalkylated (5) and alkylated (6) V[449-460]K and nonalkylated and alkylated I[522-528]K (see Figure S6) of HPS W280E after reaction with (*E,E*)-FPP.

**H**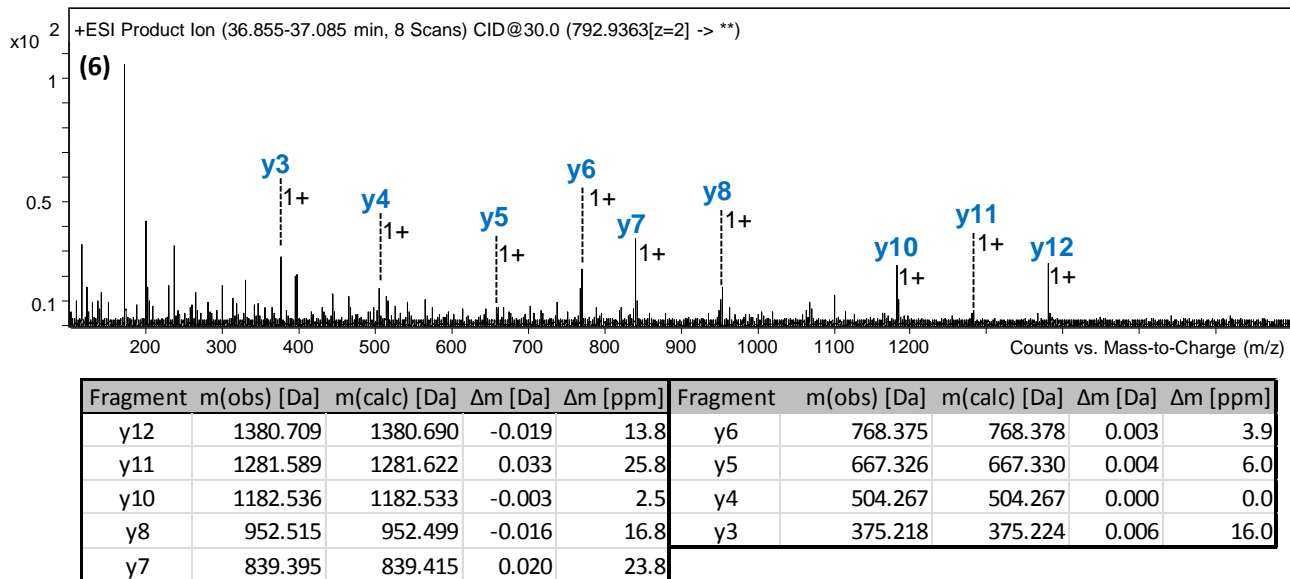**I**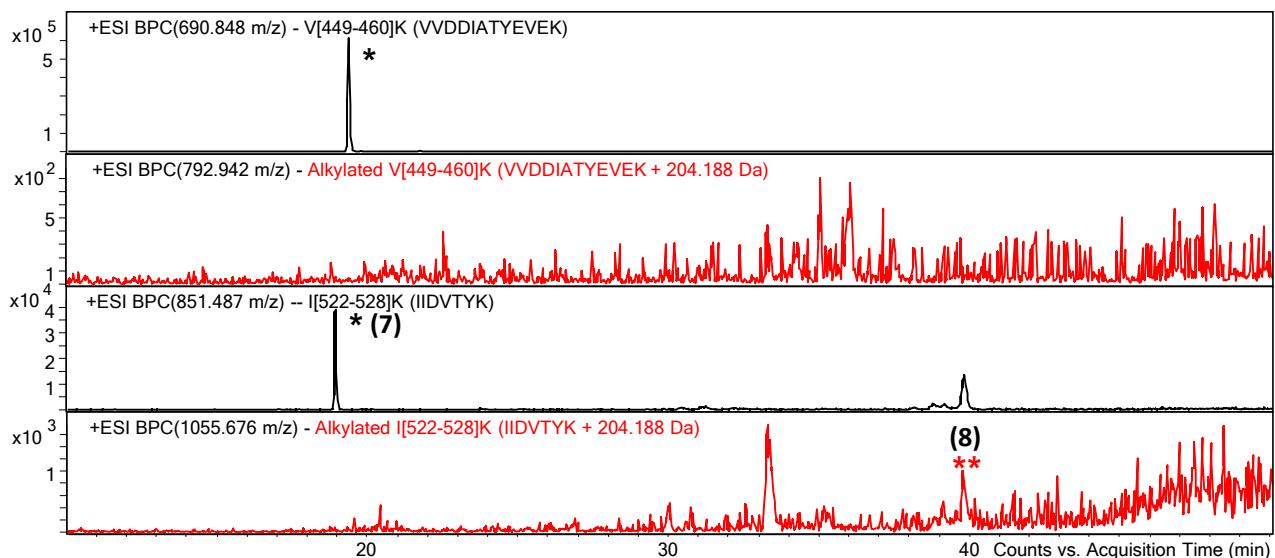**J**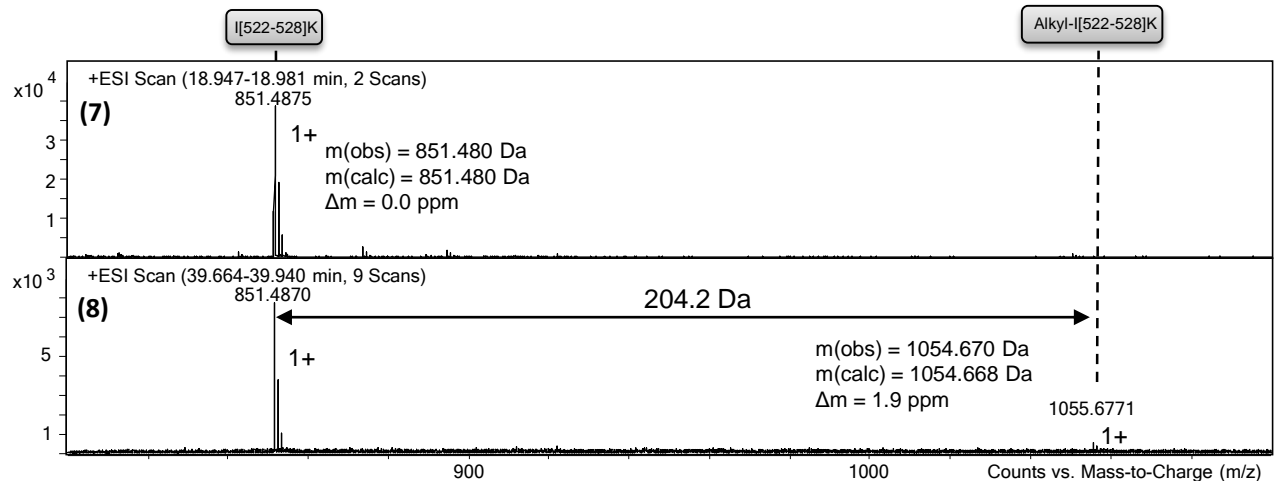

**Figure S12. Alkylation analysis of dominant-product sesquiterpene synthases *Hyoscyamus muticus* premnaspirodiene synthase (HPS), citrus valencene synthase (CVS) and *Aspergillus terreus* aristolochene synthase (ATAS). (H) MS/MS analysis of alkylated V[449-460]K (6) of HPS W280E after reaction with FPP. (I) LC-MS analysis of nonalkylated and alkylated V[449-460]K and I[522-528]K of wild-type HPS after reaction with (*Z,E*)-FPP. (J) MS analysis of nonalkylated (7) and alkylated (8) V[449-460]K of wild-type HPS after reaction with (*Z,E*)-FPP.**



**K**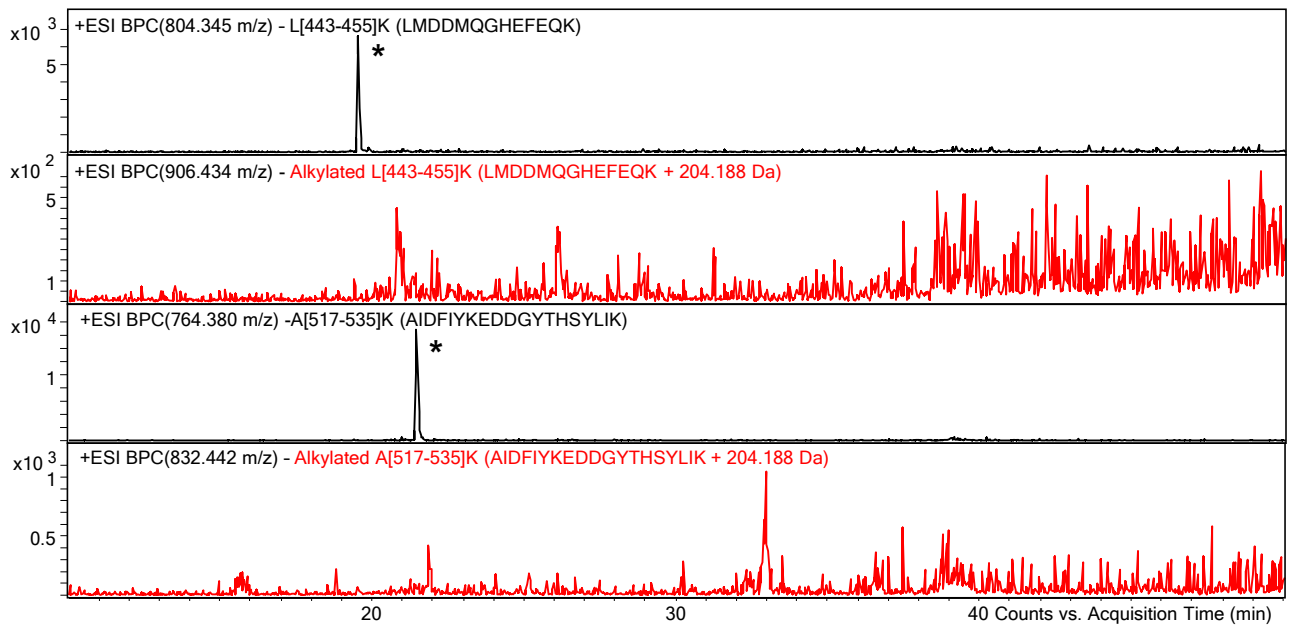**L**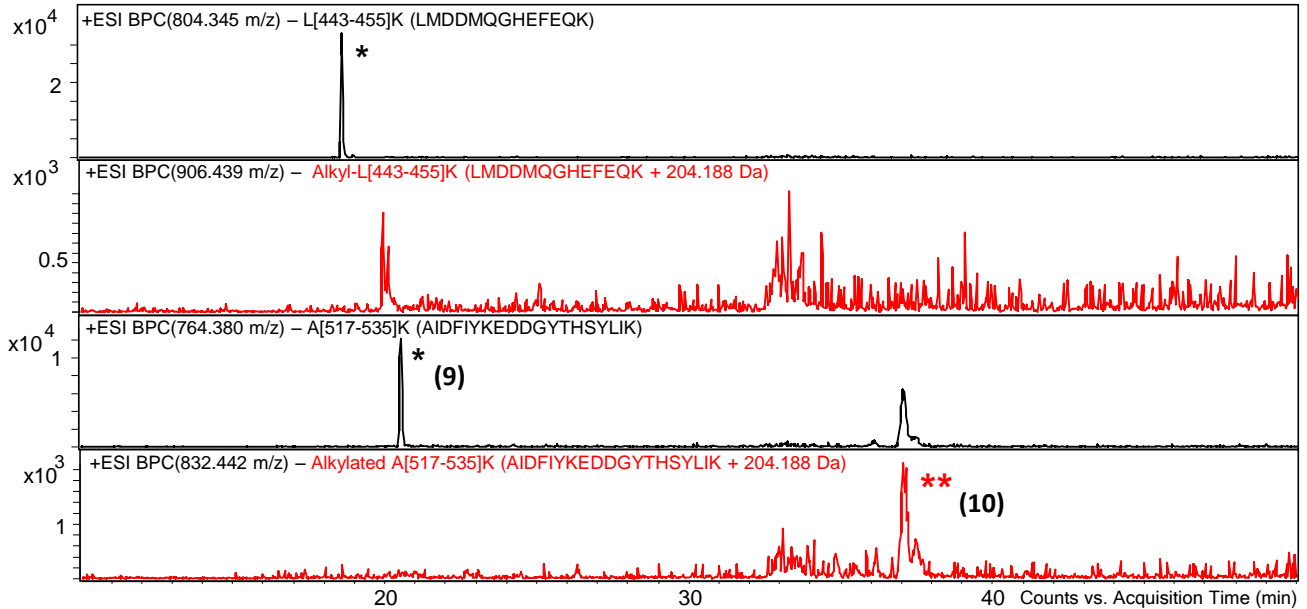**M**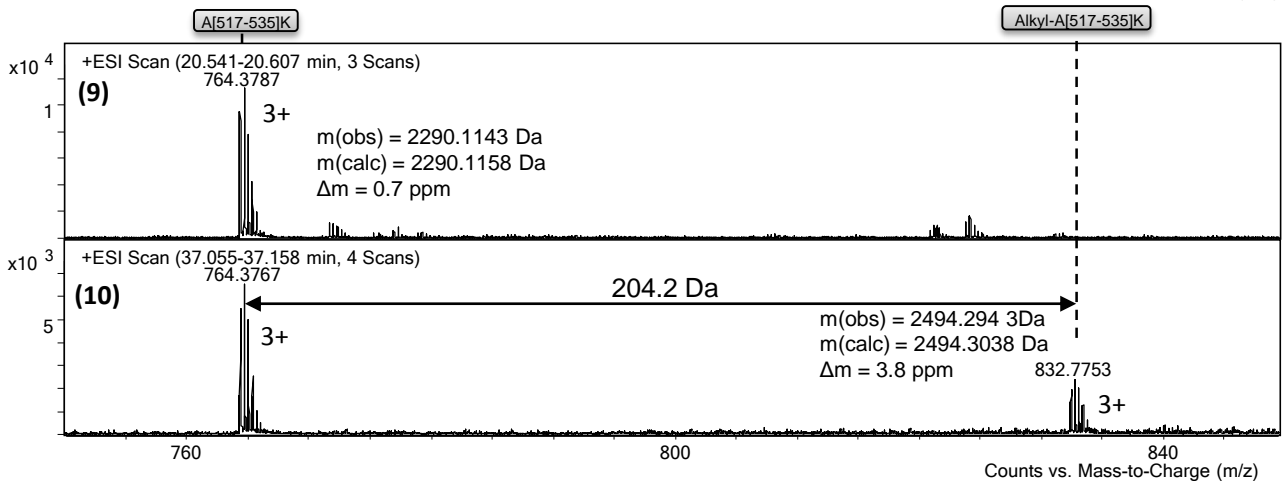

**Figure S12.** Alkylation analysis of dominant-product sesquiterpene synthases *Hyoscyamus muticus* premnaspirodiene synthase (HPS), citrus valencene synthase (CVS) and *Aspergillus terreus* aristolochene synthase (ATAS). (K) LC-MS analysis of nonalkylated and alkylated L[443-455]K and A[517-535]K of wild-type CVS after reaction with (*E,E*)-FPP. (L) LC-MS analysis of nonalkylated and alkylated L[443-455]K and A[517-535]K of CVS W273E after reaction with (*E,E*)-FPP. Single asterisks mark BPC peaks of nonalkylated peptides, double asterisks mark BPC peaks of alkylated peptides. (M) MS analysis of nonalkylated (9) and alkylated (10) A[517-535]K of CVS W273E after reaction with (*E,E*)-FPP.

N

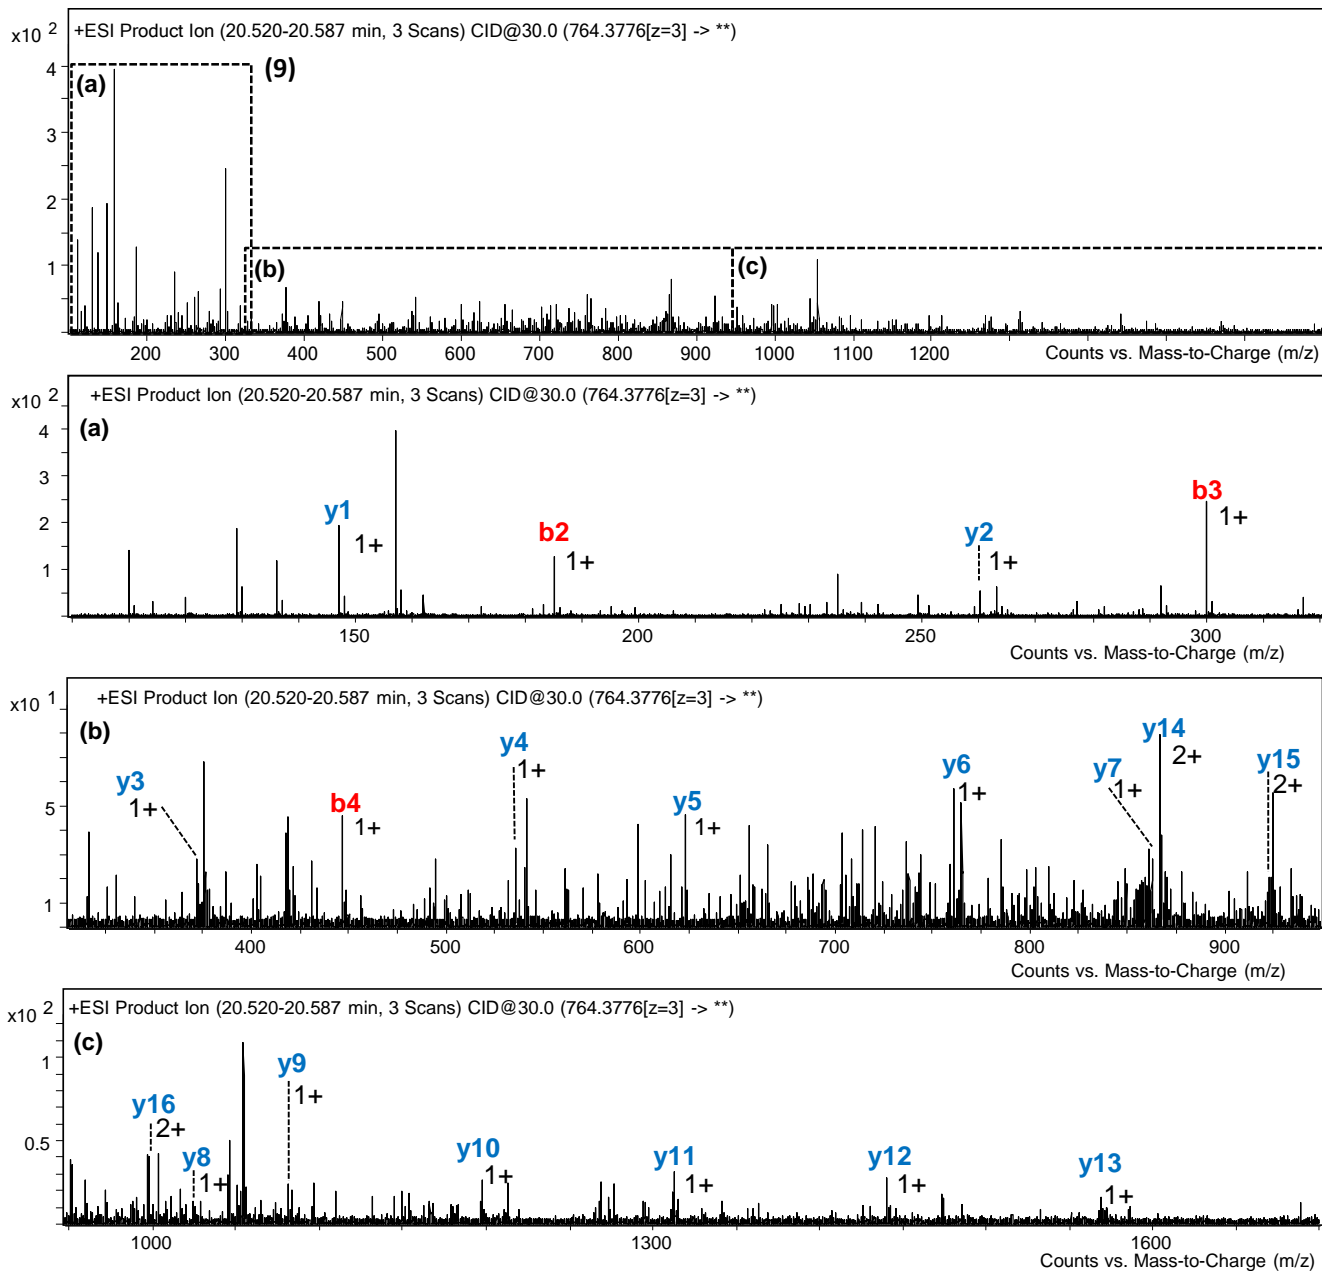

Figure S12. Alkylation analysis of dominant-product sesquiterpene synthases *Hyoscyamus muticus* premnaspirodiene synthase (HPS), citrus valencene synthase (CVS) and *Aspergillus terreus* aristolochene synthase (ATAS). (N) MS/MS analysis of nonalkylated (9) A[517-535]K of CVS W273E after reaction with (E,E)-FPP.

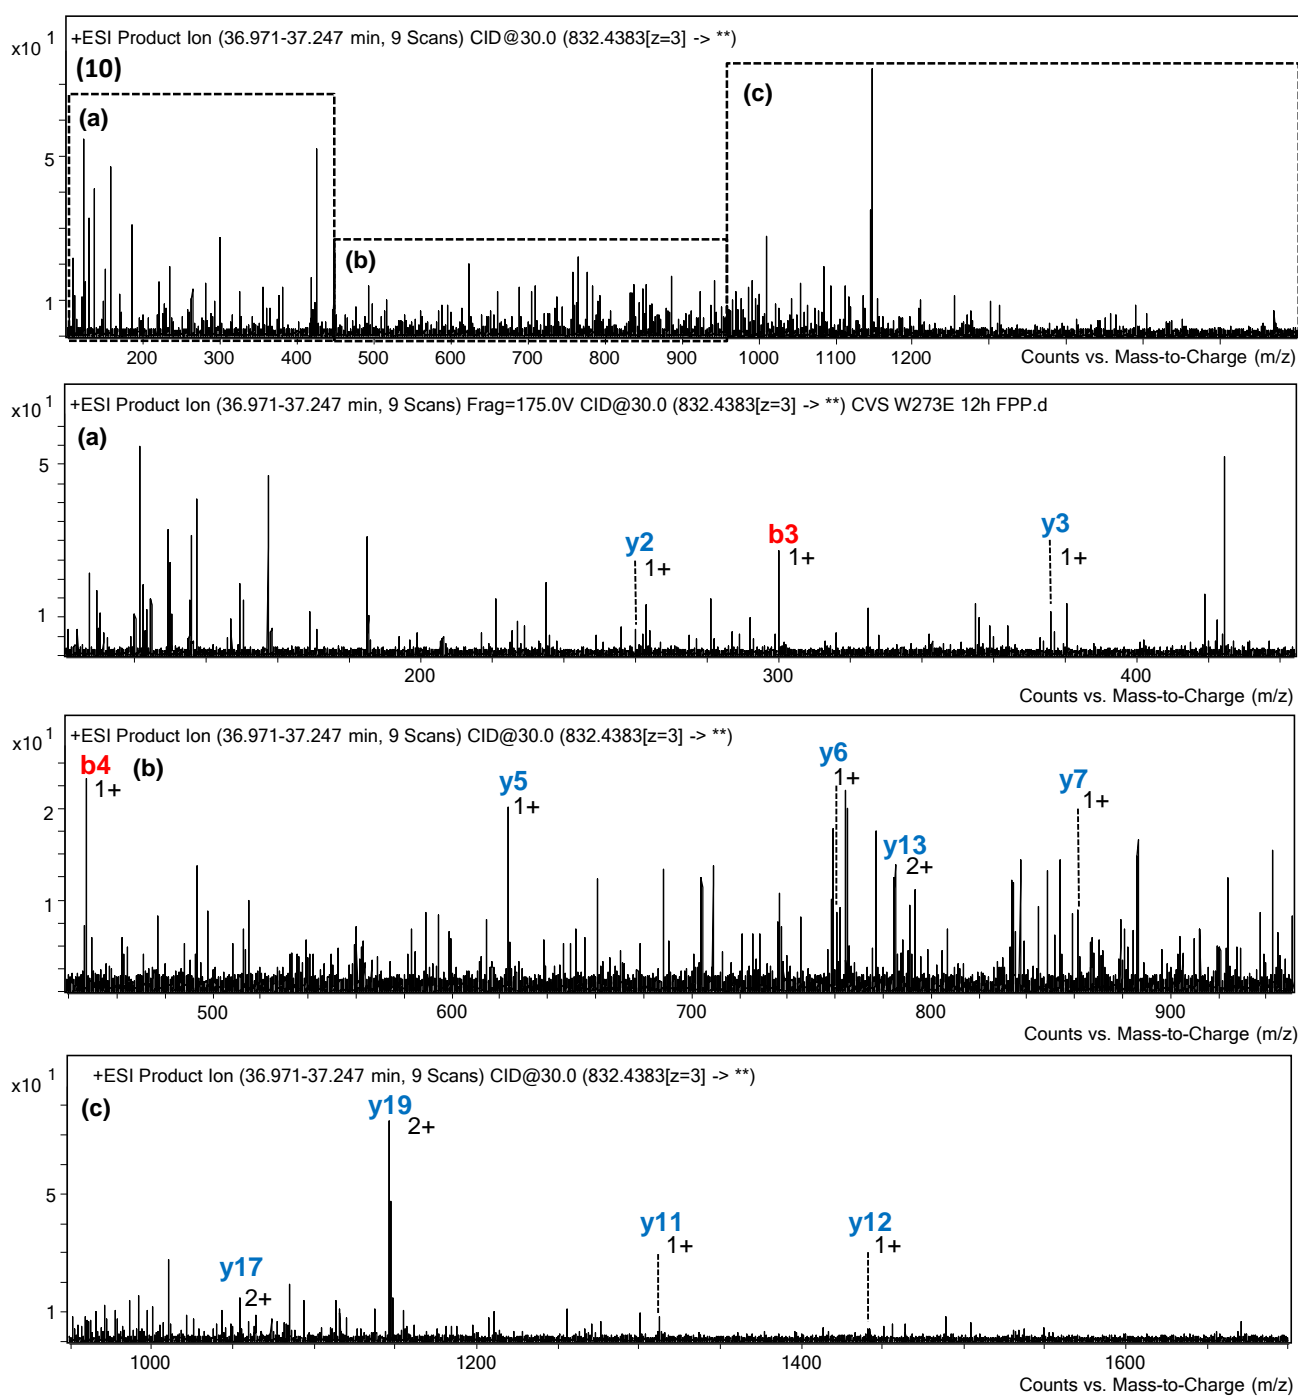

| Fragment | m(obs) [Da] | m(calc) [Da] | $\Delta m$ [Da] | $\Delta m$ [ppm] | Fragment | m(obs) [Da] | m(calc) [Da] | $\Delta m$ [Da] | $\Delta m$ [ppm] |
|----------|-------------|--------------|-----------------|------------------|----------|-------------|--------------|-----------------|------------------|
| y19      | 2291.089    | 2291.124     | 0.035           | 15.3             | y6       | 760.431     | 760.436      | 0.005           | 6.6              |
| y17      | 2107.019    | 2107.003     | -0.016          | 7.6              | y5       | 623.366     | 623.377      | 0.011           | 17.6             |
| y13      | 1568.778    | 1568.760     | -0.018          | 11.5             | b4       | 447.223     | 447.224      | 0.001           | 2.2              |
| y12      | 1440.674    | 1440.665     | -0.009          | 6.3              | y3       | 373.290     | 373.282      | -0.008          | 21.4             |
| y11      | 1311.648    | 1311.622     | -0.026          | 19.8             | b3       | 300.150     | 300.156      | 0.006           | 20               |
| y7       | 861.465     | 861.484      | 0.019           | 22.1             | y2       | 260.195     | 260.198      | 0.003           | 11.5             |

**Figure S12.** Alkylation analysis of dominant-product sesquiterpene synthases *Hyoscyamus muticus* premnaspirodiene synthase (HPS), citrus valencene synthase (CVS) and *Aspergillus terreus* aristolochene synthase (ATAS). (O) MS/MS analysis of alkylated A[517-535]K (10) of CVS W273E after reaction with (*E,E*)-FPP.

**P**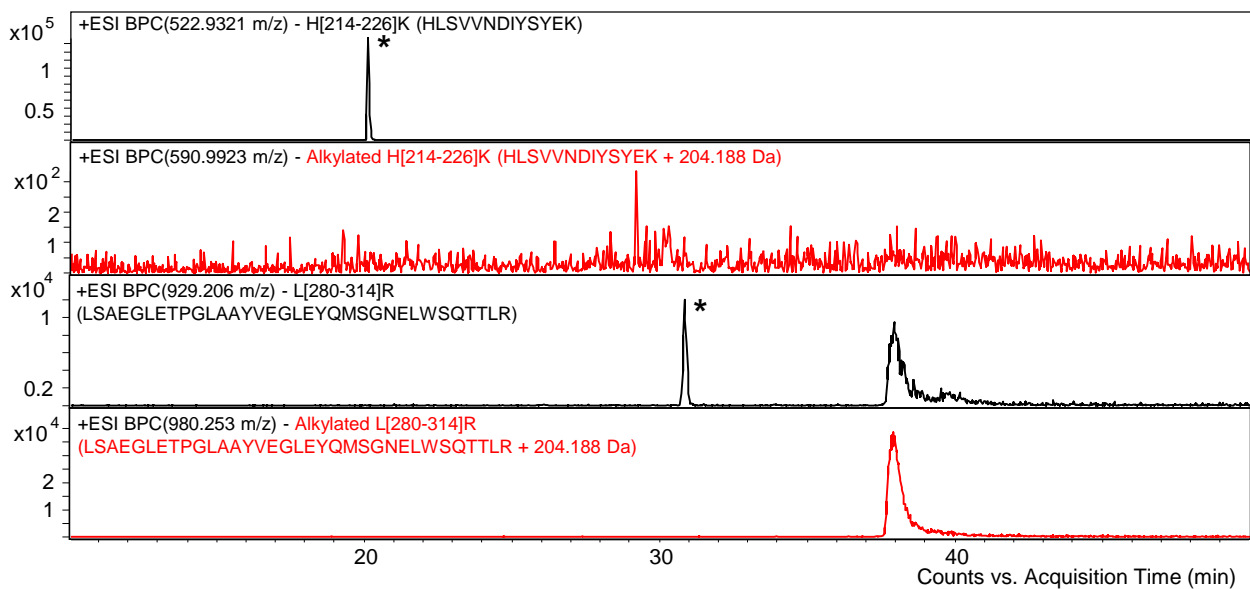**Q**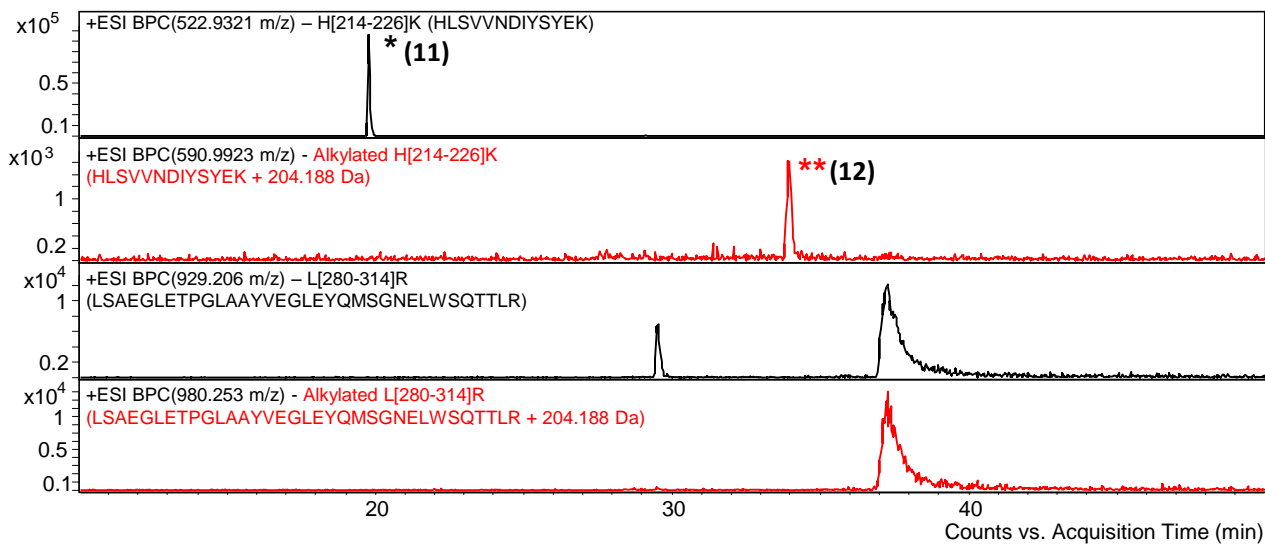**R**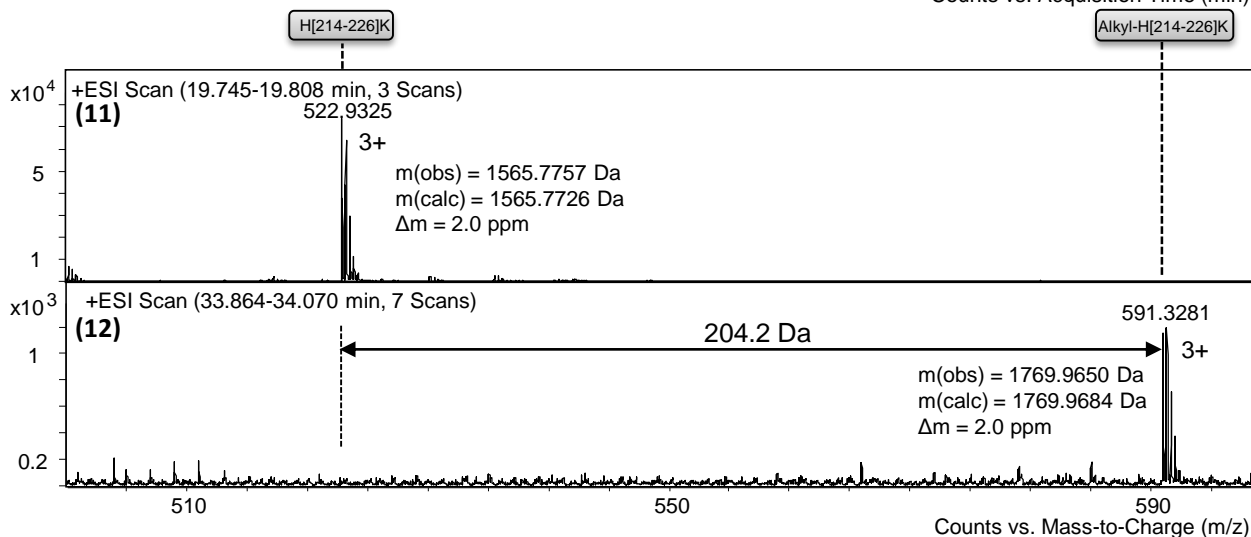

**Figure S12. Alkylation analysis of dominant-product sesquiterpene synthases *Hyoscyamus muticus* prenaspirodiene synthase (HPS), citrus valencene synthase (CVS) and *Aspergillus terreus* aristolochene synthase (ATAS). (P) LC-MS analysis of nonalkylated and alkylated tryptic peptides H[214-226]K and L[280-314]R of wild-type ATAS after reaction with (*E,E*)-FPP. (Q) LC-MS analysis of nonalkylated and alkylated tryptic peptides H[214-226]K and L[280-314]R of wild-type ATAS after reaction with (*E,E*)-FPP. Single asterisks mark BPC peaks of nonalkylated peptides, double asterisks mark BPC peaks of alkylated peptides. (R) MS analysis of nonalkylated (11) and alkylated (12) tryptic peptides H[214-226]K of ATAS Y61C after reaction with (*E,E*)-FPP.**

**S**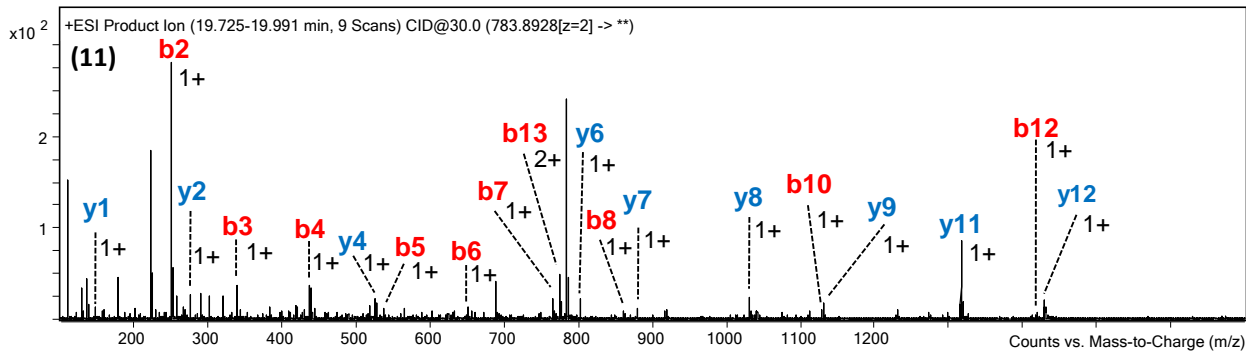

| Fragment | m(obs) [Da] | m(calc) [Da] | $\Delta$ m [Da] | $\Delta$ m [ppm] | Fragment | m(obs) [Da] | m(calc) [Da] | $\Delta$ m [Da] | $\Delta$ m [ppm] |
|----------|-------------|--------------|-----------------|------------------|----------|-------------|--------------|-----------------|------------------|
| b13      | 1548.750    | 1548.770     | 0.020           | 12.8             | y6       | 802.3944    | 802.39874    | 0.004           | 5.4              |
| y12      | 1429.710    | 1429.722     | 0.012           | 8.1              | b7       | 765.3857    | 765.38957    | 0.004           | 5.1              |
| b12      | 1420.662    | 1420.675     | 0.013           | 9.4              | b6       | 650.3566    | 650.36263    | 0.00603         | 9.3              |
| y11      | 1316.630    | 1316.637     | 0.008           | 5.7              | b5       | 536.3247    | 536.3197     | -0.005          | 9.3              |
| y9       | 1130.530    | 1130.53702   | 0.008           | 6.7              | y4       | 526.2505    | 526.25135    | 0.001           | 1.6              |
| b10      | 1128.568    | 1128.56899   | 0.00099         | 0.9              | b4       | 437.2513    | 437.25129    | 0.000           | 0                |
| y8       | 1031.456    | 1031.469     | 0.013           | 12.7             | b3       | 338.1787    | 338.18287    | 0.004           | 12.3             |
| y7       | 917.4259    | 917.426      | 0.000           | 0.2              | y2       | 276.1523    | 276.15599    | 0.004           | 13.4             |
| b8       | 878.4812    | 878.474      | -0.0076         | 8.6              | b2       | 251.1487    | 251.15085    | 0.002           | 8.6              |
|          |             |              |                 |                  | y1       | 147.1151    | 147.1134     | -0.0017         | 11.6             |

**T**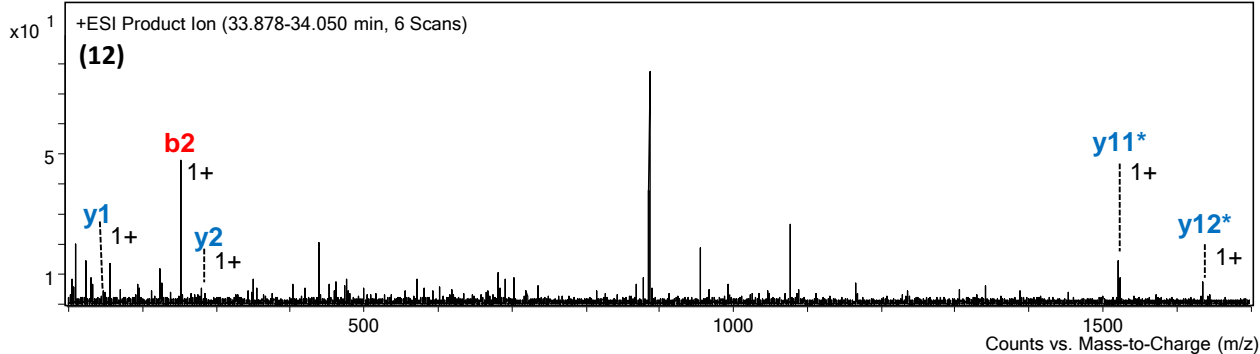

| Fragment | m(obs) [Da] | m(calc) [Da] | $\Delta$ m [Da] | $\Delta$ m [ppm] |
|----------|-------------|--------------|-----------------|------------------|
| y12*     | 1633.9395   | 1633.9095    | -0.030          | 18.3             |
| y11*     | 1520.8046   | 1520.8255    | 0.021           | 13.7             |
| y2       | 276.1531    | 276.1560     | 0.003           | 10.5             |
| b2       | 251.1491    | 251.1509     | 0.002           | 7.0              |
| y1       | 147.1144    | 147.1134     | -0.001          | 6.8              |

**Figure S12.** Alkylation analysis of dominant-product sesquiterpene synthases *Hyoscyamus muticus* premnaspirodiene synthase (HPS), citrus valencene synthase (CVS) and *Aspergillus terreus* aristolochene synthase (ATAS). (S) MS/MS analysis of nonalkylated tryptic peptide H[214-226]K (11) of ATAS Y61C after reaction with (*E,E*)-FPP. (T) MS/MS analysis of alkylated tryptic peptide H[214-226]K (12) of ATAS Y61C after reaction with (*E,E*)-FPP.

HPS  
wild-type

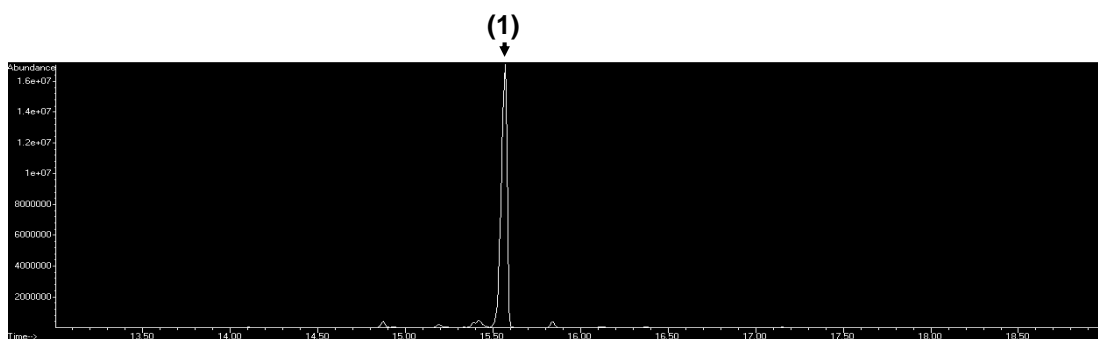

HPS  
W280E

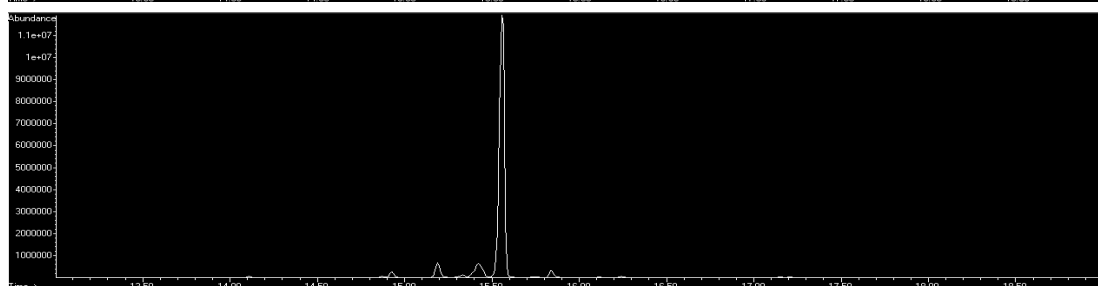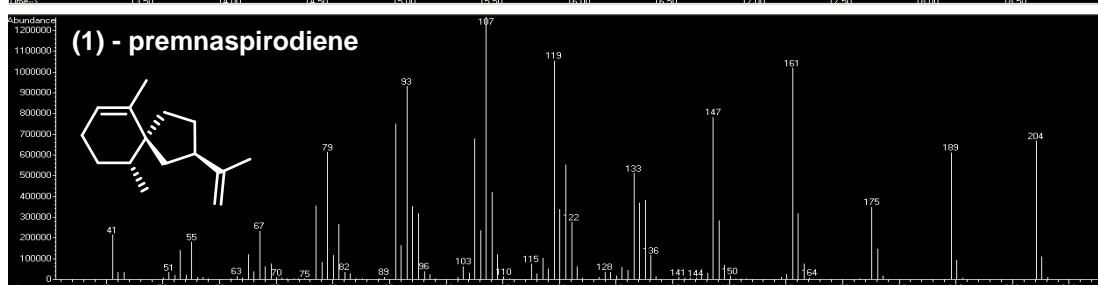

CVS  
wild-type

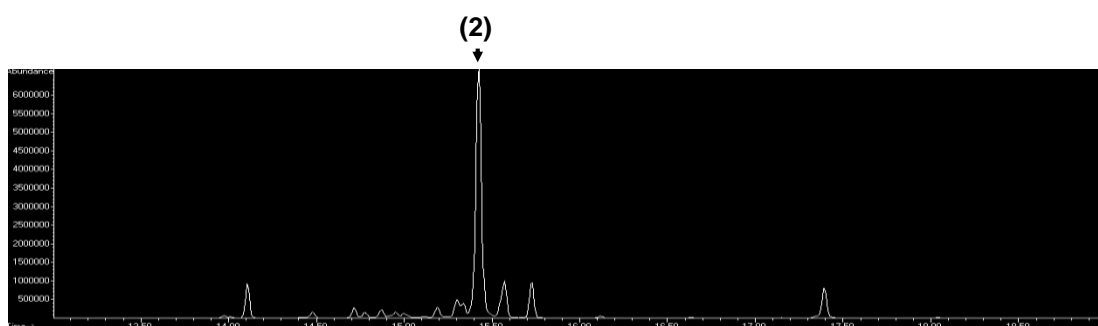

CVS  
W273E

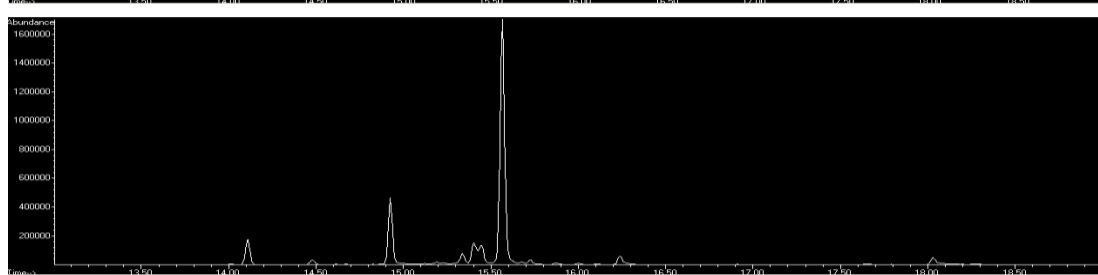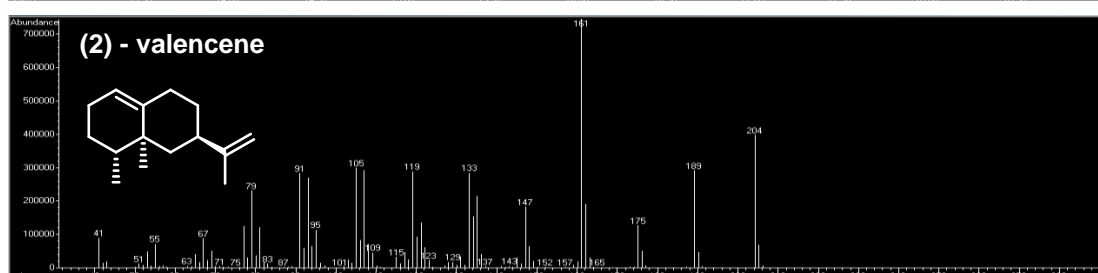

Figure S13. GC-MS analysis of product profiles of wild-type and active site mutants of sesquiterpene synthases after reaction with (*E,E*)-FPP. Total ion chromatograms of hexane extracts of corresponding enzyme reactions and GC-MS spectra of main products are shown.

ATAS  
wild-type

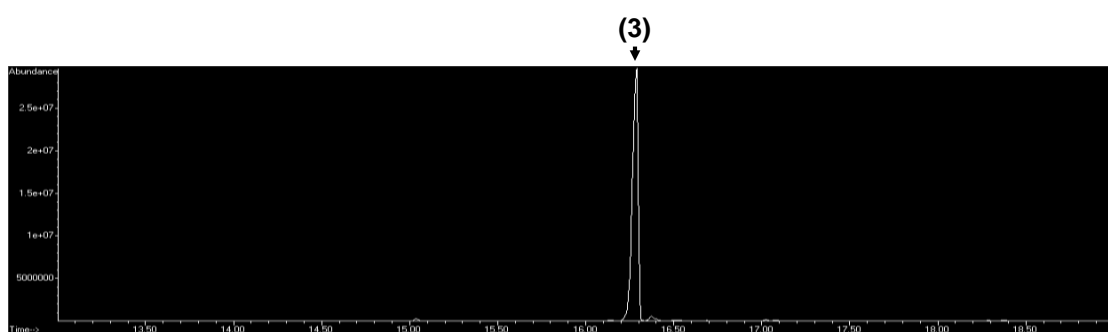

ATAS  
Y61C

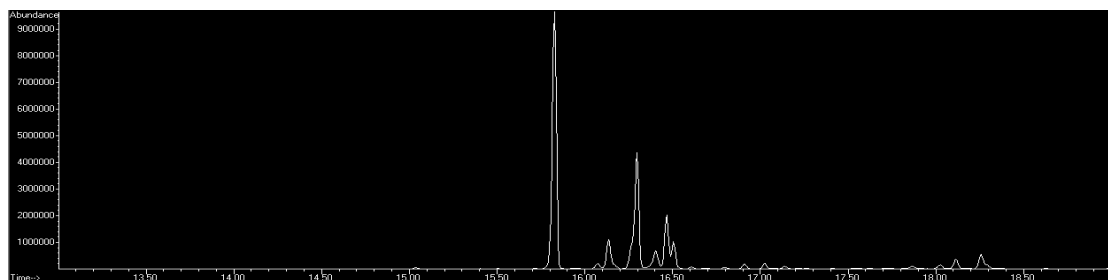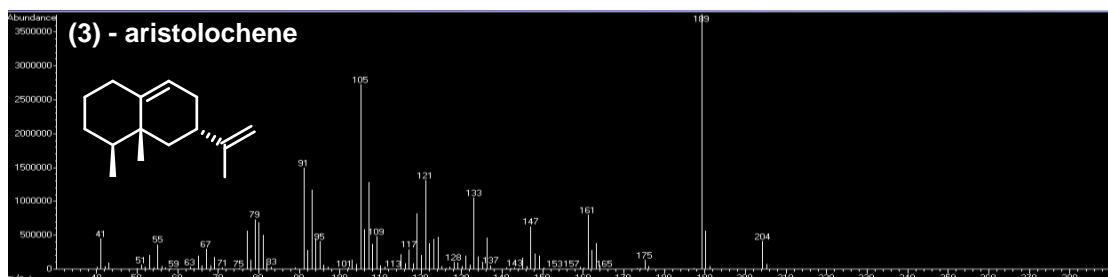

Sspissy  
wild-type

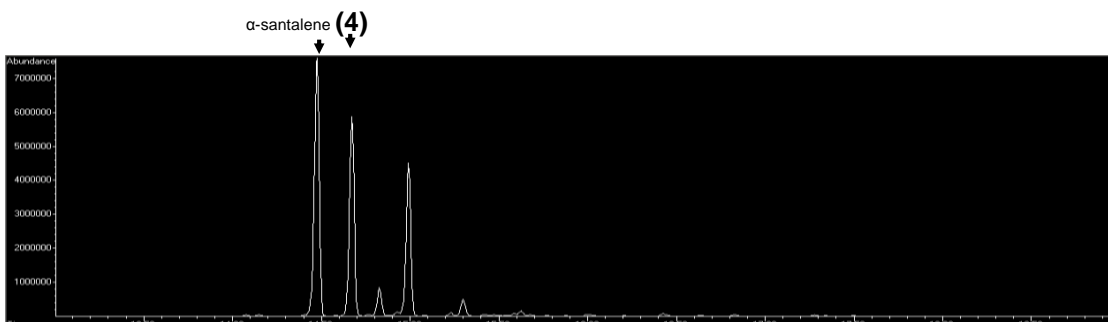

Sspissy  
W293E

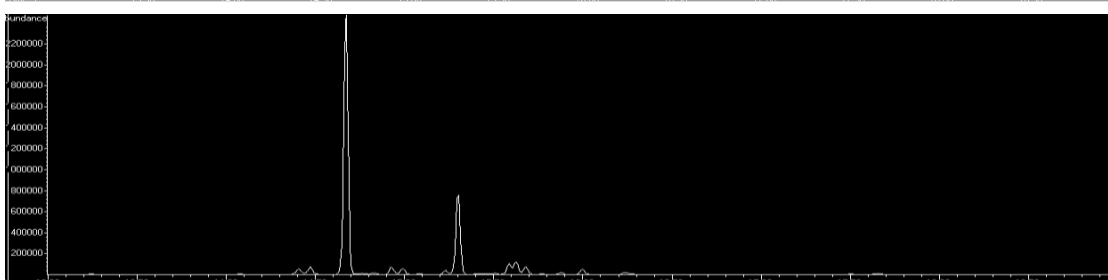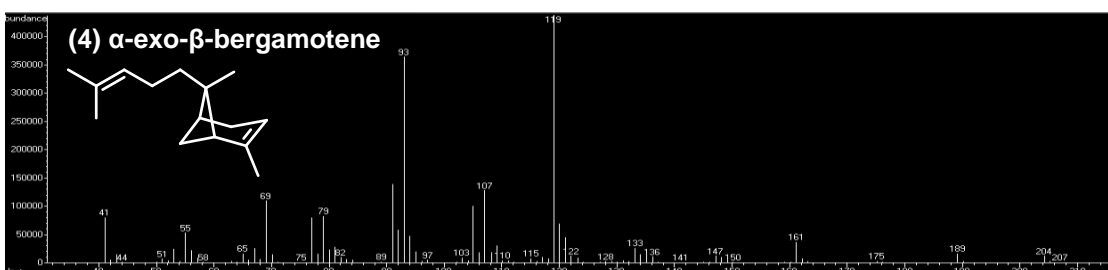

Figure S13. GC-MS analysis of product profiles of wild-type and active site mutants of sesquiterpene synthases after reaction with (*E,E*)-FPP. Total ion chromatograms of hexane extracts of corresponding enzyme reactions and GC-MS spectra of main products are shown.

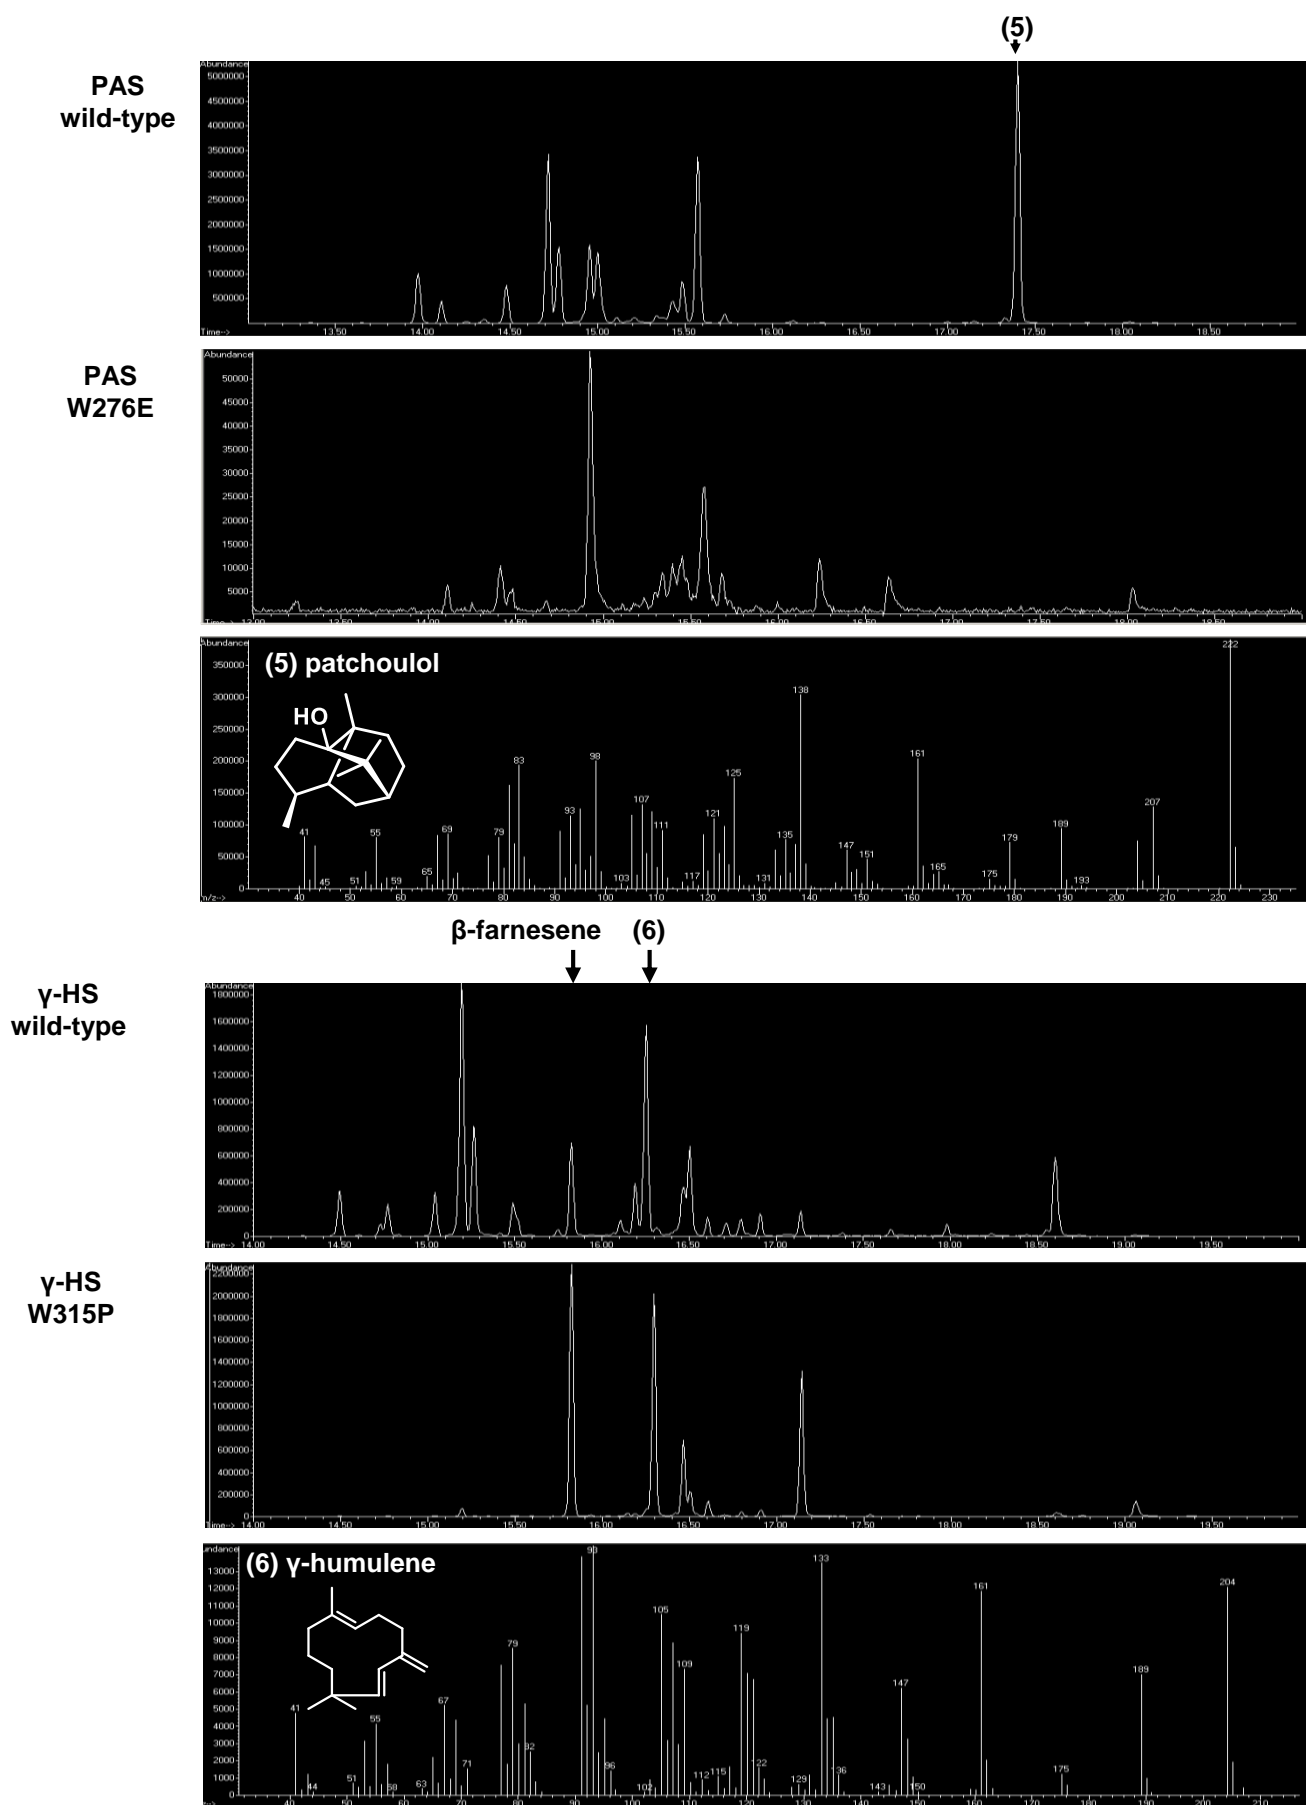

**Figure S13.** GC-MS analysis of product profiles of wild-type and active site mutants of sesquiterpene synthases after reaction with (*E,E*)-FPP. Total ion chromatograms of hexane extracts of corresponding enzyme reactions and GC-MS spectra of main products are shown.



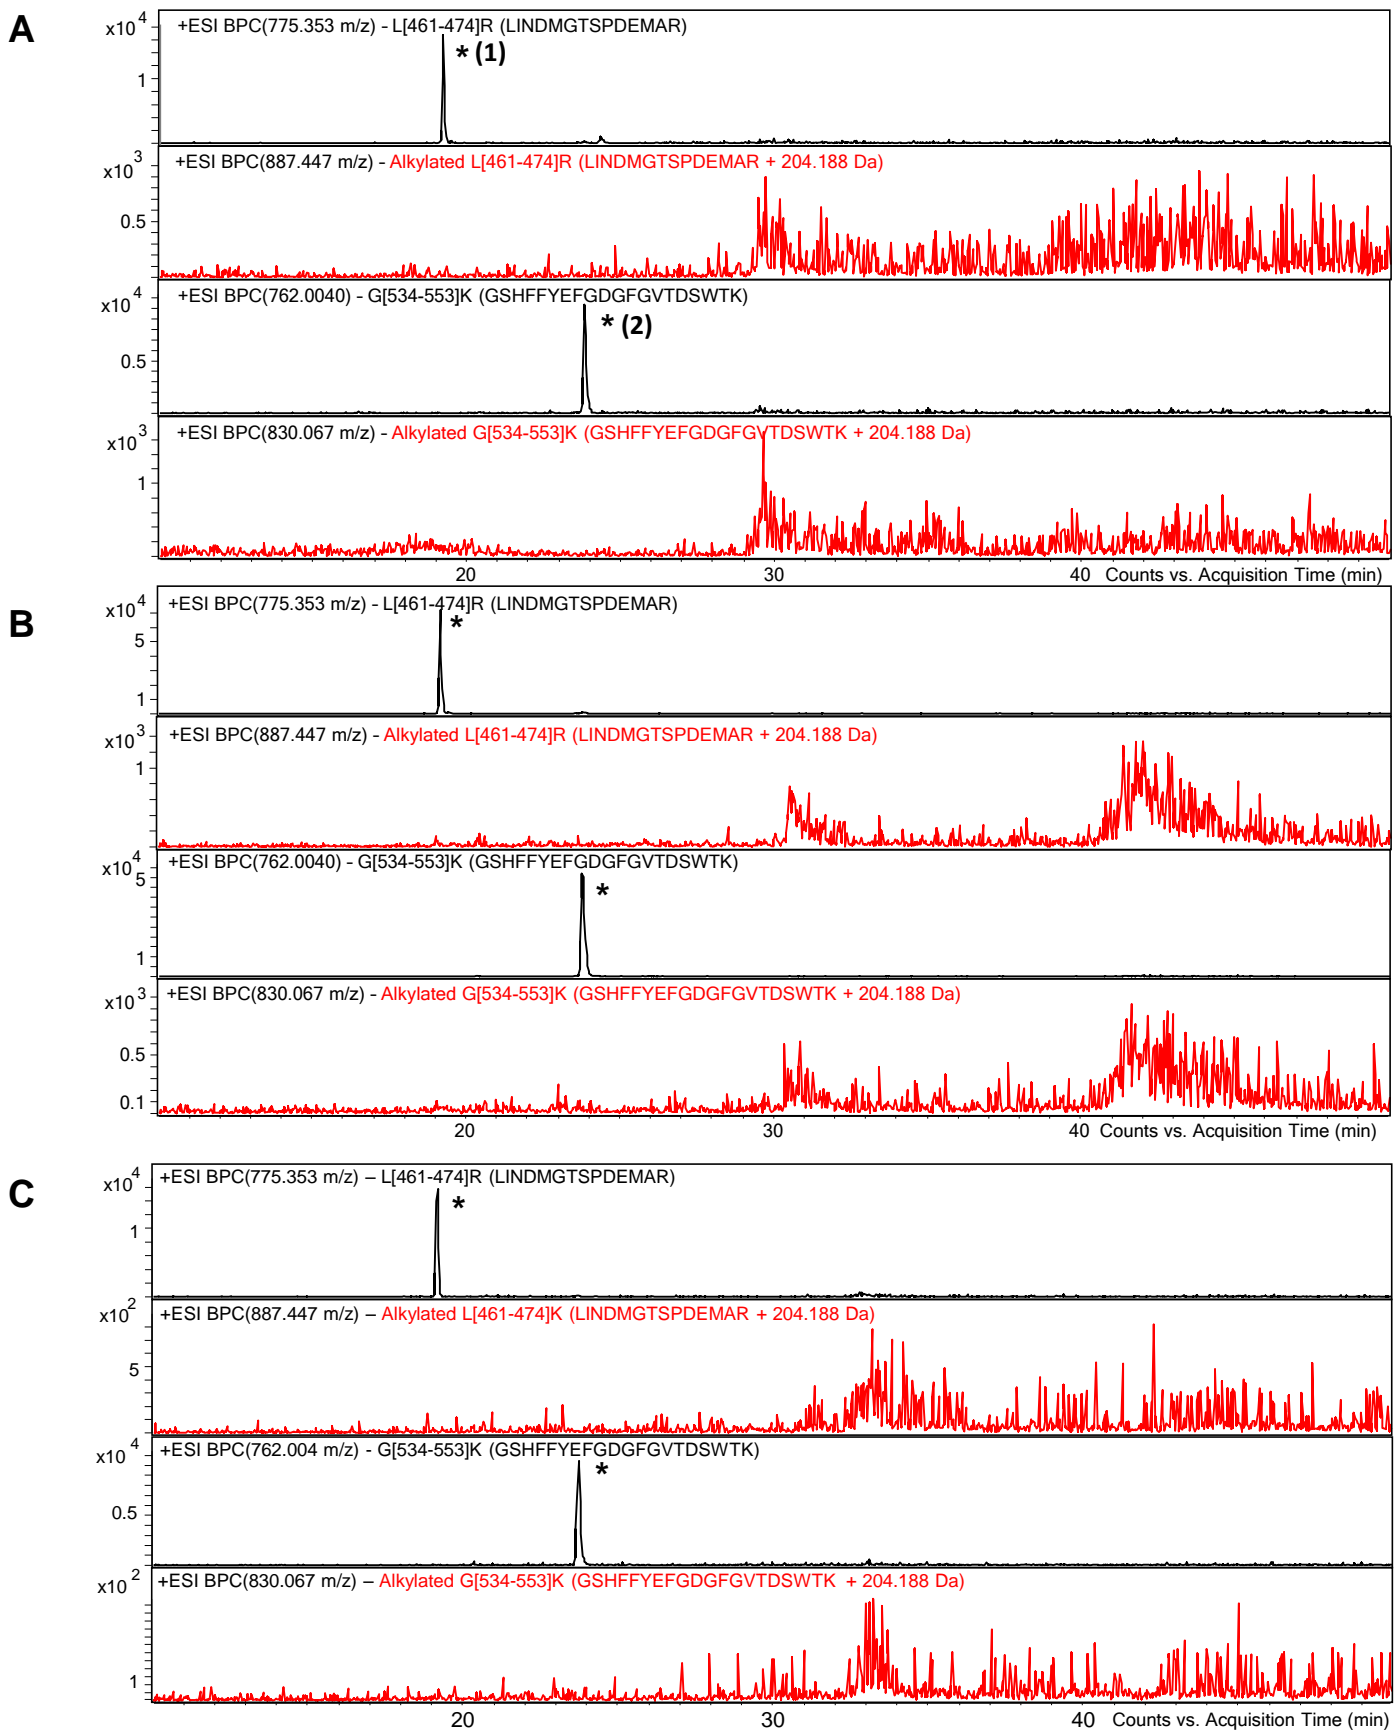

**Figure S14.** Alkylation analysis of multiproduct sesquiterpene synthases *Santalum spicatum* santalene synthase (SspiSSy), *Abies grandis*  $\gamma$ -humulene synthase ( $\gamma$ HS) and *Pogostemon cablin* patchoulol synthase (PAS). (A) LC-MS analysis of nonalkylated and alkylated L[461-474]R and G[534-553]K of wild-type SspiSSy after reaction with (*E,E*)-FPP. (B) LC-MS analysis of nonalkylated and alkylated L[461-474]R and G[534-553]K of wild-type SspiSSy after reaction with SPP. (C) LC-MS analysis of nonalkylated and alkylated L[461-474]R and G[534-553]K of SspiSSy W293E after reaction with (*E,E*)-PP. Single asterisks mark BPC peaks of nonalkylated peptides, double asterisks mark BPC peaks of alkylated peptides.

**D**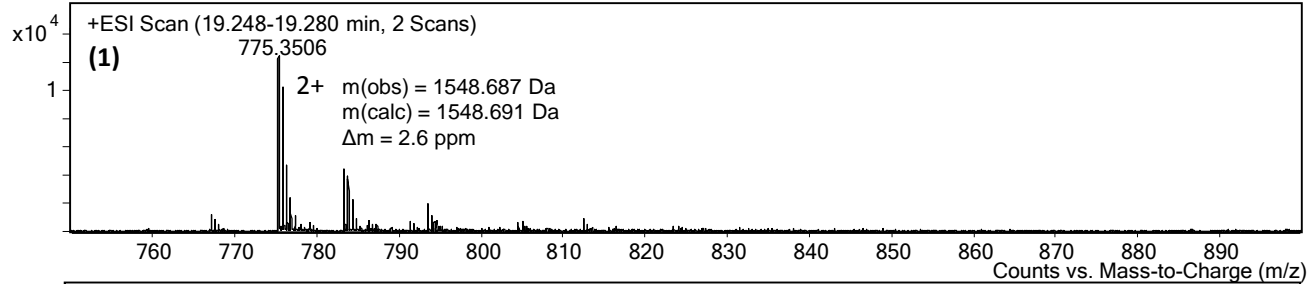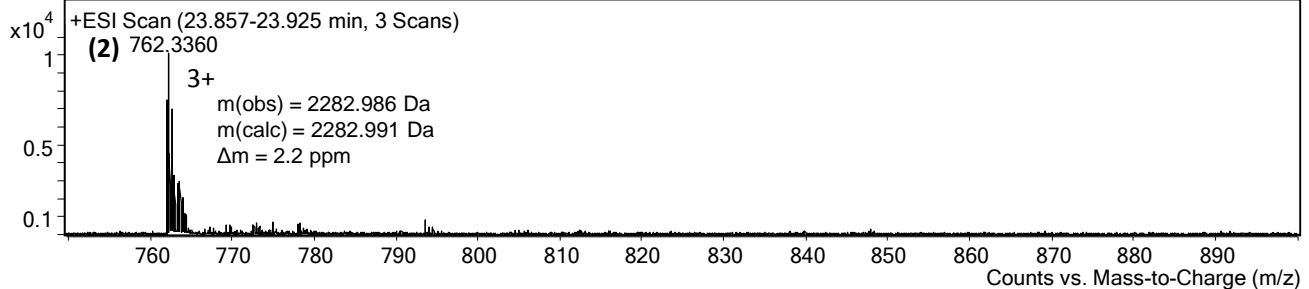**E**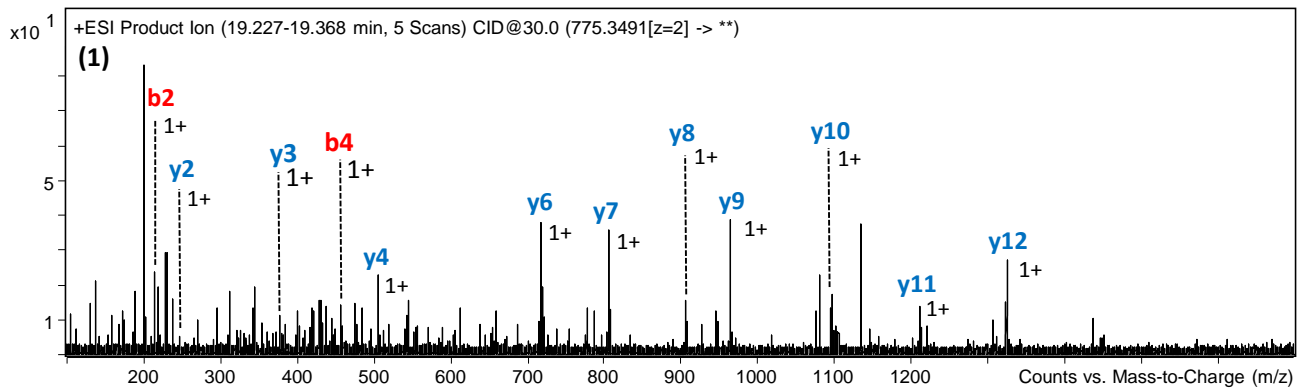

| Fragment | m(obs) [Da] | m(calc) [Da] | Δm [Da] | Δm [ppm] | Fragment | m(obs) [Da] | m(calc) [Da] | Δm [Da] | Δm [ppm] |
|----------|-------------|--------------|---------|----------|----------|-------------|--------------|---------|----------|
| y12      | 1323.520    | 1323.531     | 0.011   | 8.3      | y6       | 718.312     | 718.319      | 0.007   | 9.8      |
| y11      | 1209.473    | 1209.488     | 0.015   | 12.4     | y4       | 506.239     | 506.240      | 0.001   | 2.0      |
| y10      | 1094.453    | 1094.461     | 0.008   | 7.3      | y3       | 377.202     | 377.197      | -0.005  | 13.3     |
| y9       | 963.409     | 963.421      | 0.012   | 12.5     | y2       | 246.157     | 246.157      | 0.000   | 0.0      |
| y8       | 906.410     | 906.399      | -0.011  | 12.1     | b2       | 227.174     | 227.176      | 0.002   | 8.8      |
| y7       | 805.348     | 805.352      | 0.004   | 5.0      |          |             |              |         |          |

**Figure S14. Alkylation analysis of multiproduct sesquiterpene synthases *Santalum spicatum* santalene synthase (SspiSSy), *Abies grandis*  $\gamma$ -humulene synthase ( $\gamma$ HS) and *Pogostemon cablin* patchouliol synthase (PAS). (D) MS analysis of nonalkylated L[461-474]R (1) and G[534-553]K (2) of wild-type SspiSSy after reaction with (*E,E*)-FPP. (E) MS/MS analysis of nonalkylated L[461-474]R (1) of wild-type SspiSSy after reaction with (*E,E*)-FPP.**

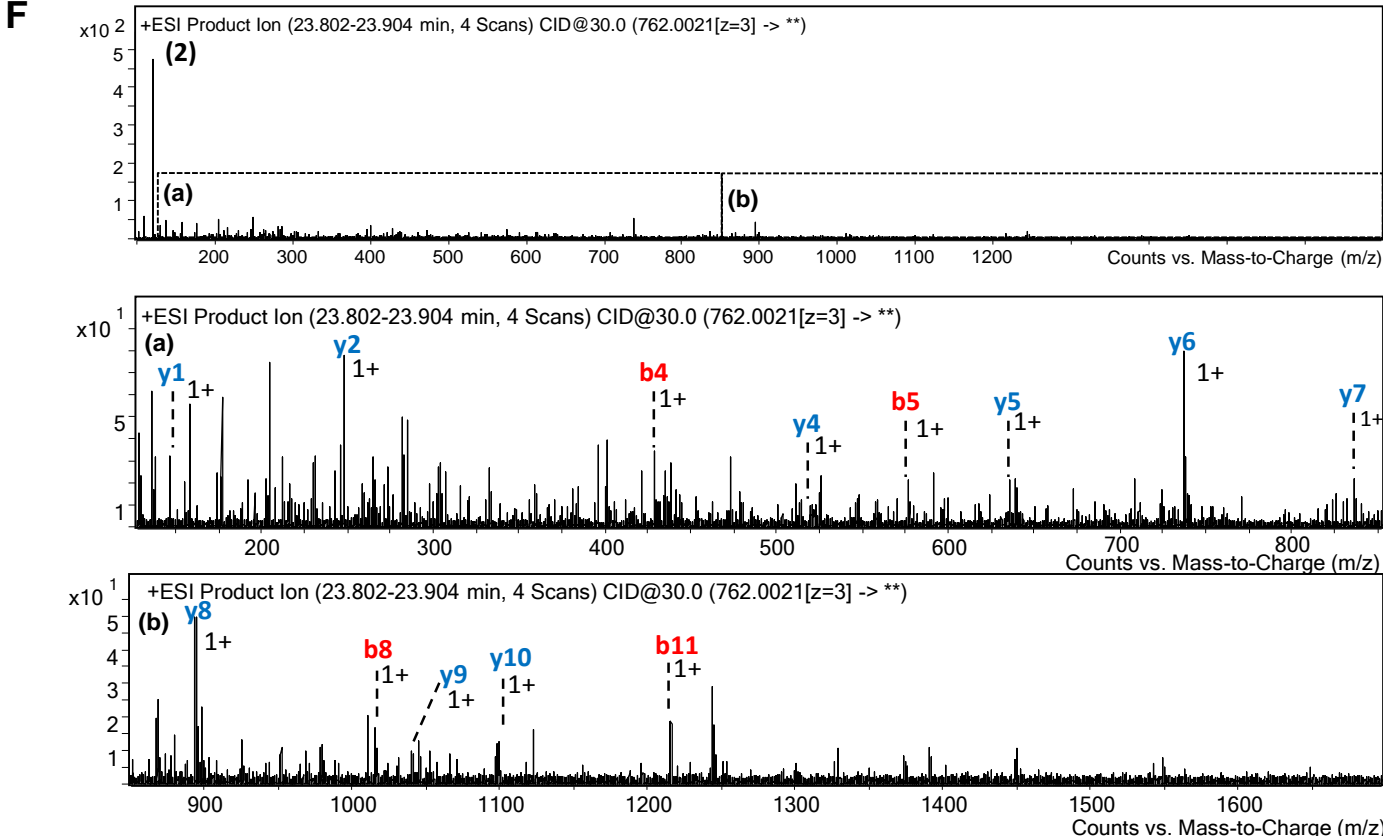

| Fragment | m(obs) [Da] | m(calc) [Da] | $\Delta$ m [Da] | $\Delta$ m [ppm] | Fragment | m(obs) [Da] | m(calc) [Da] | $\Delta$ m [Da] | $\Delta$ m [ppm] |
|----------|-------------|--------------|-----------------|------------------|----------|-------------|--------------|-----------------|------------------|
| b11      | 1244.501    | 1244.512     | 0.011           | 8.8              | y5       | 636.290     | 636.299      | 0.009           | 14.1             |
| y10      | 1097.543    | 1097.527     | -0.016          | 14.6             | b5       | 576.249     | 576.257      | 0.008           | 13.9             |
| y9       | 1040.515    | 1040.505     | -0.010          | 9.6              | y4       | 521.260     | 521.272      | 0.012           | 23               |
| b8       | 1015.418    | 1015.431     | 0.013           | 12.8             | b4       | 429.182     | 429.189      | 0.007           | 16.3             |
| y8       | 893.433     | 893.437      | 0.004           | 4.5              | y2       | 248.156     | 248.161      | 0.005           | 20.1             |
| y7       | 836.402     | 836.416      | 0.014           | 16.7             | y1       | 147.114     | 147.113      | -0.001          | 6.8              |
| y6       | 737.355     | 737.347      | -0.008          | 10.9             |          |             |              |                 |                  |

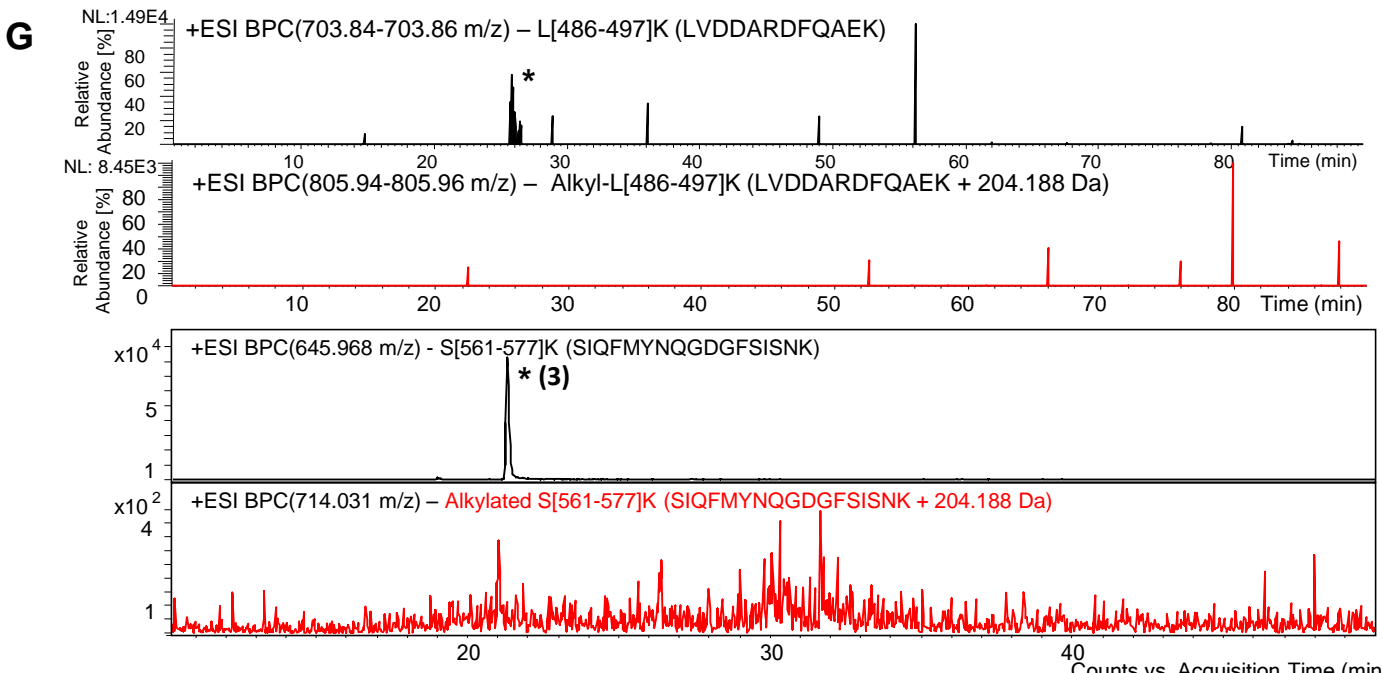

**Figure S14. Alkylation analysis of multiproduct sesquiterpene synthases *Santalum spicatum* santalene synthase (SspiSSy), *Abies grandis*  $\gamma$ -humulene synthase ( $\gamma$ HS) and *Pogostemon cablin* patchouli synthase (PAS). (F) MS/MS analysis of nonalkylated G[534-553]K (2) of wild-type SspiSSy after reaction with (*E,E*)-FPP. (G) LC-MS analysis of nonalkylated and alkylated L[486-497]K and S[561-577]K of wild-type  $\gamma$ HS after reaction with (*E,E*)-FPP. Single asterisks mark BPC peaks of non-alkylated peptides, double asterisks mark BPC peaks of alkylated peptides.**

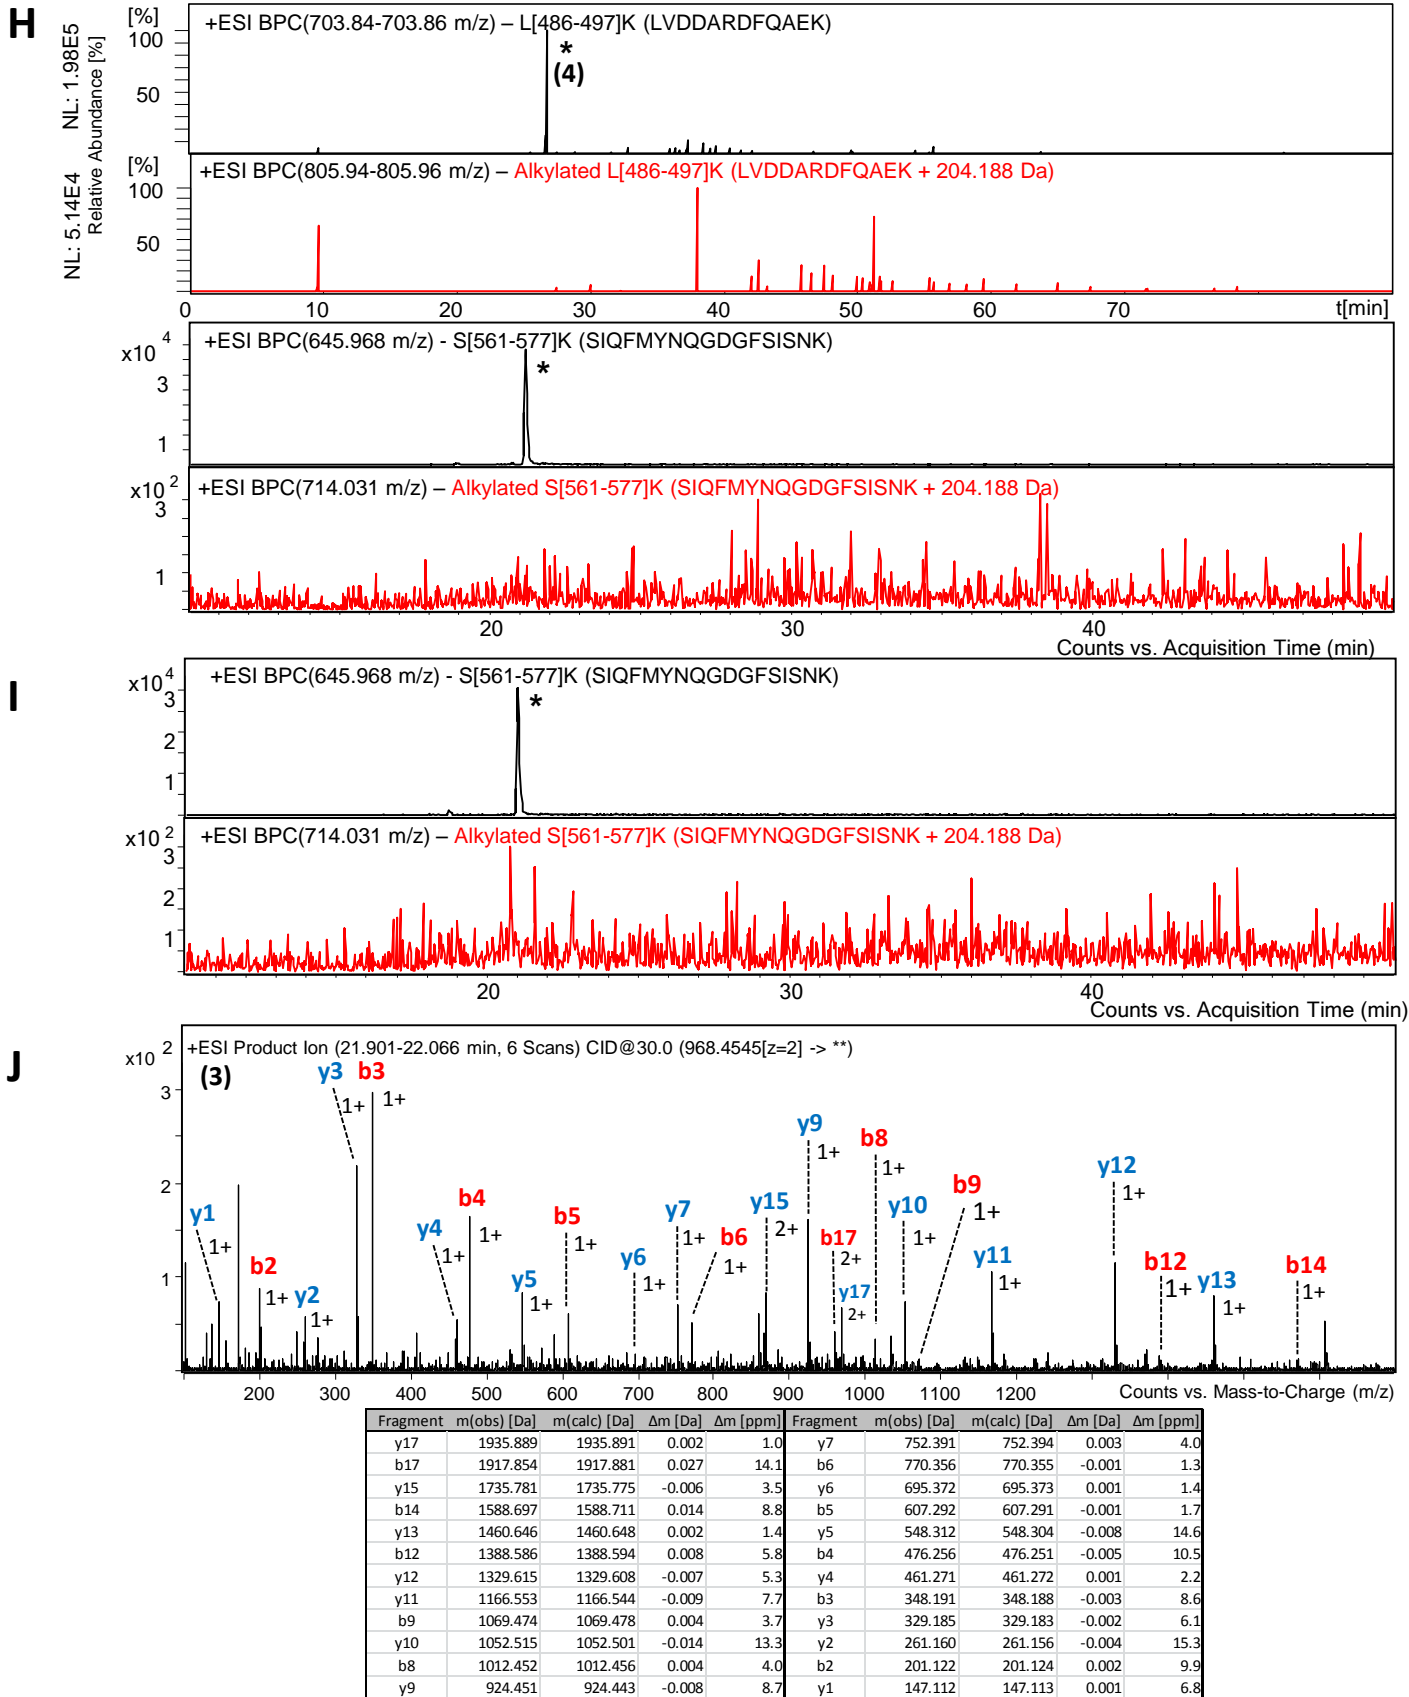

**Figure S14.** Alkylation analysis of multiproduct sesquiterpene synthases *Santalum spicatum* santalene synthase (SspiSSy), *Abies grandis*  $\gamma$ -humulene synthase ( $\gamma$ HS) and *Pogostemon cablin* patchouli synthase (PAS). (H) LC-MS analysis of nonalkylated and alkylated L[486-497]K and S[561-577]K of  $\gamma$ HS W315P after reaction with (E,E)-FPP. (I) LC-MS analysis of nonalkylated and alkylated S[561-577]K of wild-type  $\gamma$ HS after reaction with SPP. Single asterisks mark BPC peaks of nonalkylated peptides, double asterisks mark BPC peaks of alkylated peptides. (J) MS/MS analysis of nonalkylated S[561-577]K of wild-type  $\gamma$ HS after reaction with (E,E)-FPP.

K

FTMS + p NSI Full ms [197.0777-1500.0000]

#4534 RT: 26.82 AV: 1 NL: 1.92E5

(4)

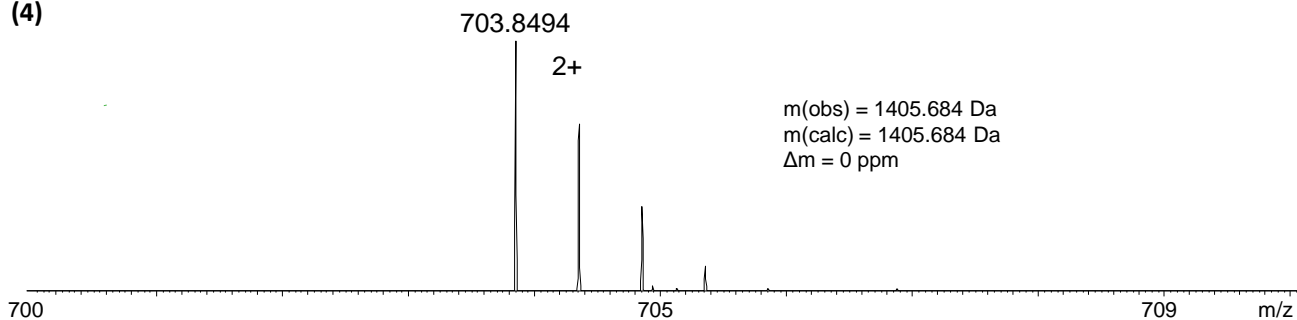

L

ITMS + c NSI r d Full ms2 703.8496@cid35.00 [188.0000-1417.9999]

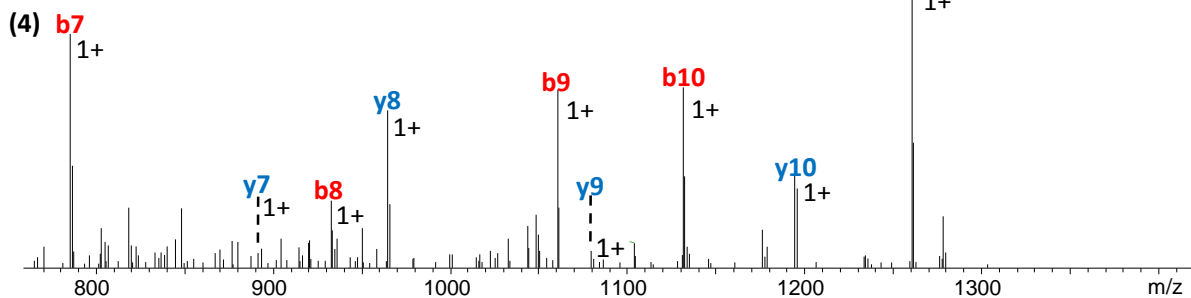

ITMS + c NSI r d Full ms2 703.8496@cid35.00 [188.0000-1417.9999]

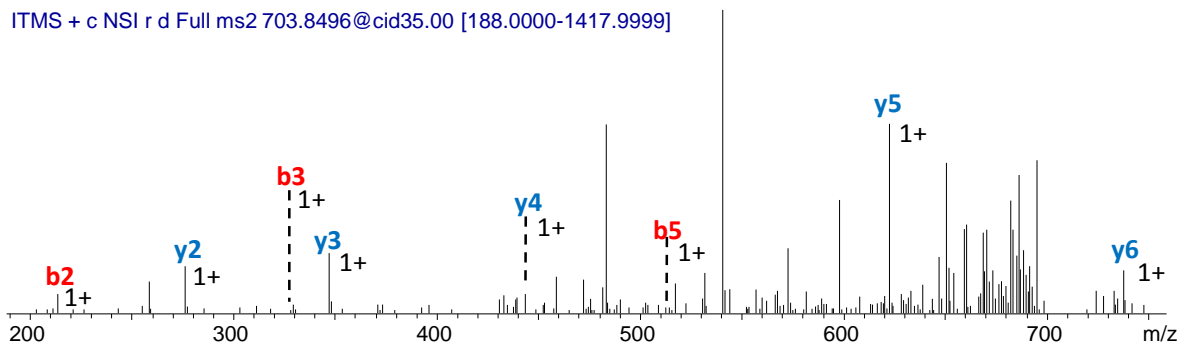

| Fragment | m(obs) [Da] | m(calc) [Da] | Δm [Da] | Fragment | m(obs) [Da] | m(calc) [Da] | Δm [Da] |
|----------|-------------|--------------|---------|----------|-------------|--------------|---------|
| b11      | 1260.621    | 1260.586     | 0.035   | b7       | 785.339     | 785.379      | -0.04   |
| y10      | 1194.615    | 1194.539     | 0.076   | y6       | 737.404     | 737.347      | 0.057   |
| b10      | 1131.544    | 1131.539     | 0.005   | y5       | 622.453     | 622.32       | 0.133   |
| y9       | 1079.607    | 1079.512     | 0.095   | b5       | 514.308     | 514.251      | 0.057   |
| b9       | 1060.583    | 1060.506     | 0.077   | y4       | 443.218     | 443.214      | 0.004   |
| y8       | 964.485     | 964.549      | -0.064  | y3       | 347.09      | 347.193      | -0.103  |
| b8       | 932.485     | 932.448      | 0.037   | b3       | 328.238     | 328.187      | 0.051   |
| y7       | 893.622     | 893.448      | 0.174   | y2       | 276.225     | 276.156      | 0.069   |
|          |             |              |         | b2       | 213.291     | 213.16       | 0.131   |

Figure S14. Alkylation analysis of multiproduct sesquiterpene synthases *Santalum spicatum* santalene synthase (SspiSSy), *Abies grandis*  $\gamma$ -humulene synthase ( $\gamma$ HS) and *Pogostemon cablin* patchoulol synthase (PAS). (K) MS analysis of nonalkylated L[486-497]K of  $\gamma$ HS W315P after reaction with (*E,E*)-FPP. (L) MS/MS analysis of nonalkylated L[486-497]K of  $\gamma$ HS W315P after reaction with (*E,E*)-FPP.

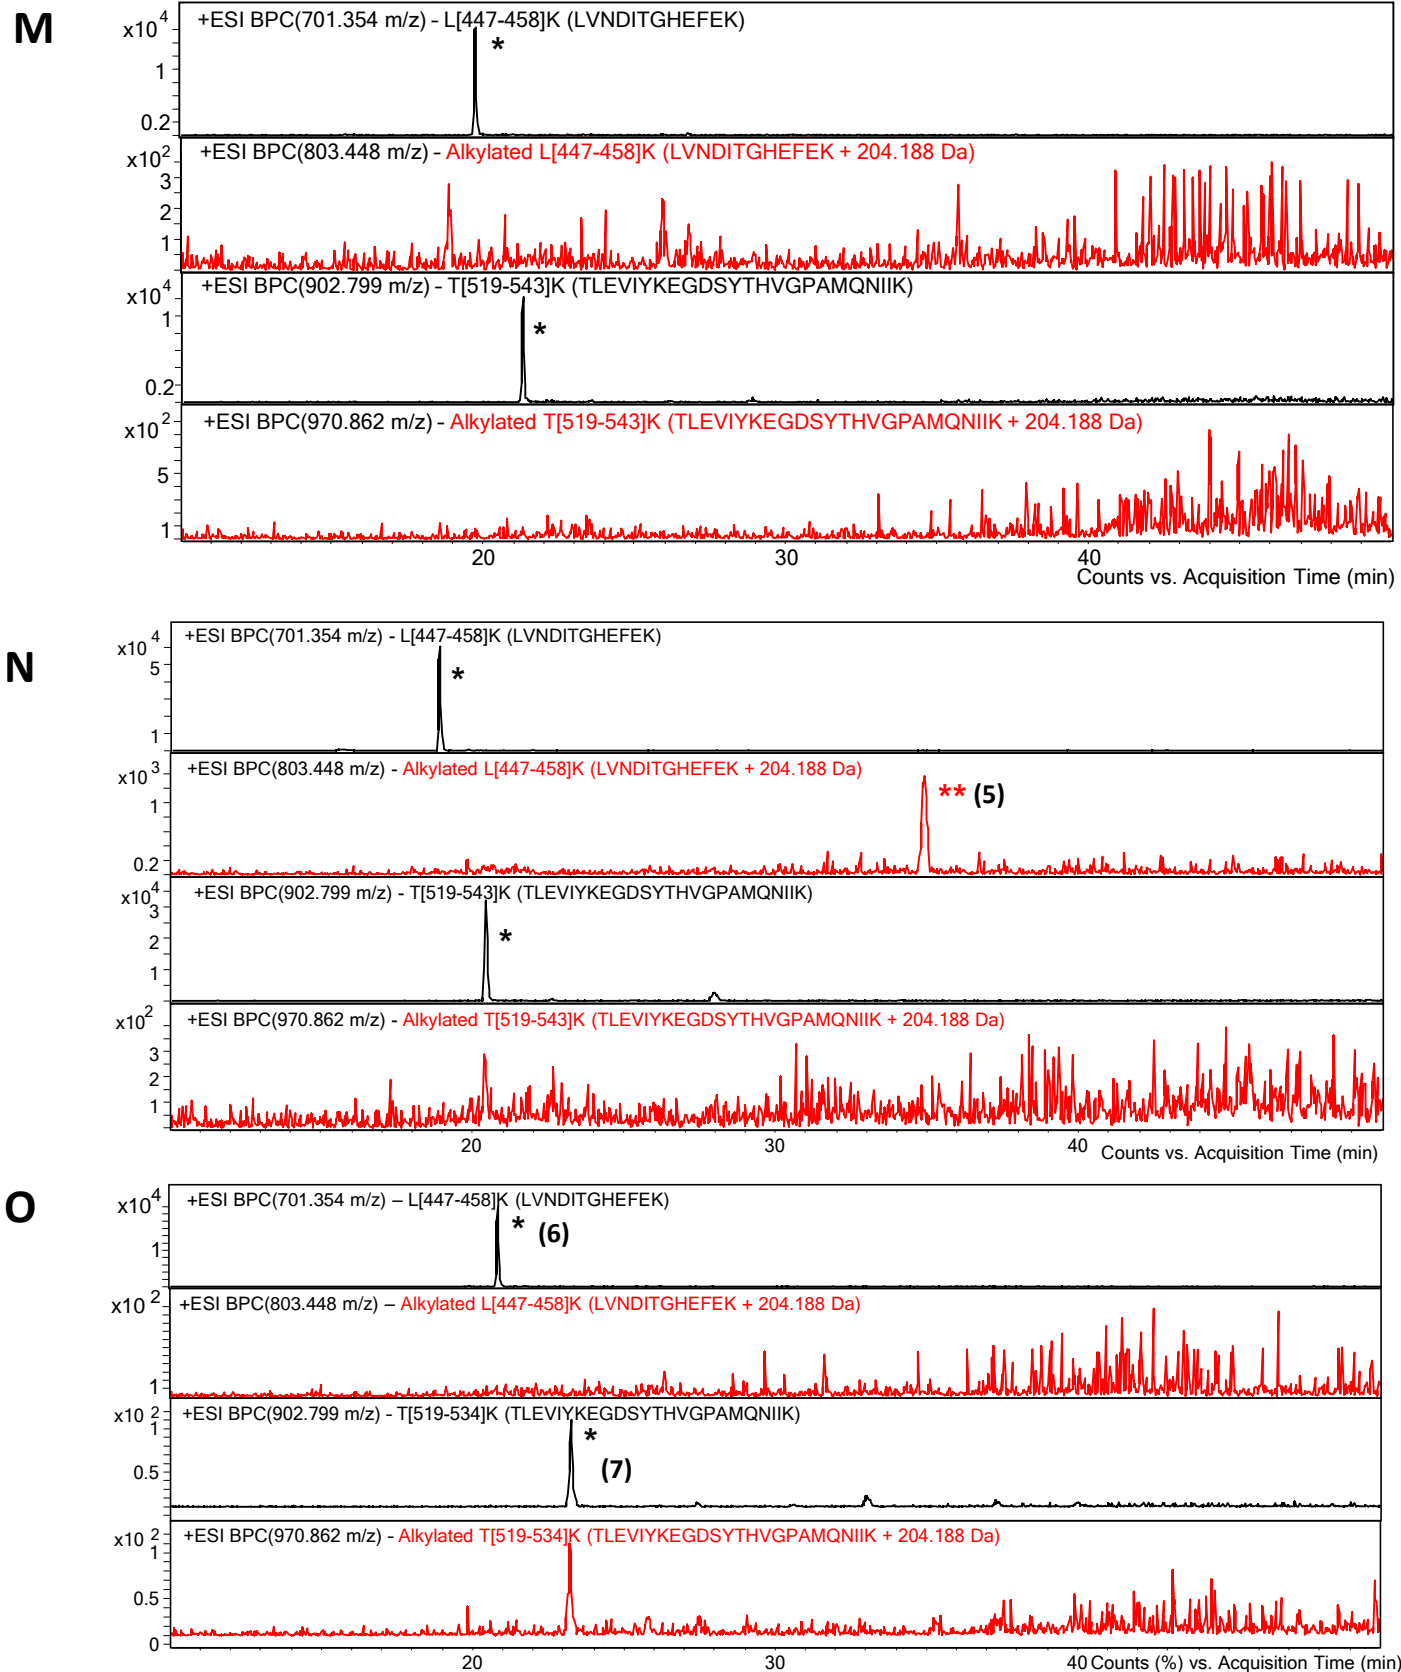

**Figure S14.** Alkylation analysis of multiproduct sesquiterpene synthases *Santalum spicatum* santalene synthase (SspISSy), *Abies grandis*  $\gamma$ -humulene synthase ( $\gamma$ HS) and *Pogostemon cablin* patchouli synthase (PAS). **(M)** LC-MS analysis of nonalkylated and alkylated L[447-458]K and T[519-543]K of wild-type PAS after reaction with (*E,E*)-FPP. Single asterisks mark BPC peaks of nonalkylated peptides, double asterisks mark BPC peaks of alkylated peptides. **(N)** LC-MS analysis of nonalkylated and alkylated L[447-458]K and T[519-543]K of wild-type PAS after reaction with SPP. **(O)** LC-MS analysis of nonalkylated and alkylated L[447-458]K and T[519-543]K of PAS W276E after reaction with (*E,E*)-FPP. Single asterisks mark BPC peaks of nonalkylated peptides, double asterisks mark BPC peaks of alkylated peptides.

**N**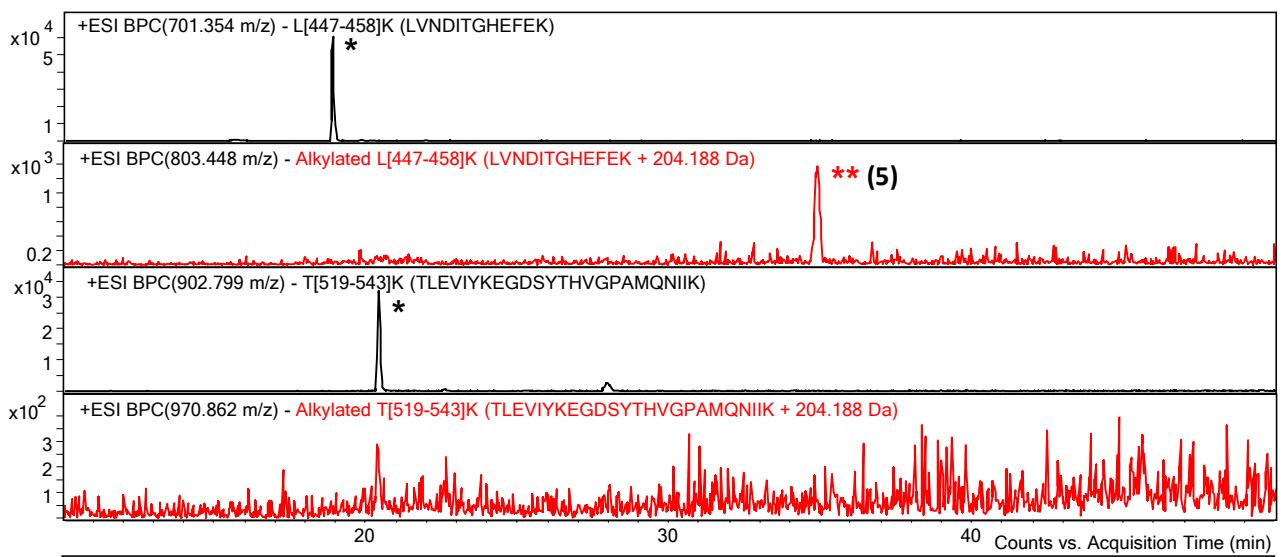**O**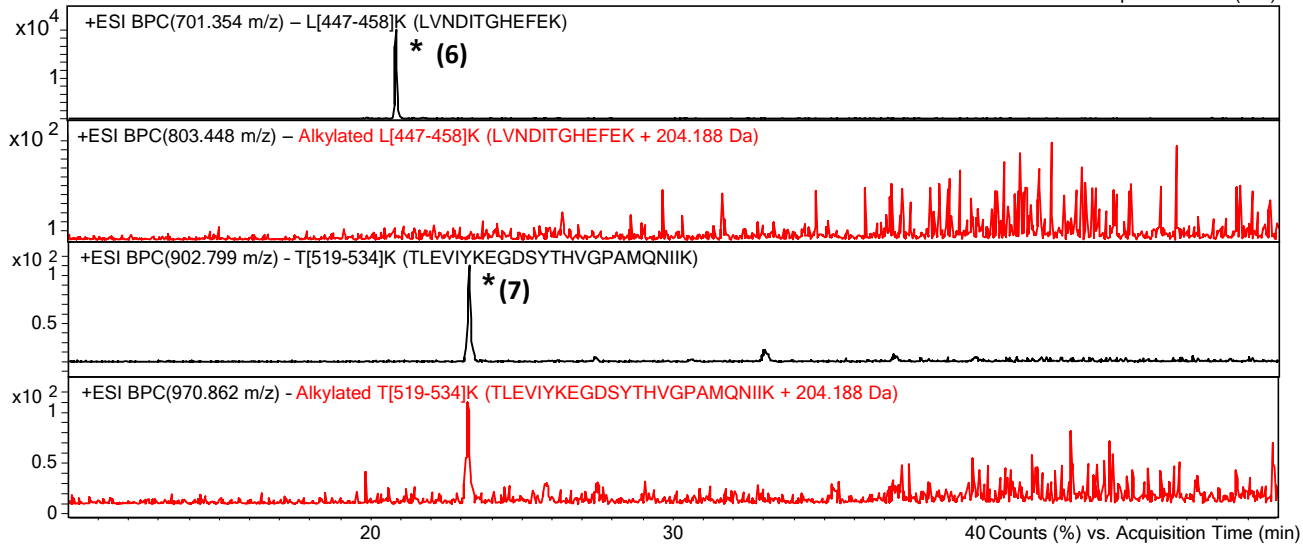**P**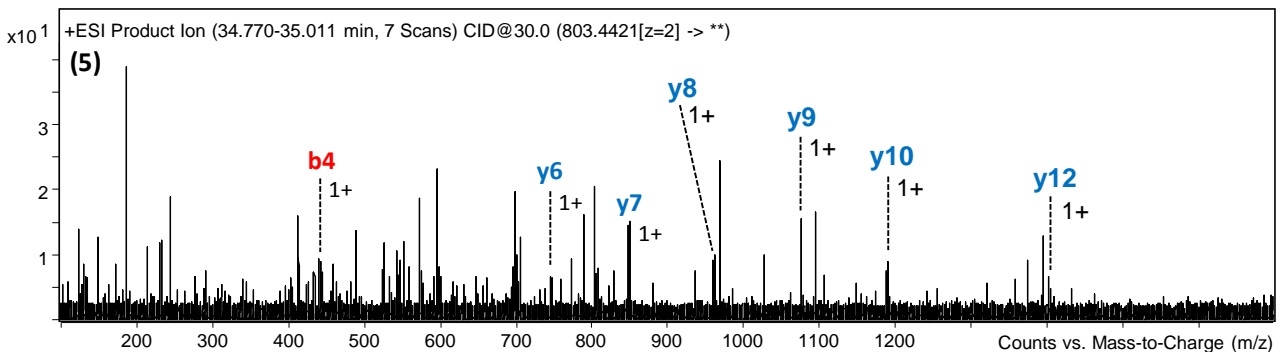

| Fragment | m(obs) [Da] | m(calc) [Da] | $\Delta$ m [Da] | $\Delta$ m [ppm] |
|----------|-------------|--------------|-----------------|------------------|
| y12      | 1401.685    | 1401.702     | 0.017           | 12.1             |
| y10      | 1189.535    | 1189.549     | 0.014           | 11.8             |
| y9       | 1075.514    | 1075.506     | -0.008          | 7.4              |
| y8       | 960.471     | 960.479      | 0.008           | 8.3              |
| y7       | 847.402     | 847.392      | -0.010          | 11.8             |
| y6       | 746.336     | 746.347      | 0.011           | 14.7             |
| b4       | 442.225     | 442.230      | 0.005           | 11.3             |

**Figure S14. Alkylation analysis of multiproduct sesquiterpene synthases *Santalum spicatum* santalene synthase (SspiSSy), *Abies grandis*  $\gamma$ -humulene synthase ( $\gamma$ HS) and *Pogostemon cablin* patchoulol synthase (PAS).**

**(N)** LC-MS analysis of nonalkylated and alkylated L[447-458]K and T[519-543]K of wild-type PAS after reaction with SPP. **(O)** LC-MS analysis of nonalkylated and alkylated L[447-458]K and T[519-543]K of PAS W276E after reaction with (*E,E*)-FPP. Single asterisks mark BPC peaks of nonalkylated peptides, double asterisks mark BPC peaks of alkylated peptides. **(P)** MS/MS analysis of alkylated L[447-458]K (5) of wild-type PAS after reaction with SPP.

Q

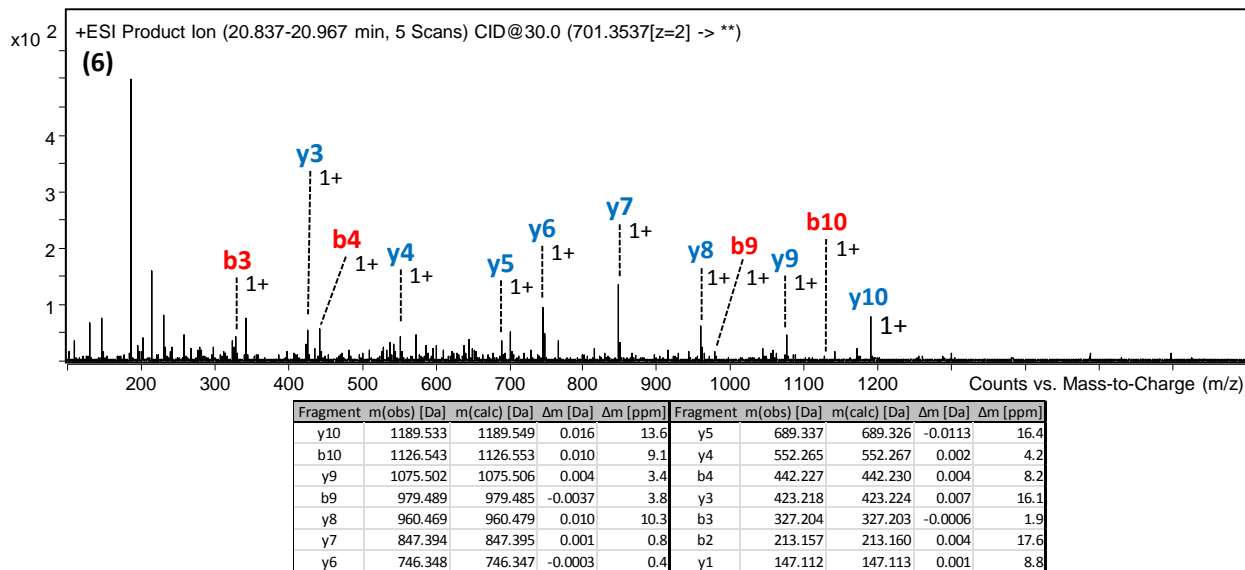

R

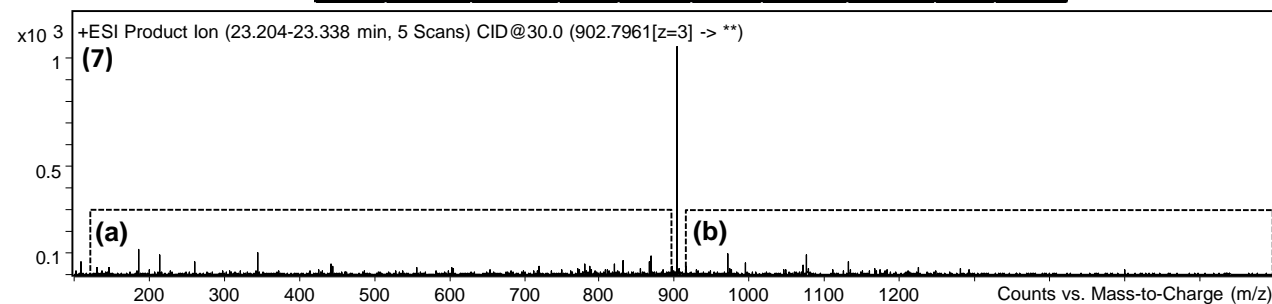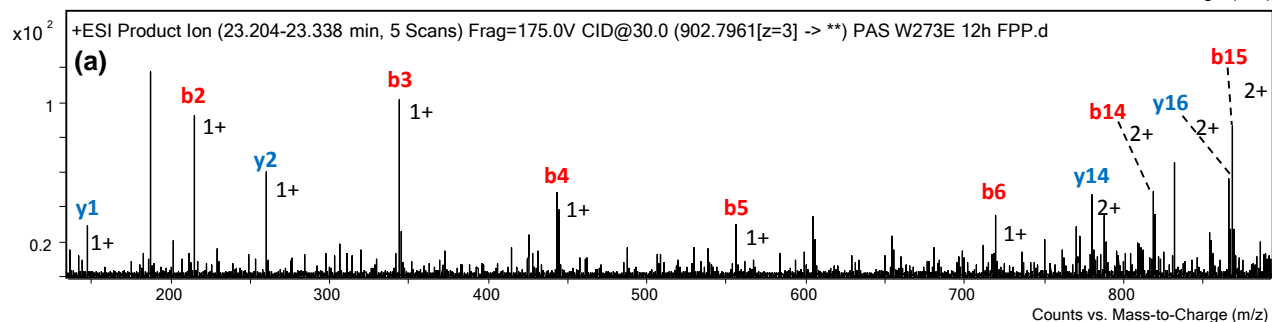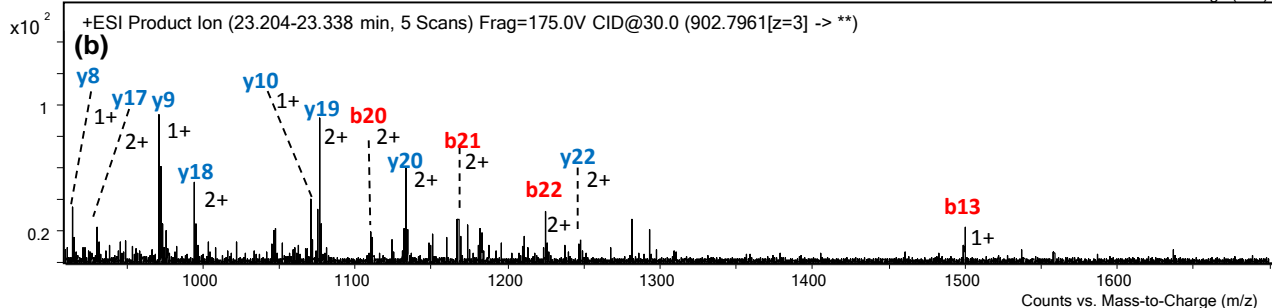

| Fragment | m(obs) [Da] | m(calc) [Da] | $\Delta$ m [Da] | $\Delta$ m [ppm] | Fragment | m(obs) [Da] | m(calc) [Da] | $\Delta$ m [Da] | $\Delta$ m [ppm] |
|----------|-------------|--------------|-----------------|------------------|----------|-------------|--------------|-----------------|------------------|
| y22      | 2492.282    | 2492.250     | -0.0324         | 13               | y14      | 1558.795    | 1558.805     | 0.011           | 6.9              |
| b22      | 2447.190    | 2447.192     | 0.002           | 0.9              | b13      | 1499.735    | 1499.727     | -0.008          | 5.5              |
| b21      | 2334.129    | 2334.108     | -0.021          | 9                | y8       | 914.502     | 914.513      | 0.011           | 12.3             |
| y20      | 2264.166    | 2264.139     | -0.0273         | 12.1             | b6       | 719.390     | 719.398      | 0.008           | 11.7             |
| b20      | 2220.040    | 2220.065     | 0.024           | 11               | b5       | 556.335     | 556.330      | -0.005          | 8.4              |
| y19      | 2151.028    | 2151.055     | 0.027           | 12.3             | b4       | 443.251     | 443.250      | -0.001          | 1.4              |
| y18      | 1987.978    | 1987.991     | 0.013           | 6.5              | b3       | 344.184     | 344.182      | -0.002          | 4.7              |
| b15      | 1735.848    | 1735.854     | 0.006           | 3.7              | y2       | 260.199     | 260.197      | -0.002          | 7.1              |
| y16      | 1730.862    | 1730.854     | -0.0084         | 4.8              | b2       | 215.139     | 215.140      | 0.001           | 1                |
| b14      | 1636.783    | 1636.786     | 0.003           | 2.1              | y1       | 147.114     | 147.113      | 0.001           | 2                |

Figure S14 | Alkylation analysis of multiproduct sesquiterpene synthases *Santalum spicatum* santalene synthase (SspISSy), *Abies grandis*  $\gamma$ -humulene synthase ( $\gamma$ HS) and *Pogostemon cablin* patchouli synthase (PAS). (P) MS/MS analysis of alkylated L[447-458]K (5) of wild-type PAS after reaction with SPP. (Q) MS/MS analysis of nonalkylated L[447-458]K (6) of PAS W276E after reaction with (*E,E*)-FPP. (R) MS/MS analysis of nonalkylated T[519-543]K (7) of PAS W276E after reaction with (*E,E*)-FPP.
